# Supplementary material for: Exploring the Ferroptosis Mechanism of Zhilong Huoxue Tongyu Capsule for the Treatment of Intracerebral Hemorrhage Based on Network Pharmacology and In Vivo Validation
Source: Evid Based Complement Alternat Med. 2022 Sep 25;2022:5033135. doi: 10.1155/2022/5033135 (PMC9527400; doi:10.1155/2022/5033135)
Supplement: Supplementary Materials — The supplemental file of network pharmacology-related data in the article. [file 5033135.f1.xlsx]

## Sheet: Targets
Ferroptosis related target	ICH related target	ZL related targets
AIFM2	ENG	PPARG
GPX4	ACVRL1	LTA4H
NFE2L2	APP	MAOB
SLC7A11	COL4A1	PRSS1
TP53	KRIT1	ESR1
ACSL4	NOTCH3	ADRB2
BECN1	CCM2	CCNA2
TFRC	CST3	PGR
NCOA4	SMAD4	NCOA2
PRKAA1	PDCD10	NR3C2
YAP1	LOC102723566	PTGS1
PARK7	F2	PTGS2
ATF4	COL4A2	PIK3CG
MIR214	APOE	KCNH2
ELAVL1	F5	CHRM3
HMOX1	GDF2	CHRM1
SLC40A1	IL6	SCN5A
KRAS	ACE	Gabra2
LINC00336	TREX1	CHRM4
SLC3A2	QARS1	PDE3A
LAMP2	HTRA1	HTR2A
GOT1	GAMT	Gabra5
ECH1	VWF	ADRA1A
DECR1	ITM2B	Gabra3
PLA2G6	ATRIP	CHRM2
MDM2	ATRIP-TREX1	ADRA1B
LCN2	F7	CHRNA2
RELA	TNF	SLC6A4
NF2	NOS3	OPRM1
IREB2	F8	GABRA1
ATM	TP53	CHRNA7
TNF	SERPINE1	BCL2
FBXW7	KRAS	BAX
ATG16L1	PMM2	CASP9
SLC39A7	MTHFR	JUN
ZFP36	PTEN	CASP3
H2AC1	FH	CASP8
SIRT3	PSEN1	PRKCA
BAP1	SAMHD1	TGFB1
ADCY10	COL3A1	PON1
CTSB	THSD1	MAP2
CBS	FGA	CALM1
YWHAE	PIK3CA	FASN
PRDX6	FOLR1	KLF7
RPL7	RNASEH2B	RXRA
RPS3A	PRNP	CAT
RACK1	SERPINF2	HAS2
HELLS	BRAF	RELA
IDH1	JAK2	ICAM1
PTEN	F11	DGAT2L6
GSK3B	F9	MTTP MTP
PRDX1	GAD1	APOB
TNFAIP3	SERPINC1	NR3C2
SREBF1	JAM3	HTR2A
HMGB1	SMARCA4	SLC6A4
MAP1LC3B	F10	CHRNA7
WWTR1	ADD3	KDR
NEAT1	PKD1	MET
AHCY	F3	KCNMA1
MYCN	ITGB3	TOP2
XRCC6	ACTA2	GRIA2
FOXC1	NOS2	GABRA6
STYK1	SERPINA3	LYZD1
OTUB1	NF1	SLC6A2
PIR	F13A1	NOS2
SESN2	TSC2	AR
PVT1	ITGA2B	DPP4
VDAC1	PLAT	NOS3
IDH2	RNF213	ACHE
DLD	TGFB2	F7
CP	IL10	IKBKB
JUN	GFAP	AKT1
HNRNPA1	FGB	TNF
STUB1	ICAM1	AHSA1
MDM4	GP1BA	MAPK8
GPX3	FGG	XDH
ARNTL	NDE1	MMP1
GSTZ1	MAPT	STAT1
CISD1	GBA	HMOX1
PROM2	IL1B	CYP3A4
YTHDC2	HHT4	CYP1A2
MIR424	CTNNB1	CYP1A1
DDR2	FBN1	SELE
LONP1	MPL	VCAM1
CD82	TSC1	NR1I2
ASAH2	PALS1	CYP1B1
HDDC3	CRP	ALOX5AP
EP300	TLR4	GSTP1
CREB1	VEGFA	AHR
POR	ERCC6	PSMD3
TFAP2A	PAFAH1B1	SLC2A4
AKR1C2	MPO	NR1I3
AKR1C3	PROS1	INSR
PEBP1	MT-TL1	DIO1
CCL5	MMP9	PPP3CA
AKR1C1	P2RY12	GSTM1
KDM3B	S100B	GSTM2
CYB5R1	ELN	AKR1C3
ABCB10	IFNG	SLPI
CYGB	PDGFRB	PPARG
PAQR3	SARS1	F10
MIR326	AP4E1	MMP3
MIR324	PDGFB	EGFR
ALOX15	DCX	VEGFA
PTGS2	PSEN2	CCND1
ABCB6	TGFBR3	BCL2L1
ACADSB	THPO	FOS
FXN	TERT	CDK1
NEDD4	SNAP29	EIF6
NEDD4L	TGFBR2	PLAU
LTF	ANGPTL6	MMP2
ETV4	TGFB1	MMP9
PANX1	HHT3	MAPK1
VDAC3	CXCL8	IL10
YME1L1	PRKCH	EGF
VDAC2	POLG	RB1
NOX4	CFI	IL6
PLIN2	GSN	TP53
RHOT1	IDH1	ELK1
KDM4A	SERPINI1	NFKBIA
CSRP2	ALB	POR
GABPB1	RASA1	ODC1
STOML2	LEMD3	TOP1
DAZAP1	GNAQ	RAF1
H2AX	LRP1	SOD1
SLIRP	TIMP3	HIF1AN
SCGB1D2	SST	RUNX1T1
TMED8	BDNF	HSPA5
MIR375	ENO2	ERBB2
MIR106A	TET2	ACACA
GABPB1-AS1	CACNA1D	CAV1 CAV
NOTCH2	ADAMTS13	MYC
TYRO3	CDKL5	F3
CA9	EDN1	GJA1
BSG	CFH	IL1B
FZD7	ANIB1	CCL2
TTBK2	SOD1	PTGER3
ITGB8	TGFBR1	CXCL8
MEG8	SMARCB1	PRKCB
MIR497	CALR	BIRC5
MIR761	IGF1	DUOX2
MIR4443	TGFB3	HSPB1
EGFR	PITPNM3	MGAM
FTH1	F13B	IL2
SCD	GP1BB	NR1I2
FABP4	SNCA	CCNB1 CCNB
DPEP1	ARSA	PLAT
DNAJB6	VKORC1	SERPINE1
CHMP1A	SH2B3	COL1A1
COPZ1	SLC1A2	IFNG
QSOX1	EGF	PTEN
MIR1231	GRIK2	IL1A
ITGA6	PTGS2	MPO
PRKAA2	CP	TOP2A
FANCD2	IFIH1	NCF1
ALOX12	CASP3	ABCA2
CD44	TTR	NFE2L2
ATG5	STAT2	NQO1
ATG7	USP18	PARP1
MAPK1	CD209	COL3A1
LDHA	AKT1	CXCL11
PCNA	MMP2	CXCL2
MYC	CCM2L	DCAF5
ALB	DNM2	CHEK2
ACTB	AP4M1	CLDN4
EGLN1	LOC106627981	PPARA
TPM1	CBS	PPARD
ANXA2	CD36	HSF1
KRT18	SHH	CRP
MDH2	SDHB	CXCL10
NQO1	IDH2	CHUK
KRT14	ITGA2	SPP1
ENO1	FLI1	RUNX2
HSPA8	GUCY1A1	RASSF1 RDA32
MAP3K5	ATRX	E2F1
ANXA5	SEPSECS	E2F2
FH	ALG14	ACP3
TPM3	AQP4	CTSD
GNB1	TUBA1A	IGFBP3
KRT19	STXBP1	IGF2
ANXA4	ADA2	D40LG
ATP6V1E1	NF2	IRF1
CTSZ	EMX2	ERBB3
KRT16	LDLR	PCOLCE
LGALS3	RNF213-AS1	NPEPPS
PRKCSH	VLDLR	HK2
RPS3	RANBP2	NKX3-1
RPS6	HLA-B	RASA1
SOCS1	APOH	NOS2
PSMA1	BAP1	ESR2
ANP32A	GRIN1	MAPK14
EEF1A1	PROC	GSK3B
EIF4H	IDE	CHEK1
PSME1	HMOX1	PYGM
RPS2	ANIB2	NCOA1
RPL7A	COLGALT1	OLR1
SNAP29	PLG	DPP4
KRT6B	ALOX5AP	ADRB1
CLTB	PLAU	HTR3A
FKBP3	IL4	ADRA2C
TXNL1	PLOD1	ADRA1D
PSMD8	MYH11	SLC6A3
TPM4	THBD	PKIA
MYL12A	GDNF	IL4
STOM	TEK	SIRT1
ANP32B	MED12L	ATP5F1B
DECR2	SMAD3	MT-ND6
TPD52L2	CALCA	HSD3B2
DNAJC9	TARDBP	HSD3B1
PHB1	DOCK8	CHRM5
TRIM26	PECAM1	OPRD1
CARS1	CACNA1A	RXRB
CCDC124	SERPINA1	NR0B1
PYM1	ANIB3	CKM
MIR9-1	RELN	CKB
MIR137	PRTN3	APOA2
STK11	GCDH	IL13
CHAC1	BMPR2	COL27A1
UBE2D3	NOTCH1	RGCC
ERCC6	APOB	ESRRG
CUL4B	MYH9	IGF1
DDB1	CD46	FASLG
CUL4A	PLA2G6	ELOVL1
RBX1	KDR	NUFIP2
DCAF8	EGFR	OXER1
H1-4	SCN1A	CYP4F2
H1-5	STAT3	ALDH8A1
WDR76	RUNX1	SERPINH1
H1-2	TGIF1	ITGAV
H1-1	AGT	PTPN2
H1-3	ARX	PAX2
H1-10	FCGR2A	NR1H2
EPAS1	SELE	AGTR2
NFS1	FGFR1	ANAPC2
RB1	COL1A2	CDC20
G3BP1	GFI1B	NR1D1
LINC00472	FLT1	ELOVL7
HIF1A	FLNA	WDR77
G0S2	FARSB	GJD4
HILPDA	MTOR	CPLX2
HSPB1	SLC20A2	SLC35G1
HSPA5	SDHD	DHRS9
ACSL1	VHL	FGF2
PCBP1	WAS	TRPA1
TIGAR	MMP3	SLC8A1
PRC1	ANIB4	TRPV1
MT1G	GNB1	RARB
TGFBR1	L1CAM	SLC6A8
GSTP1	FN1	CKMT1A
UCHL1	PROCR	GPRC5A
ANXA1	GGCX	ALDH3A1
FASN	SELP	GATM
MYH9	ADD1	SERPINB7
YWHAG	ABCC6	IHH
SNCA	COL4A2-AS1	FNDC5
VIM	DLL4	AVPR1A
ALDOA	SYNGAP1	CACNA1A
YWHAB	GRIN2B	MAPK9
TUBA1A	HLA-DRB1	ADRA2A
TF	CSF3	RPL7A
PGK1	FGF2	PTGIS
GNB3	IL1RN	SHBG
ENO2	ERCC8	NPPC
HSPA9	CR1	GNAT2
YWHAZ	CTLA4	S100A8
DLST	EPHB4	SP1
ACVR1B	SLC2A1	NEUROD2
HADHA	ADAR	JAK3
LDHB	NPC1	WNT11
GPI	SMO	DNAJA3
MYH10	KIT	SLC3A2
PRDX2	IFNA1	PAX7
UBA1	MAPK1	MECOM
RPL5	LRP5	SNCA
CFL1	DLL1	NOS1
CKB	ATP6V1A	S100A9
EIF4A1	FURIN	ABCG1
DPYSL2	EPO	GAMT
HSP90B1	AGTR1	RARG
TUBB4A	KNG1	RXRG
VAPB	CREB1	ELOVL4
RPL10	NDP	SC5D
PDIA3	CCL2	ABCC2
SMC3	CSTB	OPN3
CCT5	BRCA2	SLC8B1
HP	MIR34A	MED1
EWSR1	ACTA2-AS1	PLA2R1
PROK2	CYP2C9	MAP4K4
VAPA	SPTAN1	OPN4
RPA2	ATP2A2	PNPLA2
RPL15	ANGPT2	CNST
RPSA	MEN1	SLC8A3
XRCC5	SETD2	MATN1
HNRNPD	IL1A	FGF4
LRPPRC	COMT	GNB2L1
PTBP1	XPR1	TBC1D32
TRIM28	GLI2	RET
RUVBL1	RNASEH2C	PAXBP1
RPL13A	CUX2	SCD
CNBP	MUC1	PLCB1
CBX3	ANIB5	ADIPOQ
ACTC1	ANIB6	MYL2
BANF1	ANIB7	TRPM8
FSCN1	ANIB8	VDR
KHDRBS1	ANIB10	PRDM16
DUT	ANIB11	CKMT1B
MAP4	ANIB9	FADS2
RPL26	NOS1	ACSL4
RPS13	GP6	ALDH1A1
CCT3	CPT2	ALDH1A2
ITIH3	BMPR1A	SLC16A12
DHX9	SYP	NDRG2
HMGN1	PTCH1	HOPX
RPLP0	IL18	NR1H3
RPLP2	DNMT3A	FMR1
RPS7	TNFRSF1A	ITGB3
PDIA4	DTNBP1	ANXA13
PFN2	ADGRG1	STX3
SNRPA	HPS6	CAPN3
CCT6A	CDH2	GDF5
CCT8	PRKG1	FGF10
CCT4	ADORA2A	HEG1
HNRNPL	XYLT2	MYOD1
HNRNPM	HBB	TCF3
NOLC1	G6PD	SP3
RPL30	GSR	SCD5
PDIA6	CLU	GATA3
SNRPD2	PKD2	JUNB
WTAP	HIF1A	KCNA5
KSR2	PROZ	MEX3C
NAP1L1	JAM2	ABCA1
MYL6B	EIF2AK4	ABHD5
PLXNA4	CTSD	RYR2
SSBP1	SLC6A3	ALOX15
RPL34	BACE1	PAWR
RPS4X	SUFU	FABP3
SLC25A31	HP	CYR61
YBX1	F11-AS1	RARRES1
ALYREF	BMP6	FFAR1
HNRNPA3	RNASEH2A	FADS1
MUC16	ADM	CKMT2
NGB	PIK3C2A	RARA
NACA	INS	ACSL3
RUFY1	SETBP1	SLC9A1
SNRPC	MME	LPCAT1
SNRPD1	PDGFRA	NAMPT
USP44	MYORG	LARP4B
ATP5F1A	PRKAR1A	OSBPL8
ERH	GP9	ELOVL3
FAM120A	SCN2A	METRNL
TBC1D5	NES	FOXA1
WBP11	HTT	SOX15
RPL38	PGAP1	EIF2AK1
SNRPF	DDX58	SLC8A2
CNTNAP4	CTSB	ABCF1
PCBP3	SDHA	PPARGC1B
TEX264	AOC3	ELOVL6
RPL36A	MCFD2	AVP
YTHDF3	LOX	BDKRB2
ACTBL2	HPS5	INS
RUFY3	ODC1	ZNF536
ATP5F1B	HFE	ALOX15B
IGKC	ATP7A	NOTCH1
SNU13	NTRK2	NAPRT
KBTBD3	CD40LG	TSPO
RTL1	CREBBP	NODAL
KIAA1614	FAS	ANXA1
SRSF8	MIR21	SOX9
ABRAXAS2	MBL2	CCM2L
IGHG4	NPPB	APLP1
H2AC21	PRL	TOX3
TUBA4B	PF4	GSK3A
IGKV1-5	MIR210	DRD5
IGLV3-19	SYN3	ADORA1
LPIN1	IFNB1	TRIM24
NDUFS7	TUBB4A	NAV2
SIAH2	GPT	SHH
LPIN2	NPPA	UCHL1
CIAO1	TIMP1	WNT4
LPIN3	ITGB1BP1	ATP2B4
OTUD1	MIR146A	ADAM17
CIAO2A	ETV6	CETN2
TGFB2	WDR81	LEF1
UBR2	ATP1A2	PDE4D
SAT1	SMARCE1	ARRB1
AURKA	FZD4	ARRDC3
RIPK1	MYC	ADRB3
CASP8	HRAS	ADRA2B
CDKN2A	TRAPPC9	CALCA
MIR4715	ACSL4	ADRBK1
TGFB1	GLA	FGFR2
CFTR	MYD88	NCOA3
MIF	ELANE	GPER1
MUC1	MEFV	TPM1
TXNRD1	CSF1R	PHKG2
SF3B1	FCGR2B	TFAP2C
USP11	COL1A1	CETN1
ALOX15B	SMPD1	ARRB2
DIAPH3	ENPP1	AREG
ACSL3	SLC4A1	WNT5A
RBM10	EDNRA	RGS2
ANO6	HEPACAM	EDN2
SF3B2	TPP1	KCNA3
GUCY1A1	IVD	KCNA1
RNF113A	TRAF7	ADH1B
MIR7-1	TLR3	KCND3
YAP2	PIGA	KCNQ1
ZEB1	PML	CYGB
	FANCI	EDN1
	ISG15	CNTNAP4
	HMGB1	GRIN2A
	FLVCR2	SPARC
	NSD1	CRLF1
	CXCL10	ALDH1B1
	COL4A4	DARS
	MBP	MIP
	ANXA5	STX1A
	NKX2-1	NRXN2
	CDKN3	DAB2IP
	APOA1	POLA1
	VCAM1	DLG4
	RS1	PRKAB1
	EPOR	KCNA2
	ATL1	KCNC2
	RBPJ	KCND2
	IL2	GUCY1B3
	LEP	FBP1
	OXT	NRXN3
	IRF3	SHANK3
	AVP	OXT
	PRF1	RNASE4
	NR2F1	SLC17A7
	PTPN11	SORCS3
	NRAS	FADD
	AKT3	LEP
	MDH2	ANK3
	DAG1	RYR3
	CDK5	CYP2E1
	KCNMA1	RNASE1
	CD8A	ADH1A
	TH	TPO
	MED17	KCNC1
	LMAN1	KCNA4
	SLC6A4	DGKI
	GRIN2A	LRRC4B
	CST8	ACY3
	PTGS1	MAGI2
	CYP11B2	RAB3A
	SPG7	CYP11A1
	ERCC2	RNASE8
	GRN	SNTG2
	KIF14	NLGN1
	FOXE3	KCNE5
	EPAS1	ZPR1
	TBK1	ADH4
	STK25	ACY1
	PAX6	ALDH2
	LTA	KCNA10
	YWHAQ	ADH1C
	BACE2	KCNA7
	RET	KCNK4
	SLC35A1	ADH7
	ERCC1	AQP8
	ADRB2	ASPA
	APCS	APOE
	HSPB6	MC4R
	IL13	KCNIP2
	CD4	SCGB1A1
	BCL2	CACNA1D
	PTPN22	ALDH3B1
	ALG9	ALDH3B2
	MMACHC	GJA5
	XYLT1	KCND1
	RB1	KCNC3
	TBCD	KCNB1
	PYCR2	KCNB2
	SCN8A	KCNA6
	SPARC	IYD
	COL4A5	NFIB
	HPS4	ARX
	FUNDC2	NRXN1
	SPP1	SCN10A
	ACTB	GPX7
	STAT5B	OXTR
	TOMM40	RAPGEF2
	RLBP1	NKX2-1
	C9orf72	NPPA
	ARID1B	RNASE2
	NBEAL2	FAS
	CCDC88C	COL5A1
	KMT2A	C5
	NPY	UBR5
	ASXL1	PDGFB
	EIF2B5	RDH11
	HELLPAR	PRKCD
	COL5A1	NOX1
	MYLK	NEDD4
	DARS2	SRC
	MSH2	CYP19A1
	EDAR	CACNA1I
	PON1	PHB
	COX14	STAP1
	MMP1	CX3CR1
	LAMB1	CACNA1G
	STAT1	SERPINB3
	CXCL12	TGFB2
	MAP2	TNFAIP3
	JUN	CD34
	APC	TNFSF11
	CST4	FOXP3
	CNP	MMP28
	ATP6V0A2	RDH5
	EDNRB	HSD17B7
	CTC1	CRYM
	CST5	ATP1A1
	ATM	RBP3
	TFRC	ALDH1A3
	NPM1	RLBP1
	HLA-DPB1	RDH10
	ARFGEF2	ASCL1
	GSS	RETSAT
	LMNA	RDH12
	GAPDH	RDH14
	TCF4	RHO
	CYP27A1	THRA
	GLUL	DLX5
	ANGPT1	OPN5
	ASNS	RDH13
	ITM2C	DHRS4
	DRD2	RDH8
	DHFR	RS1
	SDHC	DHRS3
	IL17A	RBP1
	ESR1	LRAT
	ACP5	CTSH
	SCN3A	DHRS2
	REN	CBR3
	GATA1	THRB
	STK24	CBR1
	PTH
	EPRS1
	PUF60
	PDE4D
	BRCC3
	SLC2A10
	GANAB
	SLC25A13
	TSPO
	ERBB2
	VIM
	IL15
	MAP2K1
	CYP2C19
	OCLN
	ABCB1
	GYPA
	INSL6
	MBTPS2
	BGN
	LMNB1
	MIR126
	MYCN
	CHIT1
	CYP7B1
	BAX
	GYPC
	THBS1
	PMPCA
	CDKN2B-AS1
	CASP9
	MIR106B
	JAG1
	MIR29A
	SLC17A5
	CD34
	VCP
	COL4A3
	MVK
	KLF4
	BLOC1S3
	TBL1XR1
	PRSS23
	PIGQ
	HSPG2
	FOS
	GYPB
	KIAA1109
	BCOR
	COL4A2-AS2
	PDHA1
	AQP1
	SOX10
	A2M
	CAT
	HLA-A
	TLR2
	ACHE
	FIP1L1
	MAT2A
	PLA2G7
	LMX1B
	CYP11B1
	IKBKG
	RARA
	VPS11
	KMT2D
	GLB1
	WWOX
	PIGG
	HLA-DPA1
	H2AC18
	LBR
	LZTR1
	FGFR2
	MB
	OLIG2
	TSPAN12
	FANCD2
	CCL3
	AP3B1
	KCNJ5
	RPS27A
	DOCK6
	CNR1
	APC2
	JPH3
	CDH5
	HSPA4
	ABCA1
	CPB2
	MT-CO1
	TIMP2
	SLC35A2
	CAPN5
	CCNH
	WFS1
	TBX1
	STN1
	EML1
	NGF
	KIF1B
	IL12A
	TMEM107
	MIR15A
	HBA1
	NARS2
	IFNAR1
	F2R
	MAP3K3
	PCCB
	MFAP5
	CASP8
	HRH2
	EIF2AK2
	MKI67
	SOD2
	HYLS1
	SQSTM1
	SUMF1
	AIFM1
	CCL5
	BMP4
	CLCN2
	ALOX5
	CYCS
	CSTA
	NDP-AS1
	HMGCR
	IGFBP3
	PHF1
	DNMT1
	CDH23
	DLST
	GNA11
	FOXH1
	RDX
	SP1
	TIE1
	ABCC8
	CDKN2A
	TYROBP
	CD109
	MAP1B
	MMUT
	LIMK1
	MIR124-1
	TFPI
	STK11
	MIF
	YY1AP1
	PMS2
	GPX4
	SULT1A3
	MPDZ
	MAX
	ZEB2
	LRRC56
	PRODH
	MAPK14
	BLOC1S6
	HTR1A
	ERCC4
	IL3
	TIRAP
	GJA1
	HBG2
	HEG1
	EIF2B2
	SRC
	HEY2
	ADSL
	CCND1
	SMAD2
	MX1
	LOC107303340
	MMP8
	MIR155
	PLEC
	ZBTB16
	WIPF1
	NOTCH4
	LMBRD1
	ARVCF
	ARL13B
	FASLG
	MLH1
	FCGR2C
	BGLAP
	EIF2B1
	MIR223
	TMEM127
	ACKR1
	UCHL1
	CCR6
	CASP1
	MAN2B1
	PCNT
	CCL4
	CST7
	EIF2B4
	MTM1
	PPBP
	NCAM1
	ALG1
	ZFP30
	TBP
	DRD1
	F12
	SMTN
	RAP1A
	ACTG1
	CST6
	SLCO2A1
	DBH
	FKRP
	NFE2L2
	MSH6
	GJB2
	FGFR3
	GNAS
	PGBD3
	ATP6V1E1
	SZT2
	PCCA
	VIP
	RAP1B
	MYMY1
	MYMY3
	GATA2
	LGMN
	CST9L
	RARS1
	TRPM4
	EZR
	CRH
	PEX1
	KANSL1
	ST3GAL3
	TENT5A
	ACAD9
	RAB18
	MAF
	CYP3A4
	ERCC5
	FOXG1
	SLC5A6
	TF
	PRKN
	B2M
	BEST1
	PHACTR1
	POLR1C
	XDH
	CISH
	LOC106099062
	LOC107133510
	RHOA
	NGB
	HGF
	MIR29B1
	C4A
	PVALB
	PPARG
	POMC
	CC2D2A
	HCFC1
	SNORD118
	PC
	TBXA2R
	NLRP3
	MAG
	YWHAG
	TYMP
	MIR143
	ITGB1
	PARP1
	MYO7A
	COG2
	UBTF
	CDKN2B
	MAPK3
	NRP1
	OTC
	SORL1
	SCARB2
	NFIX
	ERVW-1
	WNT3
	EP300
	BCL2L1
	ZMPSTE24
	CHMP1A
	PRDX1
	EIF2B3
	NID1
	HSPA5
	MBTPS1
	TERC
	RAP2A
	NCF1
	AIMP2
	STX1A
	TUBB3
	LOC102724153
	TICAM1
	ERMARD
	IL5
	RTEL1
	HTR2A
	COL5A2
	PARK7
	IL23R
	LAMA2
	AGER
	ALPL
	NTF3
	SDHAF2
	PLOD3
	DES
	NTRK1
	MAPK8
	KCNA1
	KMT2C
	DYNC2H1
	MAN1B1
	CEP55
	SLC12A2
	POMGNT1
	SBDS
	NFKB1
	DCC
	SOX2
	ADIPOQ
	RALGAPA1
	IL12B
	EXOSC3
	C3
	GAA
	CAMTA1
	ALG13
	RAPGEF2
	CSF2
	DNAJC6
	RNF168
	CCL18
	TINF2
	TLR9
	SLC2A3
	NUS1
	LPL
	YWHAE
	CDH15
	TMTC3
	PRKCSH
	SEC63
	CLTC
	EDN3
	ARHGAP31
	ADAMTSL1
	ZPLD1
	TOR1A
	DPYD
	SPTBN4
	CTCF
	AP5Z1
	MIR328
	GRM1
	RELA
	NDUFAF2
	LCN2
	LCAT
	KLF2
	LOC110806306
	KITLG
	CRPPA
	BTD
	BCHE
	NBN
	IL1R1
	NR3C1
	RAB11A
	SET
	CDC42
	ATP7B
	IL6-AS1
	MSX2
	PET100
	NPC2
	NOTCH2
	AIMP1
	GRIA2
	IL6R
	CUX1
	SUOX
	SERPINF1
	NEFL
	CFLAR
	CISD2
	CCL11
	FAM222B
	CCK
	CD79A
	TUBB
	HLA-DQB1
	ECE1
	EZH2
	OLR1
	CDK6
	TJP1
	GRIA1
	IL33
	MIR107
	MFN2
	NDST1
	EFEMP2
	CD19
	PIGT
	MIRLET7C
	DNASE1L3
	MIR16-1
	EXOSC9
	SLC1A3
	GNRH1
	ASS1
	SLC25A11
	CARD14
	ENTPD1
	STK26
	HABP2
	CBL
	OCA2
	CEP290
	PDP1
	COG6
	CRYAA
	CD55
	CXCR4
	FSHR
	USH2A
	MTR
	PAH
	PTGIS
	FAT4
	ITGAV
	GTPBP1
	APOC1
	DROSHA
	ADCYAP1
	KDM1A
	PTK2
	ADCY10
	PRPH2
	ADORA1
	TNXB
	TNC
	PEX16
	TLR8
	POLG2
	AP1S2
	ITGAM
	KRT18
	TNFRSF1B
	ABCC1
	AIF1
	HERC2
	SUGCT
	KRI1
	RASIP1
	OR2AG1
	CALB2
	CDKN1B
	SIRT1
	OTX2
	CNOT1
	SIN3A
	DNM1L
	ARG1
	PIK3CG
	PIK3R2
	CHGA
	GLI3
	HPGD
	FUS
	JAG2
	MAPK10
	MET
	PLAUR
	LGALS3
	DIAPH1
	LOC113748416
	CNTF
	SOX17
	RYR1
	MED12
	VTN
	C1S
	BIN1
	TUBGCP6
	COL18A1
	MIR145
	HAVCR2
	EOGT
	MDM2
	ALDH18A1
	PTPRC
	PKHD1
	XIAP
	CHEK2
	RBFOX3
	MSTO1
	RAC1
	ANXA2
	RASGRP2
	GP2
	LOC100507346
	LMNB2
	LAMA3
	VPS37A
	ADA
	NAGLU
	AFP
	DNMT3B
	SCUBE1
	CAMK2G
	WNT1
	VPS33B
	STAT4
	UFD1
	FOXP3
	KCNQ1
	SAMD9
	ITGB2
	TBCK
	APBB1IP
	C1R
	CX3CR1
	HCRT
	ASH1L
	SNRPN
	DSE
	HSPA1A
	ACADM
	FTO
	CD44
	AHCY
	KDM5B
	DKC1
	UNC93B1
	CACNA1C
	CCL7
	HSPA8
	HIC1
	DDX3X
	ABCA4
	FLVCR1
	LPA
	MAP2K5
	MAVS
	CS
	NTS
	NEDD4L
	IL11
	GNB3
	MMP12
	TRAF3
	ERAP1
	RAD51
	OFD1
	CD59
	HSD3B7
	YY1
	FCGR3B
	PDGFA
	ETFDH
	ADRB1
	IL7
	SLC35C1
	ACVR1
	ZC4H2
	SEC24C
	IL17RD
	ERCC3
	MSTN
	TFAP2A
	ALOX12B
	PNPO
	MIR125A
	STRIP2
	EPHB2
	LRP2
	TMEM67
	ZNF408
	CASP10
	MT-CYB
	CST2
	GZMB
	H3C1
	S100A8
	HAR1B
	IGF1R
	MGP
	CDKN1A
	ACER3
	MIR27A
	MYO5A
	RBM8A
	AGTR2
	ATP2B3
	ABAT
	NTN1
	CCR1
	CHUK
	SDC1
	NEFH
	USH1G
	DNAJC3
	CIC
	CLP1
	EFEMP1
	GAST
	MOB4
	ALDOB
	CD40
	CACNA1E
	MN1
	MIR222
	ELOVL4
	MIR320A
	MAP4K4
	NDUFS4
	MIR22
	ALDH2
	CCDC86
	MALAT1
	COG1
	MAOA
	PON2
	HEY1
	LEPR
	IAPP
	AGGF1
	GSTP1
	CYP26C1
	SOCS3
	STRN
	SLC25A4
	IFNGR1
	LIF
	SLC34A1
	ICOSLG
	WG
	PXDN
	CYP1B1
	MCCC2
	KDM6A
	RPGRIP1L
	IGF2
	HMGCL
	SREBF1
	TGM2
	PCNA
	BRCA1
	MMADHC
	MEG3
	CHI3L1
	FAH
	KIF11
	DAPK1
	SLMAP
	RAF1
	STRIP1
	AIRE
	IFNA2
	ARF1
	KLRC4
	UBAC2
	IL12A-AS1
	DLAT
	SGSH
	POT1
	HSPD1
	MKS1
	SOD3
	MAP2K2
	NOD2
	ATP6AP2
	NEAT1
	ACTC1
	PCYT2
	GH1
	SCUBE2
	PGR
	ACADS
	VDR
	BCR
	CYP19A1
	CXCR3
	CYP3A5
	SIX5
	PTGDS
	TUBGCP4
	NGFR
	KCNT1
	TNFRSF11B
	CNNM2
	IL2RA
	MIR106A
	HNF1B
	ALG2
	CTSG
	JMJD1C
	CTSL
	FERMT3
	TP73
	PMS1
	HSP90AA1
	DLL3
	ZFYVE16
	ABL1
	ATP10A
	CASR
	SUN1
	SELL
	CFTR
	SERPINH1
	LOC106799833
	BUB1B
	NDUFV2
	TNNT2
	PITRM1
	NEU1
	ADORA3
	LIPC
	RGS12
	NDUFA6
	ALX4
	CYBB
	MINK1
	SCT
	PEX2
	ATP4A
	RTN4
	AP3D1
	STRN4
	TNFSF13B
	TYR
	HIRA
	MIR181A1
	GPSM2
	FLT3
	DPAGT1
	MAP4K2
	TMEM216
	TFF1
	BCKDHB
	CDK1
	SKI
	CUL4B
	TREM1
	L2HGDH
	MIR221
	ANKIB1
	MIR132
	HESX1
	PTCH2
	WASHC5
	IKZF1
	UQCRFS1
	MLLT1
	STING1
	EFNB2
	GAP43
	MIR34B
	CD163
	EPHX2
	ADAMTS4
	PYY
	PLA2G2A
	LAMC2
	RREB1
	WASHC4
	SMAD1
	DPH1
	MCOLN1
	SMARCA2
	WT1
	TAC1
	MLH3
	CGAS
	PPARA
	IRF7
	MAOB
	CYGB
	BBS10
	RUNX2
	SRRT
	SYCE2
	CETP
	PRLR
	NDUFS3
	CACNA1S
	GPX1
	PCSK9
	SERPIND1
	TCIRG1
	PARN
	SYK
	MIR205
	MIRLET7A3
	TARS1
	KIF23
	EXO1
	MNRI
	CSNK2B
	IL16
	PREX2
	NRIP3-DT
	LARGE2
	IGF2R
	MYMY4
	CLCN1
	EPCAM
	CLDN3
	SIKE1
	STAG2
	NAMPT
	IRF1
	MIR361
	CDKN1C
	RBBP8
	CTBP1
	ECHS1
	FSCN2
	PRKCD
	YAP1
	PDYN
	SLC12A5
	MIR28
	GJB1
	HEYL
	RBP4
	CCR5
	GLUD1
	NAGS
	VRK1
	NLRC4
	NTF4
	LYST
	B4GALT1
	HBA2
	PTX3
	GGT1
	HTR3A
	PSTPIP1
	SMC3
	USP7
	ASAH1
	ASL
	KCTD19
	SMAD9
	SF3B1
	ALDH3A2
	MYOM2
	APOC3
	IL10RA
	FAN1
	PIGV
	RPS20
	GCH1
	CERT1
	CDK4
	RFT1
	FAM20C
	ATP1A1
	BMP10
	IL9
	TRH
	NRGN
	GSTM1
	KRT14
	LIG4
	RAD21
	TSPAN2
	HNF4A
	LOC110806262
	MIR451A
	P4HB
	NECTIN2
	QDPR
	CAV1
	TXN
	MARCKS
	SNAP23
	RINT1
	KL
	BCKDHA
	BCORL1
	IDO1
	CACNB1
	CA3-AS1
	SLC7A7
	CACNA1H
	PTPA
	COL2A1
	WRN
	EGR1
	SLC12A3
	ARID1A
	CPS1
	FCGR1A
	XPA
	AKR1A1
	AP1S1
	DZIP1L
	TCTN2
	MTFMT
	CDKN2C
	AHSP
	CHST14
	PIGY
	MMP13
	M6PR
	FGF1
	RASA2
	LOC105371049
	IFIT1
	FOXF1
	STARD13
	GFM1
	MIR23A
	SUZ12
	TPP2
	CTSK
	SHBG
	ATP12A
	PGF
	FOXJ1
	SEMA4A
	ETFA
	FNBP4
	LOC117125594
	MIR142
	BSG
	TLR7
	APEX1
	NDUFA9
	FOXC1
	SLC25A15
	AHSG
	CYP1A2
	HRH1
	LOC105372273
	ERCC8-AS1
	LOC113939944
	PICALM
	FGF23
	MPI
	CACNB4
	KLK1
	GTF2IRD1
	COL7A1
	OAT
	SCP2
	PAPPA
	PTK2B
	TAF1
	TMCO1
	PNMT
	PEX12
	HLA-DQA1
	LINC00929
	IRF5
	LRPAP1
	GHRL
	ACD
	ICAM2
	MIR326
	CBFB
	HDAC1
	POMGNT2
	SSTR2
	KCNH5
	ZIC1
	TRPV4
	ARMC8
	ZNF621
	KLHDC7A
	SERPINB2
	HAVCR1
	CYSLTR2
	MOG
	ADAM17
	ESR2
	COX5A
	PCSK2
	CPOX
	PRKCA
	KIAA0319L
	CRKL
	ALDH1L1
	INSR
	PTPRN2
	RARB
	NUP214
	POMK
	NPPC
	YARS1
	TMEM231
	ABCG2
	B9D1
	KRT7
	SP110
	PPP1R12A
	RNASEL
	MIR96
	CRYAB
	ALDH7A1
	BDKRB2
	CLDN5
	IFT80
	MOGS
	MIR17
	TNFRSF8
	SIL1
	AR
	CHRNA7
	SGK1
	ETS1
	SOCS1
	NFKBIA
	SMAD5
	CCR2
	CD68
	CRBN
	SNHG15
	IGFBP2
	CYBA
	PRKAR1B
	MIR93
	LTF
	HAMP
	PAEP
	AGRN
	SETD5
	MIR3177
	TOLLIP
	TRAF6
	PDE4A
	KRT5
	ENO1
	SCNN1A
	IL27
	BICC1
	ATOH7
	MGMT
	IGHE
	HSPB1
	DPYD-AS1
	MIR1225
	MIR6511B1
	CSF1
	APAF1
	CACNB2
	NPHP3
	CCND2
	HTR2C
	TUBA1B
	DOCK8-AS1
	ANTXR1
	FCGR3A
	FADD
	TNNI3
	ALG8
	DNAJB11
	SNHG6
	ZEB1-AS1
	CFAP43
	CMC4
	MIR181C
	BLOC1S1
	GOT1
	TRPC3
	ID2
	ACY1
	HLA-C
	MARVELD3
	STIM1
	HARS1
	GAL
	IL1RAPL2
	CSF3R
	IQSEC1
	UGT1A1
	TJP2
	SYNE1
	VPS16
	SORT1
	TRNT1
	BECN1
	TRPC1
	NR1H2
	ADCY5
	DEPDC5
	NSD2
	PIK3R1
	KCP
	TTLL11
	LINC00336
	LEF1-AS1
	LINC00323
	LINC00667
	LINC01139
	FAM66B
	LINC00596
	LINC01020
	SMIM2-IT1
	TTTY7
	LINC01538
	LINC01204
	SPRY4-AS1
	LINC01798
	LINC01762
	LINC01721
	ACOT7
	SRF
	DDOST
	SBF1
	IGFBP7
	IL2RB
	NPHP1
	CKB
	DIP2C
	HNRNPA1
	PITX2
	AHI1
	TIMM8A
	BIRC5
	RPGR
	ADRA2A
	CD52
	STK36
	PDPN
	CCN2
	NCAPH
	NQO1
	SNAP25
	CXCL11
	ACADVL
	LAMP1
	ANKRD26
	HADHA
	CYP4F2
	CFP
	DNAH8
	VCL
	REST
	DDC
	AXIN1
	HYDIN
	PYCR1
	ERF
	PPIG
	FANCA
	RETN
	PLVAP
	MIR186
	U2AF1
	EIF2S1
	MCC
	NDUFAF5
	SOX4
	ITIH4
	CELSR1
	PRKCZ
	LOC100506321
	CLEC5A
	SLC7A8
	FBN2
	CLEC4M
	GARS1
	CCL26
	IRAK1
	MIR25
	VPS33A
	GUSB
	FYN
	CD81
	ITPK1
	CSNK2A1
	ITGB8
	CHKA
	TNFRSF11A
	APLP2
	BMP7
	NCOR2
	MIR195
	GREM1
	UFC1
	UHRF1
	SCARF2
	CYB5A
	ROS1
	BST2
	MIR125B1
	TGFA
	MIR19A
	ANO5
	CASP7
	MRE11
	AIP
	AKAP12
	IL4R
	NFIA
	MMP14
	KAT6A
	DMD
	CD63
	NRG1
	TUBB1
	IFITM5
	JSRP1
	S100A1
	CALCR
	CEBPA
	FANCC
	SS18L1
	MPZ
	COL11A1
	FBLN5
	FKBP10
	RHO
	SAMD9L
	HDAC9
	SEC22B
	CALCRL
	ACE2
	WNT9B
	EIF2AK1
	BMP1
	CA1
	APOD
	CACNA1F
	MAMLD1
	PROM1
	TLR1
	C1QBP
	SOX11
	GATAD2B
	MIR9-1
	CXCL1
	POSTN
	BMP2
	RTEL1-TNFRSF6B
	TNFSF11
	TNFSF10
	GP5
	MIAT
	CRHR1
	RXYLT1
	SHOC2
	CGA
	CLCN7
	SUN2
	KDM4C
	BLVRB
	COG8
	RNASE3
	MIR200A
	TYMS
	PROP1
	NSMCE3
	LINC01194
	CYP2B6
	IFT88
	UGT8
	SERPINE2
	PRKDC
	DDX41
	MIR181A2
	COX5B
	SPTBN5
	FTL
	SLC12A1
	SLC8A1
	CCER2
	CXCL9
	ABCA3
	ABCC2
	ID1
	RAB7A
	ABCG8
	ZNF607
	NEDD4
	JAK1
	TCN2
	XPC
	ARL6IP6
	POLR2A
	DGKQ
	GAS7
	PRKCQ
	OPRM1
	MIR224
	TSPAN9
	HSPA9
	RNU4ATAC
	MOV10
	LAMP2
	MIR199A1
	PLCB4
	IPO8
	CYP2D6
	DPYSL2
	CRB1
	ADH1B
	HLA-DRB5
	OR1L1
	TGM6
	LYVE1
	GJA5
	CYP2E1
	MIR144
	LTBP2
	C5
	RRAS
	STUB1
	STMN2
	RHEB
	GPC3
	PMF1
	DPYS
	ACO1
	CDH4
	ID4
	IRS1
	ANPEP
	MIR181B1
	HIBCH
	FBLN1
	ASCL1
	KIR2DL3
	ROBO4
	SIGMAR1
	P2RX3
	CPLX2
	KAT8
	HDAC6
	NDUFB4
	STAT5A
	AKAP5
	RPS6
	HPRT1
	DDB2
	RPL36A-HNRNPH2
	CYP4A11
	ROCK1
	RSAD2
	PMF1-BGLAP
	SRFBP1
	LEF1
	CCT2
	MIR199B
	PSMA4
	LOC111365141
	PANX2
	LOC109610631
	WDR37
	DPP4
	UTS2
	ARID2
	IFI27
	CACNB3
	FRMD4A
	CRABP1
	VCAN
	LYN
	MRC1
	NPHS1
	KCNK17
	MROS
	GRB2
	NHP2
	PXN
	CFHR2
	GSK3B
	CLEC4G
	PENK
	SRSF2
	RPS6KB1
	HOTAIR
	CLEC7A
	MIR191
	GATA4
	CXCL2
	CSTL1
	MIRLET7E
	SPTBN1
	MIR18A
	ADH1C
	CD177
	SMARCC2
	WNK2
	KIAA0753
	RAB27A
	HPX
	TBL3
	RECK
	BUB1
	PLCG1
	LDHC
	BBS1
	SH2D1A
	FZD6
	SLIT2
	TMEM38B
	CREB3L1
	KDELR2
	SP7
	P3H1
	SLC9B1
	FAM189A1
	CFAP92
	GFND1
	PALB2
	CBY1
	AXL
	ADAMTS1
	CMA1
	MYOD1
	CD47
	CYP1A1
	TGM1
	SAG
	PRMT7
	SCARB1
	HMOX2
	TNFRSF12A
	TRIM37
	MEF2D
	CEBPB
	VEGFC
	SARM1
	CDK2
	RPE65
	CCR3
	DDAH2
	PIEZO2
	PCNP
	SEMA3F
	SIK3
	SIGLEC5
	SLC35A3
	EIF2S3
	FANCB
	PLEK
	VANGL2
	GDF6
	CELF1
	CXCR2
[truncated: 2,339 more rows]

## Sheet: da xue teng
Mol ID	Molecule name	Target name	gene
MOL007923	2-(4-hydroxyphenyl)ethyl (E)-3-(4-hydroxyphenyl)prop-2-enoate	Peroxisome proliferator activated receptor gamma	PPARG
MOL007923	2-(4-hydroxyphenyl)ethyl (E)-3-(4-hydroxyphenyl)prop-2-enoate	Leukotriene A-4 hydrolase	LTA4H
MOL007923	2-(4-hydroxyphenyl)ethyl (E)-3-(4-hydroxyphenyl)prop-2-enoate	Amine oxidase [flavin-containing] B	MAOB
MOL007923	2-(4-hydroxyphenyl)ethyl (E)-3-(4-hydroxyphenyl)prop-2-enoate	Trypsin-1	PRSS1
MOL007923	2-(4-hydroxyphenyl)ethyl (E)-3-(4-hydroxyphenyl)prop-2-enoate	Estrogen receptor	ESR1
MOL007923	2-(4-hydroxyphenyl)ethyl (E)-3-(4-hydroxyphenyl)prop-2-enoate	Beta-2 adrenergic receptor	ESR1
MOL007923	2-(4-hydroxyphenyl)ethyl (E)-3-(4-hydroxyphenyl)prop-2-enoate	Cyclin-A2	ADRB2
MOL000359	sitosterol	Progesterone receptor	CCNA2
MOL000359	sitosterol	Nuclear receptor coactivator 2	PGR
MOL000359	sitosterol	Mineralocorticoid receptor	NR3C2
MOL000358	beta-sitosterol	Progesterone receptor	#N/A
MOL000358	beta-sitosterol	Nuclear receptor coactivator 2	NCOA2
MOL000358	beta-sitosterol	Prostaglandin G/H synthase 1	PTGS1
MOL000358	beta-sitosterol	Prostaglandin G/H synthase 2	PTGS2
MOL000358	beta-sitosterol	Heat shock protein HSP 90	#N/A
MOL000358	beta-sitosterol	Phosphatidylinositol-4,5-bisphosphate 3-kinase catalytic subunit, gamma isoform	PIK3CG
MOL000358	beta-sitosterol	Potassium voltage-gated channel subfamily H member 2	KCNH2
MOL000358	beta-sitosterol	mRNA of PKA Catalytic Subunit C-alpha	#N/A
MOL000358	beta-sitosterol	Dopamine D1 receptor	Dop1R1
MOL000358	beta-sitosterol	Muscarinic acetylcholine receptor M3	CHRM3
MOL000358	beta-sitosterol	Muscarinic acetylcholine receptor M1	CHRM1
MOL000358	beta-sitosterol	Sodium channel protein type 5 subunit alpha	SCN5A
MOL000358	beta-sitosterol	Gamma-aminobutyric-acid receptor alpha-2 subunit	Gabra2
MOL000358	beta-sitosterol	Muscarinic acetylcholine receptor M4	CHRM4
MOL000358	beta-sitosterol	CGMP-inhibited 3',5'-cyclic phosphodiesterase A	PDE3A
MOL000358	beta-sitosterol	5-hydroxytryptamine 2A receptor	HTR2A
MOL000358	beta-sitosterol	Gamma-aminobutyric-acid receptor alpha-5 subunit	Gabra5
MOL000358	beta-sitosterol	Alpha-1A adrenergic receptor	ADRA1A
MOL000358	beta-sitosterol	Gamma-aminobutyric-acid receptor alpha-3 subunit	Gabra3
MOL000358	beta-sitosterol	Muscarinic acetylcholine receptor M2	CHRM2
MOL000358	beta-sitosterol	Alpha-1B adrenergic receptor	Adra1b
MOL000358	beta-sitosterol	Beta-2 adrenergic receptor	#N/A
MOL000358	beta-sitosterol	Neuronal acetylcholine receptor subunit alpha-2	CHRNA2
MOL000358	beta-sitosterol	Sodium-dependent serotonin transporter	SerT
MOL000358	beta-sitosterol	Mu-type opioid receptor	OPRM1
MOL000358	beta-sitosterol	Gamma-aminobutyric acid receptor subunit alpha-1	GABRA1
MOL000358	beta-sitosterol	Neuronal acetylcholine receptor protein, alpha-7 chain	CHRNA7
MOL000358	beta-sitosterol	Cytochrome P450-cam	camC
MOL000358	beta-sitosterol	Apoptosis regulator Bcl-2	BCL2
MOL000358	beta-sitosterol	Apoptosis regulator BAX	BAX
MOL000358	beta-sitosterol	Caspase-9	CASP9
MOL000358	beta-sitosterol	Transcription factor AP-1	JUN
MOL000358	beta-sitosterol	Caspase-3	CASP3
MOL000358	beta-sitosterol	Caspase-8	CASP8
MOL000358	beta-sitosterol	Protein kinase C alpha type	PRKCA
MOL000358	beta-sitosterol	Transforming growth factor beta-1	PRKCA
MOL000358	beta-sitosterol	Serum paraoxonase/arylesterase 1	PON1
MOL000358	beta-sitosterol	Microtubule-associated protein 2	Map2
MOL000096	(-)-catechin	Prostaglandin G/H synthase 1	PTGS1
MOL000096	(-)-catechin	Estrogen receptor	ESR1
MOL000096	(-)-catechin	Prostaglandin G/H synthase 2	PTGS2
MOL000096	(-)-catechin	Heat shock protein HSP 90	#N/A
MOL000096	(-)-catechin	Beta-lactamase	blaC
MOL000096	(-)-catechin	mRNA of PKA Catalytic Subunit C-alpha	#N/A
MOL000096	(-)-catechin	Nuclear receptor coactivator 2	NCOA2
MOL000096	(-)-catechin	Calmodulin	CALM1
MOL000096	(-)-catechin	Fatty acid synthase	FASN
MOL000096	(-)-catechin	Peroxisome proliferator-activated receptor gamma	PPARG
MOL000096	(-)-catechin	Krueppel-like factor 7	KLF7

## Sheet: huang qi
Mol ID	Molecule name	Target name	gene
MOL000387	Bifendate	Prostaglandin G/H synthase 2	PTGS2
MOL000387	Bifendate	Vascular endothelial growth factor receptor 2	KDR
MOL000387	Bifendate	Hepatocyte growth factor receptor	MET
MOL000387	Bifendate	Heat shock protein HSP 90	#N/A
MOL000387	Bifendate	Calcium-activated potassium channel subunit alpha 1	KCNMA1
MOL000387	Bifendate	Prostaglandin G/H synthase 1	PTGS1
MOL000387	Bifendate	DNA topoisomerase II	TOP2
MOL000033	(3S,8S,9S,10R,13R,14S,17R)-10,13-dimethyl-17-[(2R,5S)-5-propan-2-yloctan-2-yl]-2,3,4,7,8,9,11,12,14,15,16,17-dodecahydro-1H-cyclopenta[a]phenanthren-3-ol	Progesterone receptor	PGR
MOL000379	9,10-dimethoxypterocarpan-3-O-β-D-glucoside	Prostaglandin G/H synthase 2	PTGS2
MOL000379	9,10-dimethoxypterocarpan-3-O-β-D-glucoside	DNA topoisomerase II	TOP2
MOL000379	9,10-dimethoxypterocarpan-3-O-β-D-glucoside	Nuclear receptor coactivator 2	NCOA2
MOL000296	hederagenin	Progesterone receptor	PGR
MOL000296	hederagenin	Nuclear receptor coactivator 2	NCOA2
MOL000296	hederagenin	Muscarinic acetylcholine receptor M3	CHRM3
MOL000296	hederagenin	Muscarinic acetylcholine receptor M1	CHRM1
MOL000296	hederagenin	Gamma-aminobutyric-acid receptor alpha-2 subunit	GABRA2
MOL000296	hederagenin	Gamma-aminobutyric-acid receptor alpha-3 subunit	GABRA3
MOL000296	hederagenin	Muscarinic acetylcholine receptor M2	CHRM2
MOL000296	hederagenin	Alpha-1B adrenergic receptor	ADRA1B
MOL000296	hederagenin	Gamma-aminobutyric acid receptor subunit alpha-1	GABRA1
MOL000296	hederagenin	Glutamate receptor 2	GRIA2
MOL000296	hederagenin	Gamma-aminobutyric-acid receptor subunit alpha-6	GABRA6
MOL000296	hederagenin	Gamma-aminobutyric-acid receptor alpha-5 subunit	GABRA5
MOL000296	hederagenin	Ig gamma-1 chain C region	#N/A
MOL000296	hederagenin	Alcohol dehydrogenase 1B	#N/A
MOL000296	hederagenin	Alcohol dehydrogenase 1C	#N/A
MOL000296	hederagenin	Lysozyme	LYZD1
MOL000296	hederagenin	Nicotinate-nucleotide--dimethylbenzimidazole phosphoribosyltransferase	#N/A
MOL000296	hederagenin	Prostaglandin G/H synthase 1	PTGS1
MOL000296	hederagenin	Sodium channel protein type 5 subunit alpha	SCN5A
MOL000296	hederagenin	Prostaglandin G/H synthase 2	PTGS2
MOL000296	hederagenin	Retinoic acid receptor RXR-alpha	RXRA
MOL000296	hederagenin	CGMP-inhibited 3',5'-cyclic phosphodiesterase A	PDE3A
MOL000296	hederagenin	Sodium-dependent noradrenaline transporter	SLC6A2
MOL000296	hederagenin	Cytochrome P450-cam	#N/A
MOL000442	1,7-Dihydroxy-3,9-dimethoxy pterocarpene	Prostaglandin G/H synthase 2	PTGS2
MOL000442	1,7-Dihydroxy-3,9-dimethoxy pterocarpene	Retinoic acid receptor RXR-alpha	RXRA
MOL000442	1,7-Dihydroxy-3,9-dimethoxy pterocarpene	Heat shock protein HSP 90	#N/A
MOL000442	1,7-Dihydroxy-3,9-dimethoxy pterocarpene	Trypsin-1	PRSS1
MOL000422	kaempferol	Nitric oxide synthase, inducible	NOS2
MOL000422	kaempferol	Prostaglandin G/H synthase 1	PTGS1
MOL000422	kaempferol	Androgen receptor	AR
MOL000422	kaempferol	Peroxisome proliferator activated receptor gamma	PPARG
MOL000422	kaempferol	Prostaglandin G/H synthase 2	PTGS2
MOL000422	kaempferol	Heat shock protein HSP 90	#N/A
MOL000422	kaempferol	Phosphatidylinositol-4,5-bisphosphate 3-kinase catalytic subunit, gamma isoform	PIK3CG
MOL000422	kaempferol	mRNA of PKA Catalytic Subunit C-alpha	#N/A
MOL000422	kaempferol	Nuclear receptor coactivator 2	NCOA2
MOL000422	kaempferol	Dipeptidyl peptidase IV	DPP4
MOL000422	kaempferol	Trypsin-1	PRSS1
MOL000422	kaempferol	Progesterone receptor	PGR
MOL000422	kaempferol	Thrombin	#N/A
MOL000422	kaempferol	Muscarinic acetylcholine receptor M1	CHRM1
MOL000422	kaempferol	Nitric-oxide synthase, endothelial	NOS3
MOL000422	kaempferol	Gamma-aminobutyric-acid receptor alpha-2 subunit	GABRA2
MOL000422	kaempferol	Acetylcholinesterase	ACHE
MOL000422	kaempferol	Sodium-dependent noradrenaline transporter	SLC6A2
MOL000422	kaempferol	Muscarinic acetylcholine receptor M2	CHRM2
MOL000422	kaempferol	Alpha-1B adrenergic receptor	ADRA1B
MOL000422	kaempferol	Gamma-aminobutyric acid receptor subunit alpha-1	GABRA1
MOL000422	kaempferol	DNA topoisomerase II	TOP2
MOL000422	kaempferol	Coagulation factor VII	F7
MOL000422	kaempferol	Calmodulin	CALM1
MOL000422	kaempferol	Transcription factor p65	RELA
MOL000422	kaempferol	Inhibitor of nuclear factor kappa-B kinase subunit beta	IKBKB
MOL000422	kaempferol	RAC-alpha serine/threonine-protein kinase	AKT1
MOL000422	kaempferol	Apoptosis regulator Bcl-2	BCL2
MOL000422	kaempferol	Apoptosis regulator BAX	BAX
MOL000422	kaempferol	Tumor necrosis factor	TNF
MOL000422	kaempferol	Transcription factor AP-1	JUN
MOL000422	kaempferol	Activator of 90 kDa heat shock protein ATPase homolog 1	AHSA1
MOL000422	kaempferol	Caspase-3	CASP3
MOL000422	kaempferol	Mitogen-activated protein kinase 8	MAPK8
MOL000422	kaempferol	Xanthine dehydrogenase/oxidase	XDH
MOL000422	kaempferol	Interstitial collagenase	MMP1
MOL000422	kaempferol	Signal transducer and activator of transcription 1-alpha/beta	STAT1
MOL000422	kaempferol	Cell division control protein 2 homolog	#N/A
MOL000422	kaempferol	Peroxisome proliferator-activated receptor gamma	PPARG
MOL000422	kaempferol	Heme oxygenase 1	HMOX1
MOL000422	kaempferol	Cytochrome P450 3A4	CYP3A4
MOL000422	kaempferol	Cytochrome P450 1A2	CYP1A2
MOL000422	kaempferol	Cytochrome P450 1A1	CYP1A1
MOL000422	kaempferol	Intercellular adhesion molecule 1	ICAM1
MOL000422	kaempferol	E-selectin	SELE
MOL000422	kaempferol	Vascular cell adhesion protein 1	VCAM1
MOL000422	kaempferol	Nuclear receptor subfamily 1 group I member 2	NR1I2
MOL000422	kaempferol	Cytochrome P450 1B1	CYP1B1
MOL000422	kaempferol	Arachidonate 5-lipoxygenase	ALOX5AP
MOL000422	kaempferol	Hyaluronan synthase 2	HAS2
MOL000422	kaempferol	Glutathione S-transferase P	GSTP1
MOL000422	kaempferol	Aryl hydrocarbon receptor	AHR
MOL000422	kaempferol	26S proteasome non-ATPase regulatory subunit 3	PSMD3
MOL000422	kaempferol	Solute carrier family 2, facilitated glucose transporter member 4	SLC2A4
MOL000422	kaempferol	Nuclear receptor subfamily 1 group I member 3	NR1I3
MOL000422	kaempferol	Insulin receptor	INSR
MOL000422	kaempferol	Type I iodothyronine deiodinase	DIO1
MOL000422	kaempferol	Serine/threonine-protein phosphatase 2B catalytic subunit alpha isoform	PPP3CA
MOL000422	kaempferol	Peroxidase C1A	#N/A
MOL000422	kaempferol	Glutathione S-transferase Mu 1	GSTM1
MOL000422	kaempferol	Glutathione S-transferase Mu 2	GSTM2
MOL000422	kaempferol	Aldo-keto reductase family 1 member C3	AKR1C3
MOL000422	kaempferol	Antileukoproteinase	SLPI
MOL000098	quercetin	Prostaglandin G/H synthase 1	PTGS1
MOL000098	quercetin	Androgen receptor	AR
MOL000098	quercetin	Peroxisome proliferator activated receptor gamma	PPARG
MOL000098	quercetin	Prostaglandin G/H synthase 2	PTGS2
MOL000098	quercetin	Heat shock protein HSP 90	#N/A
MOL000098	quercetin	Phosphatidylinositol-4,5-bisphosphate 3-kinase catalytic subunit, gamma isoform	PIK3CG
MOL000098	quercetin	Nuclear receptor coactivator 2	NCOA2
MOL000098	quercetin	Dipeptidyl peptidase IV	DPP4
MOL000098	quercetin	Aldose reductase	#N/A
MOL000098	quercetin	Trypsin-1	PRSS1
MOL000098	quercetin	DNA topoisomerase II	TOP2
MOL000098	quercetin	Thrombin	#N/A
MOL000098	quercetin	Potassium voltage-gated channel subfamily H member 2	KCNH2
MOL000098	quercetin	Sodium channel protein type 5 subunit alpha	SCN5A
MOL000098	quercetin	Coagulation factor Xa	F10
MOL000098	quercetin	Beta-2 adrenergic receptor	ADRB2
MOL000098	quercetin	Stromelysin-1	MMP3
MOL000098	quercetin	mRNA of PKA Catalytic Subunit C-alpha	#N/A
MOL000098	quercetin	Coagulation factor VII	F7
MOL000098	quercetin	Nitric-oxide synthase, endothelial	NOS3
MOL000098	quercetin	Retinoic acid receptor RXR-alpha	RXRA
MOL000098	quercetin	Acetylcholinesterase	ACHE
MOL000098	quercetin	Gamma-aminobutyric acid receptor subunit alpha-1	GABRA1
MOL000098	quercetin	Amine oxidase [flavin-containing] B	MAOB
MOL000098	quercetin	Transcription factor p65	RELA
MOL000098	quercetin	Epidermal growth factor receptor	EGFR
MOL000098	quercetin	RAC-alpha serine/threonine-protein kinase	AKT1
MOL000098	quercetin	Vascular endothelial growth factor A	VEGFA
MOL000098	quercetin	G1/S-specific cyclin-D1	CCND1
MOL000098	quercetin	Apoptosis regulator Bcl-2	BCL2
MOL000098	quercetin	Bcl-2-like protein 1	BCL2L1
MOL000098	quercetin	Proto-oncogene c-Fos	FOS
MOL000098	quercetin	Cyclin-dependent kinase inhibitor 1	CDK1
MOL000098	quercetin	Eukaryotic translation initiation factor 6	EIF6
MOL000098	quercetin	Apoptosis regulator BAX	BAX
MOL000098	quercetin	Caspase-9	CASP9
MOL000098	quercetin	Urokinase-type plasminogen activator	PLAU
MOL000098	quercetin	72 kDa type IV collagenase	MMP2
MOL000098	quercetin	Matrix metalloproteinase-9	MMP9
MOL000098	quercetin	Mitogen-activated protein kinase 1	MAPK1
MOL000098	quercetin	Interleukin-10	IL10
MOL000098	quercetin	Pro-epidermal growth factor	EGF
MOL000098	quercetin	Retinoblastoma-associated protein	RB1
MOL000098	quercetin	Tumor necrosis factor	TNF
MOL000098	quercetin	Transcription factor AP-1	JUN
MOL000098	quercetin	Interleukin-6	IL6
MOL000098	quercetin	Cyclin-dependent kinase inhibitor 2A, isoforms 1/2/3	#N/A
MOL000098	quercetin	Activator of 90 kDa heat shock protein ATPase homolog 1	AHSA1
MOL000098	quercetin	Caspase-3	CASP3
MOL000098	quercetin	Cellular tumor antigen p53	TP53
MOL000098	quercetin	ETS domain-containing protein Elk-1	ELK1
MOL000098	quercetin	NF-kappa-B inhibitor alpha	NFKBIA
MOL000098	quercetin	NADPH--cytochrome P450 reductase	POR
MOL000098	quercetin	Ornithine decarboxylase	ODC1
MOL000098	quercetin	Xanthine dehydrogenase/oxidase	XDH
MOL000098	quercetin	Caspase-8	CASP8
MOL000098	quercetin	DNA topoisomerase 1	TOP1
MOL000098	quercetin	RAF proto-oncogene serine/threonine-protein kinase	RAF1
MOL000098	quercetin	Superoxide dismutase [Cu-Zn]	SOD1
MOL000098	quercetin	Protein kinase C alpha type	PRKCA
MOL000098	quercetin	Interstitial collagenase	MMP1
MOL000098	quercetin	Hypoxia-inducible factor 1-alpha	HIF1AN
MOL000098	quercetin	Signal transducer and activator of transcription 1-alpha/beta	STAT1
MOL000098	quercetin	Protein CBFA2T1	RUNX1T1
MOL000098	quercetin	Probable E3 ubiquitin-protein ligase HERC5	#N/A
MOL000098	quercetin	Cell division control protein 2 homolog	#N/A
MOL000098	quercetin	78 kDa glucose-regulated protein	HSPA5
MOL000098	quercetin	Receptor tyrosine-protein kinase erbB-2	ERBB2
MOL000098	quercetin	Peroxisome proliferator-activated receptor gamma	PPARG
MOL000098	quercetin	Acetyl-CoA carboxylase 1	ACACA
MOL000098	quercetin	Heme oxygenase 1	HMOX1
MOL000098	quercetin	Cytochrome P450 3A4	CYP3A4
MOL000098	quercetin	Cytochrome P450 1A2	CYP1A2
MOL000098	quercetin	Caveolin-1	CAV1 CAV
MOL000098	quercetin	Myc proto-oncogene protein	MYC
MOL000098	quercetin	Tissue factor	F3
MOL000098	quercetin	Gap junction alpha-1 protein	GJA1
MOL000098	quercetin	Cytochrome P450 1A1	CYP1A1
MOL000098	quercetin	Intercellular adhesion molecule 1	ICAM1
MOL000098	quercetin	Interleukin-1 beta	IL1B
MOL000098	quercetin	C-C motif chemokine 2	CCL2
MOL000098	quercetin	E-selectin	SELE
MOL000098	quercetin	Vascular cell adhesion protein 1	VCAM1
MOL000098	quercetin	Prostaglandin E2 receptor EP3 subtype	PTGER3
MOL000098	quercetin	Interleukin-8	CXCL8
MOL000098	quercetin	Protein kinase C beta type	PRKCB
MOL000098	quercetin	Baculoviral IAP repeat-containing protein 5	BIRC5
MOL000098	quercetin	Dual oxidase 2	DUOX2
MOL000098	quercetin	Nitric oxide synthase, endothelial	NOS3
MOL000098	quercetin	Heat shock protein beta-1	HSPB1
MOL000098	quercetin	Transforming growth factor beta-1	TGFB1
MOL000098	quercetin	Estrogen sulfotransferase	#N/A
MOL000098	quercetin	Maltase-glucoamylase, intestinal	MGAM
MOL000098	quercetin	Interleukin-2	IL2
MOL000098	quercetin	Nuclear receptor subfamily 1 group I member 2	NR1I2
MOL000098	quercetin	Cytochrome P450 1B1	CYP1B1
MOL000098	quercetin	G2/mitotic-specific cyclin-B1	CCNB1 CCNB
MOL000098	quercetin	Tissue-type plasminogen activator	PLAT
MOL000098	quercetin	Thrombomodulin	0
MOL000098	quercetin	Plasminogen activator inhibitor 1	SERPINE1
MOL000098	quercetin	Collagen alpha-1(I) chain	COL1A1
MOL000098	quercetin	Interferon gamma	IFNG
MOL000098	quercetin	Arachidonate 5-lipoxygenase	ALOX5AP
MOL000098	quercetin	Phosphatidylinositol-3,4,5-trisphosphate 3-phosphatase and dual-specificity protein phosphatase PTEN	PTEN
MOL000098	quercetin	Interleukin-1 alpha	IL1A
MOL000098	quercetin	Myeloperoxidase	MPO
MOL000098	quercetin	DNA topoisomerase 2-alpha	TOP2A
MOL000098	quercetin	Neutrophil cytosol factor 1	NCF1
MOL000098	quercetin	ATP-binding cassette sub-family G member 2	ABCA2
MOL000098	quercetin	Hyaluronan synthase 2	HAS2
MOL000098	quercetin	Glutathione S-transferase P	GSTP1
MOL000098	quercetin	Nuclear factor erythroid 2-related factor 2	NFE2L2
MOL000098	quercetin	NAD(P)H dehydrogenase [quinone] 1	NQO1
MOL000098	quercetin	Poly [ADP-ribose] polymerase 1	PARP1
MOL000098	quercetin	Aryl hydrocarbon receptor	AHR
MOL000098	quercetin	26S proteasome non-ATPase regulatory subunit 3	PSMD3
MOL000098	quercetin	Solute carrier family 2, facilitated glucose transporter member 4	SLC2A4
MOL000098	quercetin	Collagen alpha-1(III) chain	COL3A1
MOL000098	quercetin	DNA gyrase subunit B	#N/A
MOL000098	quercetin	C-X-C motif chemokine 11	CXCL11
MOL000098	quercetin	C-X-C motif chemokine 2	CXCL2
MOL000098	quercetin	DDB1- and CUL4-associated factor 5	DCAF5
MOL000098	quercetin	Nuclear receptor subfamily 1 group I member 3	NR1I3
MOL000098	quercetin	Serine/threonine-protein kinase Chk2	CHEK2
MOL000098	quercetin	Insulin receptor	INSR
MOL000098	quercetin	Claudin-4	CLDN4
MOL000098	quercetin	Peroxisome proliferator-activated receptor alpha	PPARA
MOL000098	quercetin	Peroxisome proliferator-activated receptor delta	PPARD
MOL000098	quercetin	Heat shock factor protein 1	HSF1
MOL000098	quercetin	C-reactive protein	CRP
MOL000098	quercetin	C-X-C motif chemokine 10	CXCL10
MOL000098	quercetin	Inhibitor of nuclear factor kappa-B kinase subunit alpha	CHUK
MOL000098	quercetin	Osteopontin	SPP1
MOL000098	quercetin	Runt-related transcription factor 2	RUNX2
MOL000098	quercetin	Ras association domain-containing protein 1	RASSF1 RDA32
MOL000098	quercetin	Transcription factor E2F1	E2F1
MOL000098	quercetin	Transcription factor E2F2	E2F2
MOL000098	quercetin	Prostatic acid phosphatase	ACP3
MOL000098	quercetin	Cathepsin D	CTSD
MOL000098	quercetin	Insulin-like growth factor-binding protein 3	IGFBP3
MOL000098	quercetin	Insulin-like growth factor II	IGF2
MOL000098	quercetin	CD40 ligand	D40LG
MOL000098	quercetin	Interferon regulatory factor 1	IRF1
MOL000098	quercetin	Receptor tyrosine-protein kinase erbB-3	ERBB3
MOL000098	quercetin	Serum paraoxonase/arylesterase 1	PON1
MOL000098	quercetin	Type I iodothyronine deiodinase	DIO1
MOL000098	quercetin	Procollagen C-endopeptidase enhancer 1	PCOLCE
MOL000098	quercetin	Puromycin-sensitive aminopeptidase	NPEPPS
MOL000098	quercetin	Hexokinase-2	HK2
MOL000098	quercetin	Homeobox protein Nkx-3.1	NKX3-1
MOL000098	quercetin	Ras GTPase-activating protein 1	RASA1
MOL000098	quercetin	Peroxidase C1A	#N/A
MOL000098	quercetin	Glutathione S-transferase Mu 1	GSTM1
MOL000098	quercetin	Glutathione S-transferase Mu 2	GSTM2
MOL000417	Calycosin	Nitric oxide synthase, inducible	NOS2
MOL000417	Calycosin	Prostaglandin G/H synthase 1	PTGS1
MOL000417	Calycosin	Estrogen receptor	ESR1
MOL000417	Calycosin	Androgen receptor	AR
MOL000417	Calycosin	Peroxisome proliferator activated receptor gamma	PPARG
MOL000417	Calycosin	Prostaglandin G/H synthase 2	PTGS2
MOL000417	Calycosin	Retinoic acid receptor RXR-alpha	RXRA
MOL000417	Calycosin	CGMP-inhibited 3',5'-cyclic phosphodiesterase A	PDE3A
MOL000417	Calycosin	Estrogen receptor beta	ESR2
MOL000417	Calycosin	Dipeptidyl peptidase IV	DPP4
MOL000417	Calycosin	Mitogen-activated protein kinase 14	MAPK14
MOL000417	Calycosin	Glycogen synthase kinase-3 beta	GSK3B
MOL000417	Calycosin	Heat shock protein HSP 90	#N/A
MOL000417	Calycosin	Cell division protein kinase 2	#N/A
MOL000417	Calycosin	Serine/threonine-protein kinase Chk1	CHEK1
MOL000417	Calycosin	mRNA of PKA Catalytic Subunit C-alpha	#N/A
MOL000417	Calycosin	Trypsin-1	PRSS1
MOL000417	Calycosin	Proto-oncogene serine/threonine-protein kinase Pim-1	#N/A
MOL000417	Calycosin	Cyclin-A2	CCNA2
MOL000417	Calycosin	Nuclear receptor coactivator 2	NCOA2
MOL000417	Calycosin	Calmodulin	CALM1
MOL000417	Calycosin	Beta-2 adrenergic receptor	ADRB2
MOL000439	isomucronulatol-7,2'-di-O-glucosiole	DNA topoisomerase II	TOP2
MOL000354	isorhamnetin	Nitric oxide synthase, inducible	NOS2
MOL000354	isorhamnetin	Prostaglandin G/H synthase 1	PTGS1
MOL000354	isorhamnetin	Estrogen receptor	ESR1
MOL000354	isorhamnetin	Androgen receptor	AR
MOL000354	isorhamnetin	Peroxisome proliferator activated receptor gamma	PPARG
MOL000354	isorhamnetin	Prostaglandin G/H synthase 2	PTGS2
MOL000354	isorhamnetin	mRNA of Protein-tyrosine phosphatase, non-receptor type 1	#N/A
MOL000354	isorhamnetin	Estrogen receptor beta	ESR2
MOL000354	isorhamnetin	Dipeptidyl peptidase IV	DPP4
MOL000354	isorhamnetin	Mitogen-activated protein kinase 14	MAPK14
MOL000354	isorhamnetin	Glycogen synthase kinase-3 beta	GSK3B
MOL000354	isorhamnetin	Heat shock protein HSP 90	#N/A
MOL000354	isorhamnetin	Cell division protein kinase 2	#N/A
MOL000354	isorhamnetin	Phosphatidylinositol-4,5-bisphosphate 3-kinase catalytic subunit, gamma isoform	PIK3CG
MOL000354	isorhamnetin	mRNA of PKA Catalytic Subunit C-alpha	#N/A
MOL000354	isorhamnetin	Trypsin-1	PRSS1
MOL000354	isorhamnetin	Proto-oncogene serine/threonine-protein kinase Pim-1	#N/A
MOL000354	isorhamnetin	Cyclin-A2	CCNA2
MOL000354	isorhamnetin	Nuclear receptor coactivator 2	NCOA2
MOL000354	isorhamnetin	Calmodulin	CALM1
MOL000354	isorhamnetin	Glycogen phosphorylase, muscle form	PYGM
MOL000354	isorhamnetin	Peroxisome proliferator activated receptor delta	PPARD
MOL000354	isorhamnetin	Serine/threonine-protein kinase Chk1	CHEK1
MOL000354	isorhamnetin	Aldose reductase	#N/A
MOL000354	isorhamnetin	Nuclear receptor coactivator 1	NCOA1
MOL000354	isorhamnetin	Coagulation factor VII	F7
MOL000354	isorhamnetin	Thrombin	#N/A
MOL000354	isorhamnetin	Nitric-oxide synthase, endothelial	NOS3
MOL000354	isorhamnetin	Acetylcholinesterase	ACHE
MOL000354	isorhamnetin	Gamma-aminobutyric acid receptor subunit alpha-1	GABRA1
MOL000354	isorhamnetin	Amine oxidase [flavin-containing] B	MAOB
MOL000354	isorhamnetin	Glutamate receptor 2	GRIA2
MOL000354	isorhamnetin	Cytochrome P450-cam	#N/A
MOL000354	isorhamnetin	Transcription factor p65	RELA
MOL000354	isorhamnetin	Xanthine dehydrogenase/oxidase	XDH
MOL000354	isorhamnetin	Neutrophil cytosol factor 1	NCF1
MOL000354	isorhamnetin	Oxidized low-density lipoprotein receptor 1	OLR1
MOL000239	Jaranol	Nitric oxide synthase, inducible	NOS2
MOL000239	Jaranol	Prostaglandin G/H synthase 1	PTGS1
MOL000239	Jaranol	Androgen receptor	AR
MOL000239	Jaranol	Sodium channel protein type 5 subunit alpha	SCN5A
MOL000239	Jaranol	Prostaglandin G/H synthase 2	PTGS2
MOL000239	Jaranol	Estrogen receptor beta	ESR2
MOL000239	Jaranol	Dipeptidyl peptidase IV	DPP4
MOL000239	Jaranol	Heat shock protein HSP 90	#N/A
MOL000239	Jaranol	Cell division protein kinase 2	#N/A
MOL000239	Jaranol	Serine/threonine-protein kinase Chk1	CHEK1
MOL000239	Jaranol	Trypsin-1	PRSS1
MOL000239	Jaranol	Nuclear receptor coactivator 2	NCOA2
MOL000239	Jaranol	Calmodulin	CALM1
MOL000371	3,9-di-O-methylnissolin	Nitric oxide synthase, inducible	NOS2
MOL000371	3,9-di-O-methylnissolin	Prostaglandin G/H synthase 1	PTGS1
MOL000371	3,9-di-O-methylnissolin	Muscarinic acetylcholine receptor M3	CHRM3
MOL000371	3,9-di-O-methylnissolin	Thrombin	#N/A
MOL000371	3,9-di-O-methylnissolin	Muscarinic acetylcholine receptor M1	CHRM1
MOL000371	3,9-di-O-methylnissolin	Estrogen receptor	ESR1
MOL000371	3,9-di-O-methylnissolin	Beta-1 adrenergic receptor	ADRB1
MOL000371	3,9-di-O-methylnissolin	Sodium channel protein type 5 subunit alpha	SCN5A
MOL000371	3,9-di-O-methylnissolin	Prostaglandin G/H synthase 2	PTGS2
MOL000371	3,9-di-O-methylnissolin	Nitric-oxide synthase, endothelial	NOS3
MOL000371	3,9-di-O-methylnissolin	5-hydroxytryptamine receptor 3A	HTR3A
MOL000371	3,9-di-O-methylnissolin	Alpha-2C adrenergic receptor	ADRA2C
MOL000371	3,9-di-O-methylnissolin	Retinoic acid receptor RXR-alpha	RXRA
MOL000371	3,9-di-O-methylnissolin	Acetylcholinesterase	ACHE
MOL000371	3,9-di-O-methylnissolin	CGMP-inhibited 3',5'-cyclic phosphodiesterase A	PDE3A
MOL000371	3,9-di-O-methylnissolin	Alpha-1B adrenergic receptor	ADRA1B
MOL000371	3,9-di-O-methylnissolin	Beta-2 adrenergic receptor	ADRB2
MOL000371	3,9-di-O-methylnissolin	Alpha-1D adrenergic receptor	ADRA1D
MOL000371	3,9-di-O-methylnissolin	Mu-type opioid receptor	OPRM1
MOL000371	3,9-di-O-methylnissolin	Gamma-aminobutyric acid receptor subunit alpha-1	GABRA1
MOL000371	3,9-di-O-methylnissolin	Trypsin-1	PRSS1
MOL000371	3,9-di-O-methylnissolin	Nuclear receptor coactivator 2	NCOA2
MOL000371	3,9-di-O-methylnissolin	Calmodulin	CALM1
MOL000211	Mairin	Progesterone receptor	PGR
MOL000380	(6aR,11aR)-9,10-dimethoxy-6a,11a-dihydro-6H-benzofurano[3,2-c]chromen-3-ol	Nitric oxide synthase, inducible	NOS2
MOL000380	(6aR,11aR)-9,10-dimethoxy-6a,11a-dihydro-6H-benzofurano[3,2-c]chromen-3-ol	Prostaglandin G/H synthase 1	PTGS1
MOL000380	(6aR,11aR)-9,10-dimethoxy-6a,11a-dihydro-6H-benzofurano[3,2-c]chromen-3-ol	Muscarinic acetylcholine receptor M3	CHRM3
MOL000380	(6aR,11aR)-9,10-dimethoxy-6a,11a-dihydro-6H-benzofurano[3,2-c]chromen-3-ol	Thrombin	#N/A
MOL000380	(6aR,11aR)-9,10-dimethoxy-6a,11a-dihydro-6H-benzofurano[3,2-c]chromen-3-ol	Muscarinic acetylcholine receptor M1	CHRM1
MOL000380	(6aR,11aR)-9,10-dimethoxy-6a,11a-dihydro-6H-benzofurano[3,2-c]chromen-3-ol	Estrogen receptor	ESR1
MOL000380	(6aR,11aR)-9,10-dimethoxy-6a,11a-dihydro-6H-benzofurano[3,2-c]chromen-3-ol	Sodium channel protein type 5 subunit alpha	SCN5A
MOL000380	(6aR,11aR)-9,10-dimethoxy-6a,11a-dihydro-6H-benzofurano[3,2-c]chromen-3-ol	Prostaglandin G/H synthase 2	PTGS2
MOL000380	(6aR,11aR)-9,10-dimethoxy-6a,11a-dihydro-6H-benzofurano[3,2-c]chromen-3-ol	5-hydroxytryptamine receptor 3A	HTR3A
MOL000380	(6aR,11aR)-9,10-dimethoxy-6a,11a-dihydro-6H-benzofurano[3,2-c]chromen-3-ol	Retinoic acid receptor RXR-alpha	RXRA
MOL000380	(6aR,11aR)-9,10-dimethoxy-6a,11a-dihydro-6H-benzofurano[3,2-c]chromen-3-ol	Acetylcholinesterase	ACHE
MOL000380	(6aR,11aR)-9,10-dimethoxy-6a,11a-dihydro-6H-benzofurano[3,2-c]chromen-3-ol	Alpha-1B adrenergic receptor	ADRA1B
MOL000380	(6aR,11aR)-9,10-dimethoxy-6a,11a-dihydro-6H-benzofurano[3,2-c]chromen-3-ol	Beta-2 adrenergic receptor	ADRB2
MOL000380	(6aR,11aR)-9,10-dimethoxy-6a,11a-dihydro-6H-benzofurano[3,2-c]chromen-3-ol	Alpha-1D adrenergic receptor	ADRA1D
MOL000380	(6aR,11aR)-9,10-dimethoxy-6a,11a-dihydro-6H-benzofurano[3,2-c]chromen-3-ol	Gamma-aminobutyric acid receptor subunit alpha-1	GABRA1
MOL000380	(6aR,11aR)-9,10-dimethoxy-6a,11a-dihydro-6H-benzofurano[3,2-c]chromen-3-ol	Heat shock protein HSP 90	#N/A
MOL000380	(6aR,11aR)-9,10-dimethoxy-6a,11a-dihydro-6H-benzofurano[3,2-c]chromen-3-ol	Neuronal acetylcholine receptor protein, alpha-7 chain	CHRNA7
MOL000380	(6aR,11aR)-9,10-dimethoxy-6a,11a-dihydro-6H-benzofurano[3,2-c]chromen-3-ol	Trypsin-1	PRSS1
MOL000380	(6aR,11aR)-9,10-dimethoxy-6a,11a-dihydro-6H-benzofurano[3,2-c]chromen-3-ol	Nuclear receptor coactivator 2	NCOA2
MOL000380	(6aR,11aR)-9,10-dimethoxy-6a,11a-dihydro-6H-benzofurano[3,2-c]chromen-3-ol	Nuclear receptor coactivator 1	NCOA1
MOL000380	(6aR,11aR)-9,10-dimethoxy-6a,11a-dihydro-6H-benzofurano[3,2-c]chromen-3-ol	Calmodulin	CALM1
MOL000380	(6aR,11aR)-9,10-dimethoxy-6a,11a-dihydro-6H-benzofurano[3,2-c]chromen-3-ol	Muscarinic acetylcholine receptor M4	CHRM4
MOL000433	FA	Cell division protein kinase 2	#N/A
MOL000433	FA	Thrombin	#N/A
MOL000433	FA	Glycogen synthase kinase-3 beta	GSK3B
MOL000392	formononetin	Nitric oxide synthase, inducible	NOS2
MOL000392	formononetin	Prostaglandin G/H synthase 1	PTGS1
MOL000392	formononetin	Muscarinic acetylcholine receptor M1	CHRM1
MOL000392	formononetin	Estrogen receptor	ESR1
MOL000392	formononetin	Androgen receptor	AR
MOL000392	formononetin	Peroxisome proliferator activated receptor gamma	PPARG
MOL000392	formononetin	Prostaglandin G/H synthase 2	PTGS2
MOL000392	formononetin	Retinoic acid receptor RXR-alpha	RXRA
MOL000392	formononetin	CGMP-inhibited 3',5'-cyclic phosphodiesterase A	PDE3A
MOL000392	formononetin	Alpha-1A adrenergic receptor	ADRA1A
MOL000392	formononetin	Sodium-dependent dopamine transporter	SLC6A3
MOL000392	formononetin	Beta-2 adrenergic receptor	ADRB2
MOL000392	formononetin	Sodium-dependent serotonin transporter	SLC6A4
MOL000392	formononetin	Estrogen receptor beta	ESR2
MOL000392	formononetin	Dipeptidyl peptidase IV	DPP4
MOL000392	formononetin	Mitogen-activated protein kinase 14	MAPK14
MOL000392	formononetin	Glycogen synthase kinase-3 beta	GSK3B
MOL000392	formononetin	Heat shock protein HSP 90	#N/A
MOL000392	formononetin	Cell division protein kinase 2	#N/A
MOL000392	formononetin	Amine oxidase [flavin-containing] B	MAOB
MOL000392	formononetin	Serine/threonine-protein kinase Chk1	CHEK1
MOL000392	formononetin	mRNA of PKA Catalytic Subunit C-alpha	#N/A
MOL000392	formononetin	Trypsin-1	PRSS1
MOL000392	formononetin	Proto-oncogene serine/threonine-protein kinase Pim-1	#N/A
MOL000392	formononetin	Cyclin-A2	CCNA2
MOL000392	formononetin	Calmodulin	CALM1
MOL000392	formononetin	cAMP-dependent protein kinase inhibitor alpha	PKIA
MOL000392	formononetin	Thrombin	#N/A
MOL000392	formononetin	Nitric-oxide synthase, endothelial	NOS3
MOL000392	formononetin	Acetylcholinesterase	ACHE
MOL000392	formononetin	Beta-lactamase	#N/A
MOL000392	formononetin	Transcription factor AP-1	JUN
MOL000392	formononetin	Peroxisome proliferator-activated receptor gamma	PPARG
MOL000392	formononetin	Interleukin-4	IL4
MOL000392	formononetin	NAD-dependent deacetylase sirtuin-1	SIRT1
MOL000392	formononetin	ATP synthase subunit beta, mitochondrial	ATP5F1B
MOL000392	formononetin	NADH-ubiquinone oxidoreductase chain 6	MT-ND6
MOL000392	formononetin	3 beta-hydroxysteroid dehydrogenase/Delta 5-->4-isomerase type 2	HSD3B2
MOL000392	formononetin	3 beta-hydroxysteroid dehydrogenase/Delta 5-->4-isomerase type 1	HSD3B1
MOL000378	7-O-methylisomucronulatol	Nitric oxide synthase, inducible	NOS2
MOL000378	7-O-methylisomucronulatol	Prostaglandin G/H synthase 1	PTGS1
MOL000378	7-O-methylisomucronulatol	Dopamine D1 receptor	#N/A
MOL000378	7-O-methylisomucronulatol	Muscarinic acetylcholine receptor M3	CHRM3
MOL000378	7-O-methylisomucronulatol	Thrombin	#N/A
MOL000378	7-O-methylisomucronulatol	Potassium voltage-gated channel subfamily H member 2	KCNH2
MOL000378	7-O-methylisomucronulatol	Muscarinic acetylcholine receptor M1	CHRM1
MOL000378	7-O-methylisomucronulatol	Estrogen receptor	ESR1
MOL000378	7-O-methylisomucronulatol	Androgen receptor	AR
MOL000378	7-O-methylisomucronulatol	Beta-1 adrenergic receptor	ADRB1
MOL000378	7-O-methylisomucronulatol	Sodium channel protein type 5 subunit alpha	SCN5A
MOL000378	7-O-methylisomucronulatol	Peroxisome proliferator activated receptor gamma	PPARG
MOL000378	7-O-methylisomucronulatol	Coagulation factor Xa	F10
MOL000378	7-O-methylisomucronulatol	Muscarinic acetylcholine receptor M5	CHRM5
MOL000378	7-O-methylisomucronulatol	Prostaglandin G/H synthase 2	PTGS2
MOL000378	7-O-methylisomucronulatol	Nitric-oxide synthase, endothelial	NOS3
MOL000378	7-O-methylisomucronulatol	Alpha-2C adrenergic receptor	ADRA2C
MOL000378	7-O-methylisomucronulatol	Muscarinic acetylcholine receptor M4	CHRM4
MOL000378	7-O-methylisomucronulatol	Retinoic acid receptor RXR-alpha	RXRA
MOL000378	7-O-methylisomucronulatol	Delta-type opioid receptor	OPRD1
MOL000378	7-O-methylisomucronulatol	CGMP-inhibited 3',5'-cyclic phosphodiesterase A	PDE3A
MOL000378	7-O-methylisomucronulatol	5-hydroxytryptamine 2A receptor	HTR2A
MOL000378	7-O-methylisomucronulatol	Alpha-1A adrenergic receptor	ADRA1A
MOL000378	7-O-methylisomucronulatol	Muscarinic acetylcholine receptor M2	CHRM2
MOL000378	7-O-methylisomucronulatol	Alpha-1B adrenergic receptor	ADRA1B
MOL000378	7-O-methylisomucronulatol	Sodium-dependent dopamine transporter	SLC6A3
MOL000378	7-O-methylisomucronulatol	Beta-2 adrenergic receptor	ADRB2
MOL000378	7-O-methylisomucronulatol	Alpha-1D adrenergic receptor	ADRA1D
MOL000378	7-O-methylisomucronulatol	Sodium-dependent serotonin transporter	SLC6A4
MOL000378	7-O-methylisomucronulatol	Estrogen receptor beta	ESR2
MOL000378	7-O-methylisomucronulatol	Gamma-aminobutyric acid receptor subunit alpha-1	GABRA1
MOL000378	7-O-methylisomucronulatol	Dipeptidyl peptidase IV	DPP4
MOL000378	7-O-methylisomucronulatol	Mitogen-activated protein kinase 14	MAPK14
MOL000378	7-O-methylisomucronulatol	Glycogen synthase kinase-3 beta	GSK3B
MOL000378	7-O-methylisomucronulatol	Heat shock protein HSP 90	#N/A
MOL000378	7-O-methylisomucronulatol	Cell division protein kinase 2	#N/A
MOL000378	7-O-methylisomucronulatol	Serine/threonine-protein kinase Chk1	CHEK1
MOL000378	7-O-methylisomucronulatol	mRNA of PKA Catalytic Subunit C-alpha	#N/A
MOL000378	7-O-methylisomucronulatol	Retinoic acid receptor RXR-beta	RXRB
MOL000378	7-O-methylisomucronulatol	Trypsin-1	PRSS1
MOL000378	7-O-methylisomucronulatol	Proto-oncogene serine/threonine-protein kinase Pim-1	#N/A
MOL000378	7-O-methylisomucronulatol	Cyclin-A2	CCNA2
MOL000378	7-O-methylisomucronulatol	Nuclear receptor coactivator 2	NCOA2
MOL000378	7-O-methylisomucronulatol	Calcium-activated potassium channel subunit alpha 1	KCNMA1
MOL000378	7-O-methylisomucronulatol	Calmodulin	CALM1

## Sheet: gui zhi
Mol ID	Molecule name	Target name	gene
MOL000073	ent-Epicatechin	Prostaglandin G/H synthase 1	PTGS1
MOL000073	ent-Epicatechin	Estrogen receptor	ESR1
MOL000073	ent-Epicatechin	Prostaglandin G/H synthase 2	PTGS2
MOL000073	ent-Epicatechin	Heat shock protein HSP 90	#N/A
MOL000073	ent-Epicatechin	Beta-lactamase	blaC
MOL000073	ent-Epicatechin	mRNA of PKA Catalytic Subunit C-alpha	#N/A
MOL000492	(+)-catechin	Prostaglandin G/H synthase 1	PTGS1
MOL000492	(+)-catechin	Estrogen receptor	ESR1
MOL000492	(+)-catechin	Prostaglandin G/H synthase 2	PTGS2
MOL000492	(+)-catechin	Heat shock protein HSP 90	#N/A
MOL000492	(+)-catechin	Beta-lactamase	blaC
MOL000492	(+)-catechin	mRNA of PKA Catalytic Subunit C-alpha	#N/A
MOL000492	(+)-catechin	Nuclear receptor coactivator 2	NCOA2
MOL000492	(+)-catechin	Calmodulin	CALM1
MOL000492	(+)-catechin	Retinoic acid receptor RXR-alpha	RXRA
MOL000492	(+)-catechin	Catalase	CAT
MOL000492	(+)-catechin	Hyaluronan synthase 2	Has2
MOL001736	(-)-taxifolin	Prostaglandin G/H synthase 1	PTGS1
MOL001736	(-)-taxifolin	Prostaglandin G/H synthase 2	PTGS2
MOL001736	(-)-taxifolin	Heat shock protein HSP 90	#N/A
MOL001736	(-)-taxifolin	Phosphatidylinositol-4,5-bisphosphate 3-kinase catalytic subunit, gamma isoform	PIK3CG
MOL004576	taxifolin	Prostaglandin G/H synthase 1	PTGS1
MOL004576	taxifolin	Prostaglandin G/H synthase 2	PTGS2
MOL004576	taxifolin	Heat shock protein HSP 90	#N/A
MOL004576	taxifolin	Phosphatidylinositol-4,5-bisphosphate 3-kinase catalytic subunit, gamma isoform	PIK3CG
MOL004576	taxifolin	Retinoic acid receptor RXR-alpha	RXRA
MOL004576	taxifolin	Aldose reductase	#N/A
MOL004576	taxifolin	Transcription factor p65	RELA
MOL004576	taxifolin	Metal-binding activator 1	MAC1
MOL004576	taxifolin	Intercellular adhesion molecule 1	ICAM1
MOL004576	taxifolin	Diacylglycerol O-acyltransferase 2	Dgat2
MOL004576	taxifolin	Microsomal triglyceride transfer protein large subunit	MTTP MTP
MOL004576	taxifolin	Apolipoprotein B-100	APOB
MOL000359	sitosterol	Progesterone receptor	PGR
MOL000359	sitosterol	Nuclear receptor coactivator 2	NCOA2
MOL000359	sitosterol	Mineralocorticoid receptor	NR3C2
MOL000358	beta-sitosterol	Progesterone receptor	PGR
MOL000358	beta-sitosterol	Nuclear receptor coactivator 2	NCOA2
MOL000358	beta-sitosterol	Prostaglandin G/H synthase 1	PTGS1
MOL000358	beta-sitosterol	Prostaglandin G/H synthase 2	PTGS2
MOL000358	beta-sitosterol	Heat shock protein HSP 90	#N/A
MOL000358	beta-sitosterol	Phosphatidylinositol-4,5-bisphosphate 3-kinase catalytic subunit, gamma isoform	PIK3CG
MOL000358	beta-sitosterol	Potassium voltage-gated channel subfamily H member 2	KCNH2
MOL000358	beta-sitosterol	mRNA of PKA Catalytic Subunit C-alpha	#N/A
MOL000358	beta-sitosterol	Dopamine D1 receptor	Dop1R1
MOL000358	beta-sitosterol	Muscarinic acetylcholine receptor M3	CHRM3
MOL000358	beta-sitosterol	Muscarinic acetylcholine receptor M1	CHRM1
MOL000358	beta-sitosterol	Sodium channel protein type 5 subunit alpha	SCN5A
MOL000358	beta-sitosterol	Gamma-aminobutyric-acid receptor alpha-2 subunit	Gabra2
MOL000358	beta-sitosterol	Muscarinic acetylcholine receptor M4	CHRM4
MOL000358	beta-sitosterol	CGMP-inhibited 3',5'-cyclic phosphodiesterase A	PDE3A
MOL000358	beta-sitosterol	5-hydroxytryptamine 2A receptor	HTR2A
MOL000358	beta-sitosterol	Gamma-aminobutyric-acid receptor alpha-5 subunit	Gabra5
MOL000358	beta-sitosterol	Alpha-1A adrenergic receptor	ADRA1A
MOL000358	beta-sitosterol	Gamma-aminobutyric-acid receptor alpha-3 subunit	Gabra3
MOL000358	beta-sitosterol	Muscarinic acetylcholine receptor M2	CHRM2
MOL000358	beta-sitosterol	Alpha-1B adrenergic receptor	Adra1b
MOL000358	beta-sitosterol	Beta-2 adrenergic receptor	ADRB2
MOL000358	beta-sitosterol	Neuronal acetylcholine receptor subunit alpha-2	CHRNA2
MOL000358	beta-sitosterol	Sodium-dependent serotonin transporter	SLC6A2
MOL000358	beta-sitosterol	Mu-type opioid receptor	OPRM1
MOL000358	beta-sitosterol	Gamma-aminobutyric acid receptor subunit alpha-1	GABRA1
MOL000358	beta-sitosterol	Neuronal acetylcholine receptor protein, alpha-7 chain	CHRNA7
MOL000358	beta-sitosterol	Cytochrome P450-cam	camC
MOL000358	beta-sitosterol	Apoptosis regulator Bcl-2	BCL2
MOL000358	beta-sitosterol	Apoptosis regulator BAX	BAX
MOL000358	beta-sitosterol	Caspase-9	CASP9
MOL000358	beta-sitosterol	Transcription factor AP-1	JUN
MOL000358	beta-sitosterol	Caspase-3	CASP3
MOL000358	beta-sitosterol	Caspase-8	CASP8
MOL000358	beta-sitosterol	Protein kinase C alpha type	PRKCA
MOL000358	beta-sitosterol	Transforming growth factor beta-1	TGFB1
MOL000358	beta-sitosterol	Serum paraoxonase/arylesterase 1	PON1
MOL000358	beta-sitosterol	Microtubule-associated protein 2	Map2

## Sheet: shui zhi
Molecule name	Target name
Crocetin	RXRB	SLC8A1	GAMT	CKMT1B	RARRES1
	NR0B1	TRPV1	RARG	PPARG	FFAR1
	CKM	RARB	RXRG	FADS2	FADS1
	PPARD	SLC6A8	PTGS1	ACSL4	CKMT2
	PTGS2	CKMT1A	ELOVL4	ALDH1A1	RARA
	CKB	GPRC5A	RXRA	ALDH1A2	ACSL3
	APOA2	ALDH3A1	IL1B	TNF	SLC9A1
	IL13	GATM	SC5D	SLC16A12	LPCAT1
	COL27A1	SERPINB7	ABCC2	NDRG2	NAMPT
	RGCC	IHH	OPN3	HOPX	LARP4B
	ESRRG	FNDC5	SLC8B1	NR1H3	OSBPL8
	IGF1	AVPR1A	MED1	FMR1	ELOVL3
	FASLG	CACNA1A	PLA2R1	ITGB3	METRNL
	ELOVL1	MAPK9	MAP4K4	ANXA13	FOXA1
	NUFIP2	ADRA2A	OPN4	STX3	SOX15
	OXER1	RPL7A	PNPLA2	CAPN3	EIF2AK1
	CYP4F2	PTGIS	CNST	GDF5	SLC8A2
	ALDH8A1	SHBG	SLC8A3	FGF10	ABCF1
	SERPINH1	NPPC	AR	HEG1	PPARGC1B
	ITGAV	GNAT2	MATN1	MYOD1	ELOVL6
	PTPN2	S100A8	ALOX5AP	TCF3	AVP
	PAX2	SP1	SLC6A4	SP3	BDKRB2
	NR1H2	NEUROD2	FGF4	SCD5	INS
	AGTR2	JAK3	GNB2L1	GATA3	ZNF536
	ANAPC2	WNT11	TBC1D32	JUNB	ALOX15B
	CDC20	DNAJA3	RET	KCNA5	COL1A1
	NR1D1	SLC3A2	PAXBP1	MEX3C	NOTCH1
	ELOVL7	PAX7	SCD	ABCA1	NAPRT
	WDR77	MECOM	PLCB1	ABHD5	TSPO
	GJD4	SNCA	ADIPOQ	RYR2	NODAL
	CPLX2	PPARA	MYL2	ALOX15	ANXA1
	SLC35G1	NOS1	TRPM8	PAWR	SOX9
	DHRS9	S100A9	VDR	FABP3	CYP1A1
	FGF2	ABCG1	PRDM16	CYR61	CCM2L
	TRPA1

## Sheet: di long
Molecule name	Target name
Xanthine	ADRA1D	ESRRG	ESR2	ADRA2A	ESR1
	APLP1	ADRA1B	ADRA2C	ADRA2B	PHKG2
	TOX3	CHRNA7	INS	CALCA	TFAP2C
	GSK3A	NAV2	TGFB1	ADRB2	MED1
	TRPV1	NKX3-1	CETN2	NR0B1	CETN1
	ADRB1	SHH	LEF1	ADRBK1	ARRB2
	PPARGC1B	UCHL1	PDE4D	FGFR2	PGR
	DRD5	WNT4	ARRB1	NCOA3	AREG
	ADORA1	ATP2B4	ARRDC3	GPER1	WNT5A
	TRPM8	ADAM17	ADRB3	NOS1	RGS2
	TRIM24	SOX9	VDR	TPM1	EDN2
	GAMT	TRPA1
Guanidine	KC+J16:N34NA3	DLG4	RNASE1	ALDH2	KCND1
	KCNA1	PRKAB1	ADH1A	KCNA10	KCNC3
	ADH1B	KCNA2	TPO	CAT	KCNB1
	KCNA5	KCNC2	KCNC1	ADH1C	KCNB2
	KCND3	KCND2	KCNA4	KCNA7	KCNA6
	KCNQ1	GUCY1B3	GATM	KCNK4	IYD
	CYGB	FBP1	DGKI	ADH7	NFIB
	IGF1	NRXN3	LRRC4B	AQP8	ARX
	EDN1	SHANK3	ACY3	ASPA	NRXN1
	CNTNAP4	OXT	MAGI2	APOE	SOX15
	GRIN2A	RNASE4	RAB3A	MC4R	IL1B
	SPARC	SLC17A7	CYP11A1	SCN5A	SCN10A
	CRLF1	SORCS3	RNASE8	KCNIP2	GPX7
	ALDH1B1	FADD	SNTG2	SCGB1A1	OXTR
	DARS	LEP	NLGN1	CACNA1D	RAPGEF2
	MIP	ANK3	KCNE5	PPARD	NKX2-1
	STX1A	RYR3	ZPR1	ALDH3B1	NPPA
	NRXN2	PAXBP1	PAX7	ALDH3B2	RNASE2
	DAB2IP	ADORA1	ADH4	GJA5	FAS
	POLA1	CYP2E1	ACY1
Xanthinin	PRKCA	AR	CYP19A1	NR3C2	WNT4
	COL5A1	PRKCD	CACNA1I	CACNA1G	TNFSF11
	ESR1	NOX1	PHB	MED1	NKX3-1
	C5	NEDD4	SHBG	SERPINB3	FOXP3
	UBR5	SRC	STAP1	TGFB2	MMP28
	IL4	IL10	NR1I3	TNFAIP3	ALDH1A1
	PDGFB	TSPO	CX3CR1	CD34	S100A9
	RDH11	VDR
4-Guanidino-1-Butanol	RDH5	RBP3	RETSAT	RDH13	DHRS3
	ALDH1A1	ALDH1A3	RDH12	DHRS4	RBP1
	ALDH1A2	RLBP1	RDH14	RDH8	LRAT
	OPN4	ALDH3A1	RHO	RS1	CTSH
	HSD17B7	RDH10	ALDH8A1	SHBG	DHRS2
	GATA3	AR	THRA	PAX2	CBR3
	CRYM	ASCL1	DLX5	RET	THRB
	CYP1A1	TSPO	OPN5	DHRS9	CBR1
	ATP1A1

## Sheet: BP
_MEMBER_MyList	_LogP_MyList	GO	_PATTERN_	_RANK_	GiniIndex	Category	CategoryID	Description	PARENT_GO	LogP	Enrichment	Z-score	#TotalGeneInLibrary	#GeneInGO	#GeneInHitList	#GeneInGOAndHitList	%InGO	STDV %InGO	GeneID	Hits	Log(q-value)	EvidenceCutoff	GROUP_ID	FirstInGroupByEnrichment	FirstInGroupByLogP	BestLogPInGroup	BestEnrichmentInGroup	URL
1	-19.4699	GO:0010035	M1	1	0	GO Biological Processes	19	response to inorganic substance	19_GO:0050896 response to stimulus	-19.4699	28.5531	20.8139	30211	513	33	16	48.4848	8.69989	246|301|841|1728|1956|3162|3309|3725|4609|4734|4780|5594|5743|5970|6622|7128	ALOX15|ANXA1|CASP8|NQO1|EGFR|HMOX1|HSPA5|JUN|MYC|NEDD4|NFE2L2|MAPK1|PTGS2|RELA|SNCA|TNFAIP3	-15.2821	0	1	1	1	-19.4699	68.3198
1	-18.3087	GO:0062197	M1	1	0	GO Biological Processes	19	cellular response to chemical stress	19_GO:0050896 response to stimulus	-18.3087	45.951	24.025	30211	259	33	13	39.3939	8.50581	301|1728|1956|3162|3725|4609|4780|5594|5743|5970|6622|7128|7157	ANXA1|NQO1|EGFR|HMOX1|JUN|MYC|NFE2L2|MAPK1|PTGS2|RELA|SNCA|TNFAIP3|TP53	-14.4246	0	1	0	0	-19.4699	68.3198
1	-18.1354	GO:0006979	M1	1	0	GO Biological Processes	19	response to oxidative stress	19_GO:0050896 response to stimulus	-18.1354	35.1145	21.6835	30211	365	33	14	42.4242	8.6034	301|1728|1956|2950|3162|3725|4780|5594|5743|5970|6622|7128|7157|114757	ANXA1|NQO1|EGFR|GSTP1|HMOX1|JUN|NFE2L2|MAPK1|PTGS2|RELA|SNCA|TNFAIP3|TP53|CYGB	-14.4246	0	1	0	0	-19.4699	68.3198
1	-15.4428	GO:0034599	M1	1	0	GO Biological Processes	19	cellular response to oxidative stress	19_GO:0050896 response to stimulus	-15.4428	46.1942	22.1456	30211	218	33	11	33.3333	8.2061	301|1728|1956|3162|3725|4780|5594|5970|6622|7128|7157	ANXA1|NQO1|EGFR|HMOX1|JUN|NFE2L2|MAPK1|RELA|SNCA|TNFAIP3|TP53	-12.0331	0	1	0	0	-19.4699	68.3198
1	-14.8449	GO:0010038	M1	1	0	GO Biological Processes	19	response to metal ion	19_GO:0050896 response to stimulus	-14.8449	31.2986	18.8807	30211	351	33	12	36.3636	8.37393	246|841|1728|1956|3162|3309|3725|4734|4780|5594|5743|6622	ALOX15|CASP8|NQO1|EGFR|HMOX1|HSPA5|JUN|NEDD4|NFE2L2|MAPK1|PTGS2|SNCA	-11.6113	0	1	0	0	-19.4699	68.3198
1	-14.6696	GO:0000302	M1	1	0	GO Biological Processes	19	response to reactive oxygen species	19_GO:0050896 response to stimulus	-14.6696	53.5371	22.7825	30211	171	33	10	30.303	8.00006	301|1728|1956|2950|3162|3725|4780|5594|5970|7128	ANXA1|NQO1|EGFR|GSTP1|HMOX1|JUN|NFE2L2|MAPK1|RELA|TNFAIP3	-11.4818	0	1	0	0	-19.4699	68.3198
1	-14.2059	GO:0071248	M1	1	0	GO Biological Processes	19	cellular response to metal ion	19_GO:0050896 response to stimulus	-14.2059	48.1834	21.5745	30211	190	33	10	30.303	8.00006	246|1728|1956|3162|3309|3725|4780|5594|5743|6622	ALOX15|NQO1|EGFR|HMOX1|HSPA5|JUN|NFE2L2|MAPK1|PTGS2|SNCA	-11.0595	0	1	0	0	-19.4699	68.3198
1	-13.5638	GO:0071241	M1	1	0	GO Biological Processes	19	cellular response to inorganic substance	19_GO:0050896 response to stimulus	-13.5638	41.6129	19.9925	30211	220	33	10	30.303	8.00006	246|1728|1956|3162|3309|3725|4780|5594|5743|6622	ALOX15|NQO1|EGFR|HMOX1|HSPA5|JUN|NFE2L2|MAPK1|PTGS2|SNCA	-10.6359	0	1	0	0	-19.4699	68.3198
1	-12.294	GO:0034614	M1	1	0	GO Biological Processes	19	cellular response to reactive oxygen species	19_GO:0050896 response to stimulus	-12.294	62.5973	22.075	30211	117	33	8	24.2424	7.46009	301|1728|1956|3725|4780|5594|5970|7128	ANXA1|NQO1|EGFR|JUN|NFE2L2|MAPK1|RELA|TNFAIP3	-9.65026	0	1	0	0	-19.4699	68.3198
1	-8.78043	GO:0042542	M1	1	0	GO Biological Processes	19	response to hydrogen peroxide	19_GO:0050896 response to stimulus	-8.78043	51.8199	17.3322	30211	106	33	6	18.1818	6.71408	301|1728|3162|4780|5970|7128	ANXA1|NQO1|HMOX1|NFE2L2|RELA|TNFAIP3	-6.48469	0	1	0	0	-19.4699	68.3198
1	-7.98208	GO:0070301	M1	1	0	GO Biological Processes	19	cellular response to hydrogen peroxide	19_GO:0050896 response to stimulus	-7.98208	68.3198	18.2418	30211	67	33	5	15.1515	6.24156	301|1728|4780|5970|7128	ANXA1|NQO1|NFE2L2|RELA|TNFAIP3	-5.77247	0	1	0	0	-19.4699	68.3198
1	-17.5628	GO:0009410	M1	1	0	GO Biological Processes	19	response to xenobiotic stimulus	19_GO:0050896 response to stimulus	-17.5628	31.9621	20.6399	30211	401	33	14	42.4242	8.6034	1728|2950|3162|3309|3725|4609|4780|5743|5925|6622|7042|7124|7157|7345	NQO1|GSTP1|HMOX1|HSPA5|JUN|MYC|NFE2L2|PTGS2|RB1|SNCA|TGFB2|TNF|TP53|UCHL1	-13.977	0	2	1	1	-17.5628	51.8199
1	-11.0206	GO:0071466	M1	1	0	GO Biological Processes	19	cellular response to xenobiotic stimulus	19_GO:0050896 response to stimulus	-11.0206	43.5945	18.3073	30211	168	33	8	24.2424	7.46009	1728|2950|3309|4609|4780|5925|7157|7345	NQO1|GSTP1|HSPA5|MYC|NFE2L2|RB1|TP53|UCHL1	-8.45606	0	2	0	0	-17.5628	51.8199
1	-4.5719	GO:0002931	M1	1	0	GO Biological Processes	19	response to ischemia	19_GO:0050896 response to stimulus	-4.5719	51.8199	12.245	30211	53	33	3	9.09091	5.00438	1728|7157|7345	NQO1|TP53|UCHL1	-2.92189	0	2	0	0	-17.5628	51.8199
1	-16.3305	GO:2001233	M1	1	0	GO Biological Processes	19	regulation of apoptotic signaling pathway	19_GO:0023052 signaling	-16.3305	32.4286	20.0317	30211	367	33	13	39.3939	8.50581	2932|2950|3162|3315|4609|4780|5728|5743|5925|5970|7124|7128|7157	GSK3B|GSTP1|HMOX1|HSPB1|MYC|NFE2L2|PTEN|PTGS2|RB1|RELA|TNF|TNFAIP3|TP53	-12.8416	0	3	1	1	-16.3305	56.6279
1	-13.4271	GO:2001234	M1	1	0	GO Biological Processes	19	negative regulation of apoptotic signaling pathway	19_GO:0023052 signaling	-13.4271	40.3297	19.6687	30211	227	33	10	30.303	8.00006	2932|2950|3162|3315|4780|5743|5925|5970|7124|7128	GSK3B|GSTP1|HMOX1|HSPB1|NFE2L2|PTGS2|RB1|RELA|TNF|TNFAIP3	-10.579	0	3	0	0	-16.3305	56.6279
1	-11.467	GO:0071216	M1	1	0	GO Biological Processes	19	cellular response to biotic stimulus	19_GO:0050896 response to stimulus	-11.467	34.4743	17.1807	30211	239	33	9	27.2727	7.75275	2932|2950|3309|5594|5970|7040|7124|7128|7157	GSK3B|GSTP1|HSPA5|MAPK1|RELA|TGFB1|TNF|TNFAIP3|TP53	-8.85898	0	3	0	0	-16.3305	56.6279
1	-10.3589	GO:0032496	M1	1	0	GO Biological Processes	19	response to lipopolysaccharide	19_GO:0044419 biological process involved in interspecies interaction between organisms	-10.3589	25.9099	14.7669	30211	318	33	9	27.2727	7.75275	841|2950|5594|5743|5970|6622|7040|7124|7128	CASP8|GSTP1|MAPK1|PTGS2|RELA|SNCA|TGFB1|TNF|TNFAIP3	-7.89531	0	3	0	0	-16.3305	56.6279
1	-10.2903	GO:0031347	M1	1	0	GO Biological Processes	19	regulation of defense response	19_GO:0050896 response to stimulus	-10.2903	15.5406	12.3733	30211	648	33	11	33.3333	8.2061	246|301|841|2950|4780|5743|5925|5970|6622|7124|7128	ALOX15|ANXA1|CASP8|GSTP1|NFE2L2|PTGS2|RB1|RELA|SNCA|TNF|TNFAIP3	-7.85068	0	3	0	0	-16.3305	56.6279
1	-10.1124	GO:0002237	M1	1	0	GO Biological Processes	19	response to molecule of bacterial origin	19_GO:0044419 biological process involved in interspecies interaction between organisms	-10.1124	24.3049	14.2693	30211	339	33	9	27.2727	7.75275	841|2950|5594|5743|5970|6622|7040|7124|7128	CASP8|GSTP1|MAPK1|PTGS2|RELA|SNCA|TGFB1|TNF|TNFAIP3	-7.68798	0	3	0	0	-16.3305	56.6279
1	-9.54569	GO:2001236	M1	1	0	GO Biological Processes	19	regulation of extrinsic apoptotic signaling pathway	19_GO:0023052 signaling	-9.54569	41.8849	16.7655	30211	153	33	7	21.2121	7.11647	2932|2950|3162|5728|5970|7124|7128	GSK3B|GSTP1|HMOX1|PTEN|RELA|TNF|TNFAIP3	-7.18642	0	3	0	0	-16.3305	56.6279
1	-9.5354	GO:0050727	M1	1	0	GO Biological Processes	19	regulation of inflammatory response	19_GO:0050896 response to stimulus	-9.5354	20.9121	13.1559	30211	394	33	9	27.2727	7.75275	246|301|2950|5743|5925|5970|6622|7124|7128	ALOX15|ANXA1|GSTP1|PTGS2|RB1|RELA|SNCA|TNF|TNFAIP3	-7.18642	0	3	0	0	-16.3305	56.6279
1	-9.01455	GO:2001237	M1	1	0	GO Biological Processes	19	negative regulation of extrinsic apoptotic signaling pathway	19_GO:0023052 signaling	-9.01455	56.6279	18.146	30211	97	33	6	18.1818	6.71408	2932|2950|3162|5970|7124|7128	GSK3B|GSTP1|HMOX1|RELA|TNF|TNFAIP3	-6.70753	0	3	0	0	-16.3305	56.6279
1	-8.26508	GO:0032652	M1	1	0	GO Biological Processes	19	regulation of interleukin-1 production	19_GO:0032501 multicellular organismal process	-8.26508	42.5807	15.6502	30211	129	33	6	18.1818	6.71408	301|841|2950|3315|7124|7128	ANXA1|CASP8|GSTP1|HSPB1|TNF|TNFAIP3	-6.02173	0	3	0	0	-16.3305	56.6279
1	-8.0136	GO:0043122	M1	1	0	GO Biological Processes	19	regulation of I-kappaB kinase/NF-kappaB signaling	19_GO:0023052 signaling	-8.0136	25.2299	12.8235	30211	254	33	7	21.2121	7.11647	841|2950|3162|3315|5970|7124|7128	CASP8|GSTP1|HMOX1|HSPB1|RELA|TNF|TNFAIP3	-5.79425	0	3	0	0	-16.3305	56.6279
1	-7.23254	GO:0009617	M1	1	0	GO Biological Processes	19	response to bacterium	19_GO:0044419 biological process involved in interspecies interaction between organisms	-7.23254	11.349	9.33367	30211	726	33	9	27.2727	7.75275	841|2950|5594|5743|5970|6622|7040|7124|7128	CASP8|GSTP1|MAPK1|PTGS2|RELA|SNCA|TGFB1|TNF|TNFAIP3	-5.1553	0	3	0	0	-16.3305	56.6279
1	-7.12776	GO:0071222	M1	1	0	GO Biological Processes	19	cellular response to lipopolysaccharide	19_GO:0044419 biological process involved in interspecies interaction between organisms	-7.12776	27.4645	12.4173	30211	200	33	6	18.1818	6.71408	2950|5594|5970|7040|7124|7128	GSTP1|MAPK1|RELA|TGFB1|TNF|TNFAIP3	-5.07347	0	3	0	0	-16.3305	56.6279
1	-6.97805	GO:0071219	M1	1	0	GO Biological Processes	19	cellular response to molecule of bacterial origin	19_GO:0044419 biological process involved in interspecies interaction between organisms	-6.97805	25.9099	12.0358	30211	212	33	6	18.1818	6.71408	2950|5594|5970|7040|7124|7128	GSTP1|MAPK1|RELA|TGFB1|TNF|TNFAIP3	-4.94849	0	3	0	0	-16.3305	56.6279
1	-6.89364	GO:0032651	M1	1	0	GO Biological Processes	19	regulation of interleukin-1 beta production	19_GO:0032501 multicellular organismal process	-6.89364	41.6129	14.111	30211	110	33	5	15.1515	6.24156	841|2950|3315|7124|7128	CASP8|GSTP1|HSPB1|TNF|TNFAIP3	-4.88478	0	3	0	0	-16.3305	56.6279
1	-6.66884	GO:0071901	M1	1	0	GO Biological Processes	19	negative regulation of protein serine/threonine kinase activity	19_GO:0048519 negative regulation of biological process	-6.66884	37.5199	13.3657	30211	122	33	5	15.1515	6.24156	2950|5728|5925|7128|7345	GSTP1|PTEN|RB1|TNFAIP3|UCHL1	-4.69053	0	3	0	0	-16.3305	56.6279
1	-5.07439	GO:0051090	M1	1	0	GO Biological Processes	19	regulation of DNA-binding transcription factor activity	19_GO:0008152 metabolic process	-5.07439	12.1794	7.91002	30211	451	33	6	18.1818	6.71408	3162|5728|5925|5970|7124|7128	HMOX1|PTEN|RB1|RELA|TNF|TNFAIP3	-3.35343	0	3	0	0	-16.3305	56.6279
1	-4.62237	GO:0043124	M1	1	0	GO Biological Processes	19	negative regulation of I-kappaB kinase/NF-kappaB signaling	19_GO:0023052 signaling	-4.62237	53.852	12.4916	30211	51	33	3	9.09091	5.00438	841|2950|7128	CASP8|GSTP1|TNFAIP3	-2.96087	0	3	0	0	-16.3305	56.6279
1	-4.47662	GO:0010803	M1	1	0	GO Biological Processes	19	regulation of tumor necrosis factor-mediated signaling pathway	19_GO:0023052 signaling	-4.47662	48.1834	11.7907	30211	57	33	3	9.09091	5.00438	841|2950|7128	CASP8|GSTP1|TNFAIP3	-2.84749	0	3	0	0	-16.3305	56.6279
1	-4.02518	GO:0032102	M1	1	0	GO Biological Processes	19	negative regulation of response to external stimulus	19_GO:0048519 negative regulation of biological process	-4.02518	10.72	6.6892	30211	427	33	5	15.1515	6.24156	2950|5728|5925|7124|7128	GSTP1|PTEN|RB1|TNF|TNFAIP3	-2.47082	0	3	0	0	-16.3305	56.6279
1	-3.95731	GO:0002221	M1	1	0	GO Biological Processes	19	pattern recognition receptor signaling pathway	19_GO:0002376 immune system process	-3.95731	32.3112	9.5593	30211	85	33	3	9.09091	5.00438	5970|7124|7128	RELA|TNF|TNFAIP3	-2.4149	0	3	0	0	-16.3305	56.6279
1	-3.78298	GO:0070663	M1	1	0	GO Biological Processes	19	regulation of leukocyte proliferation	19_GO:0050789 regulation of biological process	-3.78298	14.4171	7.10089	30211	254	33	4	12.1212	5.68144	301|2950|5594|7128	ANXA1|GSTP1|MAPK1|TNFAIP3	-2.26632	0	3	0	0	-16.3305	56.6279
1	-3.31882	GO:0030522	M1	1	0	GO Biological Processes	19	intracellular receptor signaling pathway	19_GO:0023052 signaling	-3.31882	19.6175	7.30129	30211	140	33	3	9.09091	5.00438	4734|5970|7128	NEDD4|RELA|TNFAIP3	-1.86818	0	3	0	0	-16.3305	56.6279
1	-3.25054	GO:0002764	M1	1	0	GO Biological Processes	19	immune response-regulating signaling pathway	19_GO:0002376 immune system process	-3.25054	10.4329	5.87814	30211	351	33	4	12.1212	5.68144	5594|5970|7124|7128	MAPK1|RELA|TNF|TNFAIP3	-1.81244	0	3	0	0	-16.3305	56.6279
1	-3.10379	GO:0001959	M1	1	0	GO Biological Processes	19	regulation of cytokine-mediated signaling pathway	19_GO:0023052 signaling	-3.10379	16.5449	6.64115	30211	166	33	3	9.09091	5.00438	841|2950|7128	CASP8|GSTP1|TNFAIP3	-1.67863	0	3	0	0	-16.3305	56.6279
1	-3.01618	GO:0060759	M1	1	0	GO Biological Processes	19	regulation of response to cytokine stimulus	19_GO:0050896 response to stimulus	-3.01618	15.4295	6.38483	30211	178	33	3	9.09091	5.00438	841|2950|7128	CASP8|GSTP1|TNFAIP3	-1.60214	0	3	0	0	-16.3305	56.6279
1	-2.98836	GO:0032680	M1	1	0	GO Biological Processes	19	regulation of tumor necrosis factor production	19_GO:0032501 multicellular organismal process	-2.98836	15.0904	6.30487	30211	182	33	3	9.09091	5.00438	2950|3315|7128	GSTP1|HSPB1|TNFAIP3	-1.57795	0	3	0	0	-16.3305	56.6279
1	-2.98836	GO:0050728	M1	1	0	GO Biological Processes	19	negative regulation of inflammatory response	19_GO:0048519 negative regulation of biological process	-2.98836	15.0904	6.30487	30211	182	33	3	9.09091	5.00438	2950|5925|7128	GSTP1|RB1|TNFAIP3	-1.57795	0	3	0	0	-16.3305	56.6279
1	-2.95446	GO:1903555	M1	1	0	GO Biological Processes	19	regulation of tumor necrosis factor superfamily cytokine production	19_GO:0032501 multicellular organismal process	-2.95446	14.6869	6.2084	30211	187	33	3	9.09091	5.00438	2950|3315|7128	GSTP1|HSPB1|TNFAIP3	-1.5491	0	3	0	0	-16.3305	56.6279
1	-2.50953	GO:0031348	M1	1	0	GO Biological Processes	19	negative regulation of defense response	19_GO:0048519 negative regulation of biological process	-2.50953	10.248	5.02867	30211	268	33	3	9.09091	5.00438	2950|5925|7128	GSTP1|RB1|TNFAIP3	-1.13992	0	3	0	0	-16.3305	56.6279
1	-15.3103	GO:0045936	M1	1	0	GO Biological Processes	19	negative regulation of phosphate metabolic process	19_GO:0048519 negative regulation of biological process	-15.3103	27.0484	18.2011	30211	440	33	13	39.3939	8.50581	2932|2950|3315|3725|5728|5925|6622|7040|7042|7124|7128|7157|7345	GSK3B|GSTP1|HSPB1|JUN|PTEN|RB1|SNCA|TGFB1|TGFB2|TNF|TNFAIP3|TP53|UCHL1	-12.0129	0	4	1	1	-15.3103	30.5162
1	-15.2976	GO:0010563	M1	1	0	GO Biological Processes	19	negative regulation of phosphorus metabolic process	19_GO:0048519 negative regulation of biological process	-15.2976	26.9871	18.1792	30211	441	33	13	39.3939	8.50581	2932|2950|3315|3725|5728|5925|6622|7040|7042|7124|7128|7157|7345	GSK3B|GSTP1|HSPB1|JUN|PTEN|RB1|SNCA|TGFB1|TGFB2|TNF|TNFAIP3|TP53|UCHL1	-12.0129	0	4	0	0	-15.3103	30.5162
1	-13.5216	GO:0043086	M1	1	0	GO Biological Processes	19	negative regulation of catalytic activity	19_GO:0065007 biological regulation	-13.5216	16.3063	14.3784	30211	786	33	14	42.4242	8.6034	301|1728|2932|2950|3315|5728|5743|5925|6622|7042|7124|7128|7157|7345	ANXA1|NQO1|GSK3B|GSTP1|HSPB1|PTEN|PTGS2|RB1|SNCA|TGFB2|TNF|TNFAIP3|TP53|UCHL1	-10.6348	0	4	0	0	-15.3103	30.5162
1	-12.827	GO:0031400	M1	1	0	GO Biological Processes	19	negative regulation of protein modification process	19_GO:0048519 negative regulation of biological process	-12.827	21.1673	15.3249	30211	519	33	12	36.3636	8.37393	2932|2950|3315|3725|5728|5925|5970|6622|7040|7124|7128|7345	GSK3B|GSTP1|HSPB1|JUN|PTEN|RB1|RELA|SNCA|TGFB1|TNF|TNFAIP3|UCHL1	-10.0705	0	4	0	0	-15.3103	30.5162
1	-10.9923	GO:0051348	M1	1	0	GO Biological Processes	19	negative regulation of transferase activity	19_GO:0065007 biological regulation	-10.9923	30.5162	16.11	30211	270	33	9	27.2727	7.75275	2932|2950|3315|5728|5925|6622|7128|7157|7345	GSK3B|GSTP1|HSPB1|PTEN|RB1|SNCA|TNFAIP3|TP53|UCHL1	-8.43798	0	4	0	0	-15.3103	30.5162
1	-10.3118	GO:0045859	M1	1	0	GO Biological Processes	19	regulation of protein kinase activity	19_GO:0008152 metabolic process	-10.3118	15.6129	12.4053	30211	645	33	11	33.3333	8.2061	1956|2950|3315|5728|5925|6622|7040|7042|7124|7128|7345	EGFR|GSTP1|HSPB1|PTEN|RB1|SNCA|TGFB1|TGFB2|TNF|TNFAIP3|UCHL1	-7.86432	0	4	0	0	-15.3103	30.5162
1	-10.0897	GO:0001933	M1	1	0	GO Biological Processes	19	negative regulation of protein phosphorylation	19_GO:0048519 negative regulation of biological process	-10.0897	24.1624	14.2243	30211	341	33	9	27.2727	7.75275	2950|3315|3725|5728|5925|6622|7040|7128|7345	GSTP1|HSPB1|JUN|PTEN|RB1|SNCA|TGFB1|TNFAIP3|UCHL1	-7.67276	0	4	0	0	-15.3103	30.5162
1	-9.75547	GO:0071900	M1	1	0	GO Biological Processes	19	regulation of protein serine/threonine kinase activity	19_GO:0008152 metabolic process	-9.75547	22.1488	13.5723	30211	372	33	9	27.2727	7.75275	1956|2950|5728|5925|6622|7040|7124|7128|7345	EGFR|GSTP1|PTEN|RB1|SNCA|TGFB1|TNF|TNFAIP3|UCHL1	-7.36698	0	4	0	0	-15.3103	30.5162
1	-9.6538	GO:0042326	M1	1	0	GO Biological Processes	19	negative regulation of phosphorylation	19_GO:0048519 negative regulation of biological process	-9.6538	21.569	13.3787	30211	382	33	9	27.2727	7.75275	2950|3315|3725|5728|5925|6622|7040|7128|7345	GSTP1|HSPB1|JUN|PTEN|RB1|SNCA|TGFB1|TNFAIP3|UCHL1	-7.27889	0	4	0	0	-15.3103	30.5162
1	-9.53824	GO:0043549	M1	1	0	GO Biological Processes	19	regulation of kinase activity	19_GO:0008152 metabolic process	-9.53824	13.1983	11.2855	30211	763	33	11	33.3333	8.2061	1956|2950|3315|5728|5925|6622|7040|7042|7124|7128|7345	EGFR|GSTP1|HSPB1|PTEN|RB1|SNCA|TGFB1|TGFB2|TNF|TNFAIP3|UCHL1	-7.18642	0	4	0	0	-15.3103	30.5162
1	-8.54235	GO:0006469	M1	1	0	GO Biological Processes	19	negative regulation of protein kinase activity	19_GO:0048519 negative regulation of biological process	-8.54235	30.0864	14.0871	30211	213	33	7	21.2121	7.11647	2950|3315|5728|5925|6622|7128|7345	GSTP1|HSPB1|PTEN|RB1|SNCA|TNFAIP3|UCHL1	-6.2736	0	4	0	0	-15.3103	30.5162
1	-8.23392	GO:0033673	M1	1	0	GO Biological Processes	19	negative regulation of kinase activity	19_GO:0048519 negative regulation of biological process	-8.23392	27.1542	13.3384	30211	236	33	7	21.2121	7.11647	2950|3315|5728|5925|6622|7128|7345	GSTP1|HSPB1|PTEN|RB1|SNCA|TNFAIP3|UCHL1	-5.99548	0	4	0	0	-15.3103	30.5162
1	-14.1545	GO:0048732	M1	1	0	GO Biological Processes	19	gland development	19_GO:0032502 developmental process	-14.1545	27.3961	17.5961	30211	401	33	12	36.3636	8.37393	301|1956|2194|3162|3725|4609|5594|5728|5970|7040|7042|7124	ANXA1|EGFR|FASN|HMOX1|JUN|MYC|MAPK1|PTEN|RELA|TGFB1|TGFB2|TNF	-11.0459	0	5	1	1	-14.1545	27.3961
1	-13.9645	GO:0030335	M1	1	0	GO Biological Processes	19	positive regulation of cell migration	19_GO:0040011 locomotion	-13.9645	21.2523	15.9969	30211	560	33	13	39.3939	8.50581	301|1956|3162|3309|3315|3725|4609|4780|5594|5743|7040|7042|7124	ANXA1|EGFR|HMOX1|HSPA5|HSPB1|JUN|MYC|NFE2L2|MAPK1|PTGS2|TGFB1|TGFB2|TNF	-10.8906	0	5	0	0	-14.1545	27.3961
1	-13.7316	GO:2000147	M1	1	0	GO Biological Processes	19	positive regulation of cell motility	19_GO:0040011 locomotion	-13.7316	20.3789	15.6379	30211	584	33	13	39.3939	8.50581	301|1956|3162|3309|3315|3725|4609|4780|5594|5743|7040|7042|7124	ANXA1|EGFR|HMOX1|HSPA5|HSPB1|JUN|MYC|NFE2L2|MAPK1|PTGS2|TGFB1|TGFB2|TNF	-10.7198	0	5	0	0	-14.1545	27.3961
1	-13.6188	GO:0051272	M1	1	0	GO Biological Processes	19	positive regulation of cellular component movement	19_GO:0051179 localization	-13.6188	19.9686	15.4664	30211	596	33	13	39.3939	8.50581	301|1956|3162|3309|3315|3725|4609|4780|5594|5743|7040|7042|7124	ANXA1|EGFR|HMOX1|HSPA5|HSPB1|JUN|MYC|NFE2L2|MAPK1|PTGS2|TGFB1|TGFB2|TNF	-10.6359	0	5	0	0	-14.1545	27.3961
1	-13.591	GO:0040017	M1	1	0	GO Biological Processes	19	positive regulation of locomotion	19_GO:0040011 locomotion	-13.591	19.8686	15.4243	30211	599	33	13	39.3939	8.50581	301|1956|3162|3309|3315|3725|4609|4780|5594|5743|7040|7042|7124	ANXA1|EGFR|HMOX1|HSPA5|HSPB1|JUN|MYC|NFE2L2|MAPK1|PTGS2|TGFB1|TGFB2|TNF	-10.6359	0	5	0	0	-14.1545	27.3961
1	-12.7937	GO:0080135	M1	1	0	GO Biological Processes	19	regulation of cellular response to stress	19_GO:0050896 response to stimulus	-12.7937	17.1984	14.2548	30211	692	33	13	39.3939	8.50581	1956|2932|2950|3309|3315|4609|4780|5594|5728|5743|7042|7124|7157	EGFR|GSK3B|GSTP1|HSPA5|HSPB1|MYC|NFE2L2|MAPK1|PTEN|PTGS2|TGFB2|TNF|TP53	-10.0531	0	5	0	0	-14.1545	27.3961
1	-11.5624	GO:0070848	M1	1	0	GO Biological Processes	19	response to growth factor	19_GO:0050896 response to stimulus	-11.5624	20.4266	14.3813	30211	493	33	11	33.3333	8.2061	301|1956|3309|3315|3725|4609|5594|5970|7040|7042|7157	ANXA1|EGFR|HSPA5|HSPB1|JUN|MYC|MAPK1|RELA|TGFB1|TGFB2|TP53	-8.93092	0	5	0	0	-14.1545	27.3961
1	-11.4142	GO:0045596	M1	1	0	GO Biological Processes	19	negative regulation of cell differentiation	19_GO:0032502 developmental process	-11.4142	16.0377	13.1647	30211	685	33	12	36.3636	8.37393	301|1956|2932|4609|4780|5594|5728|5925|7040|7042|7124|7157	ANXA1|EGFR|GSK3B|MYC|NFE2L2|MAPK1|PTEN|RB1|TGFB1|TGFB2|TNF|TP53	-8.81744	0	5	0	0	-14.1545	27.3961
1	-10.3491	GO:0071363	M1	1	0	GO Biological Processes	19	cellular response to growth factor stimulus	19_GO:0050896 response to stimulus	-10.3491	19.7303	13.4452	30211	464	33	10	30.303	8.00006	301|1956|3309|3315|3725|4609|5970|7040|7042|7157	ANXA1|EGFR|HSPA5|HSPB1|JUN|MYC|RELA|TGFB1|TGFB2|TP53	-7.89368	0	5	0	0	-14.1545	27.3961
1	-13.8371	GO:0071417	M1	1	0	GO Biological Processes	19	cellular response to organonitrogen compound	19_GO:0050896 response to stimulus	-13.8371	20.7702	15.7997	30211	573	33	13	39.3939	8.50581	1956|2932|3309|3725|4609|4780|5594|5743|5925|5970|6622|7124|7157	EGFR|GSK3B|HSPA5|JUN|MYC|NFE2L2|MAPK1|PTGS2|RB1|RELA|SNCA|TNF|TP53	-10.7954	0	6	1	1	-13.8371	122.065
1	-13.4244	GO:0034097	M1	1	0	GO Biological Processes	19	response to cytokine	19_GO:0050896 response to stimulus	-13.4244	16.041	14.2487	30211	799	33	14	42.4242	8.6034	246|301|841|2194|2932|3309|4609|4780|5594|5743|5970|6622|7124|7157	ALOX15|ANXA1|CASP8|FASN|GSK3B|HSPA5|MYC|NFE2L2|MAPK1|PTGS2|RELA|SNCA|TNF|TP53	-10.579	0	6	0	0	-13.8371	122.065
1	-13.2942	GO:1901699	M1	1	0	GO Biological Processes	19	cellular response to nitrogen compound	19_GO:0050896 response to stimulus	-13.2942	18.8312	14.9808	30211	632	33	13	39.3939	8.50581	1956|2932|3309|3725|4609|4780|5594|5743|5925|5970|6622|7124|7157	EGFR|GSK3B|HSPA5|JUN|MYC|NFE2L2|MAPK1|PTGS2|RB1|RELA|SNCA|TNF|TP53	-10.4866	0	6	0	0	-13.8371	122.065
1	-12.4102	GO:0009725	M1	1	0	GO Biological Processes	19	response to hormone	19_GO:0050896 response to stimulus	-12.4102	16.0395	13.7164	30211	742	33	13	39.3939	8.50581	301|1728|2932|3162|4609|4734|4780|5743|5925|5970|7040|7042|7124	ANXA1|NQO1|GSK3B|HMOX1|MYC|NEDD4|NFE2L2|PTGS2|RB1|RELA|TGFB1|TGFB2|TNF	-9.74084	0	6	0	0	-13.8371	122.065
1	-10.6332	GO:1901652	M1	1	0	GO Biological Processes	19	response to peptide	19_GO:0050896 response to stimulus	-10.6332	21.0941	13.9431	30211	434	33	10	30.303	8.00006	301|2932|4609|4780|5743|5925|5970|7124|7128|7157	ANXA1|GSK3B|MYC|NFE2L2|PTGS2|RB1|RELA|TNF|TNFAIP3|TP53	-8.14438	0	6	0	0	-13.8371	122.065
1	-8.70232	GO:0034612	M1	1	0	GO Biological Processes	19	response to tumor necrosis factor	19_GO:0050896 response to stimulus	-8.70232	31.7247	14.4886	30211	202	33	7	21.2121	7.11647	841|4780|5594|5743|5970|7124|7157	CASP8|NFE2L2|MAPK1|PTGS2|RELA|TNF|TP53	-6.41211	0	6	0	0	-13.8371	122.065
1	-8.60317	GO:0071345	M1	1	0	GO Biological Processes	19	cellular response to cytokine stimulus	19_GO:0050896 response to stimulus	-8.60317	13.0225	10.6657	30211	703	33	10	30.303	8.00006	246|2194|2932|3309|4609|4780|5594|5970|7124|7157	ALOX15|FASN|GSK3B|HSPA5|MYC|NFE2L2|MAPK1|RELA|TNF|TP53	-6.32915	0	6	0	0	-13.8371	122.065
1	-7.537	GO:1901653	M1	1	0	GO Biological Processes	19	cellular response to peptide	19_GO:0050896 response to stimulus	-7.537	21.5047	11.763	30211	298	33	7	21.2121	7.11647	2932|4609|4780|5925|5970|7124|7157	GSK3B|MYC|NFE2L2|RB1|RELA|TNF|TP53	-5.40225	0	6	0	0	-13.8371	122.065
1	-7.49927	GO:1990776	M1	1	0	GO Biological Processes	19	response to angiotensin	19_GO:0050896 response to stimulus	-7.49927	122.065	21.9381	30211	30	33	4	12.1212	5.68144	4609|4780|5743|5970	MYC|NFE2L2|PTGS2|RELA	-5.37263	0	6	0	0	-13.8371	122.065
1	-7.08595	GO:0043434	M1	1	0	GO Biological Processes	19	response to peptide hormone	19_GO:0050896 response to stimulus	-7.08595	18.468	10.8223	30211	347	33	7	21.2121	7.11647	301|2932|4609|4780|5743|5925|5970	ANXA1|GSK3B|MYC|NFE2L2|PTGS2|RB1|RELA	-5.04113	0	6	0	0	-13.8371	122.065
1	-6.19714	GO:0032870	M1	1	0	GO Biological Processes	19	cellular response to hormone stimulus	19_GO:0050896 response to stimulus	-6.19714	13.6349	9.12913	30211	470	33	7	21.2121	7.11647	301|2932|4609|4734|4780|5925|5970	ANXA1|GSK3B|MYC|NEDD4|NFE2L2|RB1|RELA	-4.29487	0	6	0	0	-13.8371	122.065
1	-5.85592	GO:0071356	M1	1	0	GO Biological Processes	19	cellular response to tumor necrosis factor	19_GO:0050896 response to stimulus	-5.85592	25.7159	10.9364	30211	178	33	5	15.1515	6.24156	4780|5594|5970|7124|7157	NFE2L2|MAPK1|RELA|TNF|TP53	-3.99547	0	6	0	0	-13.8371	122.065
1	-5.62601	GO:1904385	M1	1	0	GO Biological Processes	19	cellular response to angiotensin	19_GO:0050896 response to stimulus	-5.62601	114.436	18.3837	30211	24	33	3	9.09091	5.00438	4609|4780|5970	MYC|NFE2L2|RELA	-3.8074	0	6	0	0	-13.8371	122.065
1	-5.30208	GO:0071375	M1	1	0	GO Biological Processes	19	cellular response to peptide hormone stimulus	19_GO:0050896 response to stimulus	-5.30208	19.8157	9.49287	30211	231	33	5	15.1515	6.24156	2932|4609|4780|5925|5970	GSK3B|MYC|NFE2L2|RB1|RELA	-3.5375	0	6	0	0	-13.8371	122.065
1	-4.69194	GO:0034248	M1	1	0	GO Biological Processes	19	regulation of cellular amide metabolic process	19_GO:0008152 metabolic process	-4.69194	10.423	7.21638	30211	527	33	6	18.1818	6.71408	3315|4780|5970|6622|7124|7157	HSPB1|NFE2L2|RELA|SNCA|TNF|TP53	-3.01998	0	6	0	0	-13.8371	122.065
1	-13.5449	GO:0010942	M1	1	0	GO Biological Processes	19	positive regulation of cell death	19_GO:0048518 positive regulation of biological process	-13.5449	19.7041	15.3549	30211	604	33	13	39.3939	8.50581	301|841|1728|2932|3162|3725|4609|5728|5743|6622|7042|7124|7157	ANXA1|CASP8|NQO1|GSK3B|HMOX1|JUN|MYC|PTEN|PTGS2|SNCA|TGFB2|TNF|TP53	-10.6359	0	7	1	1	-13.5449	73.6597
1	-12.7293	GO:0043065	M1	1	0	GO Biological Processes	19	positive regulation of apoptotic process	19_GO:0048518 positive regulation of biological process	-12.7293	20.7671	15.1674	30211	529	33	12	36.3636	8.37393	301|841|1728|3162|3725|4609|5728|5743|6622|7042|7124|7157	ANXA1|CASP8|NQO1|HMOX1|JUN|MYC|PTEN|PTGS2|SNCA|TGFB2|TNF|TP53	-10.0039	0	7	0	0	-13.5449	73.6597
1	-12.5957	GO:0043068	M1	1	0	GO Biological Processes	19	positive regulation of programmed cell death	19_GO:0048518 positive regulation of biological process	-12.5957	20.2317	14.9541	30211	543	33	12	36.3636	8.37393	301|841|1728|3162|3725|4609|5728|5743|6622|7042|7124|7157	ANXA1|CASP8|NQO1|HMOX1|JUN|MYC|PTEN|PTGS2|SNCA|TGFB2|TNF|TP53	-9.89926	0	7	0	0	-13.5449	73.6597
1	-11.2873	GO:1901216	M1	1	0	GO Biological Processes	19	positive regulation of neuron death	19_GO:0048518 positive regulation of biological process	-11.2873	73.6597	22.4432	30211	87	33	7	21.2121	7.11647	841|1728|2932|6622|7042|7124|7157	CASP8|NQO1|GSK3B|SNCA|TGFB2|TNF|TP53	-8.70155	0	7	0	0	-13.5449	73.6597
1	-10.42	GO:1901214	M1	1	0	GO Biological Processes	19	regulation of neuron death	19_GO:0050789 regulation of biological process	-10.42	26.3238	14.8925	30211	313	33	9	27.2727	7.75275	841|1728|2932|3162|3725|6622|7042|7124|7157	CASP8|NQO1|GSK3B|HMOX1|JUN|SNCA|TGFB2|TNF|TP53	-7.94822	0	7	0	0	-13.5449	73.6597
1	-8.62851	GO:0043523	M1	1	0	GO Biological Processes	19	regulation of neuron apoptotic process	19_GO:0050789 regulation of biological process	-8.62851	30.9584	14.3022	30211	207	33	7	21.2121	7.11647	1728|3162|3725|6622|7042|7124|7157	NQO1|HMOX1|JUN|SNCA|TGFB2|TNF|TP53	-6.34377	0	7	0	0	-13.5449	73.6597
1	-6.51191	GO:0043525	M1	1	0	GO Biological Processes	19	positive regulation of neuron apoptotic process	19_GO:0048518 positive regulation of biological process	-6.51191	70.4219	16.5683	30211	52	33	4	12.1212	5.68144	1728|7042|7124|7157	NQO1|TGFB2|TNF|TP53	-4.55961	0	7	0	0	-13.5449	73.6597
1	-13.3834	GO:1902895	M1	1	0	GO Biological Processes	19	positive regulation of pri-miRNA transcription by RNA polymerase II	19_GO:0048518 positive regulation of biological process	-13.3834	142.409	31.3914	30211	45	33	7	21.2121	7.11647	3725|4609|5970|7040|7042|7124|7157	JUN|MYC|RELA|TGFB1|TGFB2|TNF|TP53	-10.5573	0	8	1	1	-13.3834	142.409
1	-12.5119	GO:1902893	M1	1	0	GO Biological Processes	19	regulation of pri-miRNA transcription by RNA polymerase II	19_GO:0008152 metabolic process	-12.5119	108.617	27.3612	30211	59	33	7	21.2121	7.11647	3725|4609|5970|7040|7042|7124|7157	JUN|MYC|RELA|TGFB1|TGFB2|TNF|TP53	-9.82919	0	8	0	0	-13.3834	142.409
1	-6.67842	GO:0007167	M1	1	0	GO Biological Processes	19	enzyme linked receptor protein signaling pathway	19_GO:0023052 signaling	-6.67842	12.1862	9.1598	30211	601	33	8	24.2424	7.46009	1956|2932|3315|3725|5594|7040|7042|7157	EGFR|GSK3B|HSPB1|JUN|MAPK1|TGFB1|TGFB2|TP53	-4.69742	0	8	0	0	-13.3834	142.409
1	-6.45618	GO:0009611	M1	1	0	GO Biological Processes	19	response to wounding	19_GO:0050896 response to stimulus	-6.45618	14.9032	9.60213	30211	430	33	7	21.2121	7.11647	246|3162|3315|3725|4609|7040|7042	ALOX15|HMOX1|HSPB1|JUN|MYC|TGFB1|TGFB2	-4.5212	0	8	0	0	-13.3834	142.409
1	-6.05752	GO:0050680	M1	1	0	GO Biological Processes	19	negative regulation of epithelial cell proliferation	19_GO:0048519 negative regulation of biological process	-6.05752	28.2557	11.5024	30211	162	33	5	15.1515	6.24156	5728|5925|7040|7042|7124	PTEN|RB1|TGFB1|TGFB2|TNF	-4.17932	0	8	0	0	-13.3834	142.409
1	-5.47422	GO:0007179	M1	1	0	GO Biological Processes	19	transforming growth factor beta receptor signaling pathway	19_GO:0023052 signaling	-5.47422	38.9568	12.1881	30211	94	33	4	12.1212	5.68144	3725|7040|7042|7157	JUN|TGFB1|TGFB2|TP53	-3.68084	0	8	0	0	-13.3834	142.409
1	-5.28038	GO:0001558	M1	1	0	GO Biological Processes	19	regulation of cell growth	19_GO:0040007 growth	-5.28038	13.2359	8.29983	30211	415	33	6	18.1818	6.71408	1956|2932|5925|7040|7042|7157	EGFR|GSK3B|RB1|TGFB1|TGFB2|TP53	-3.52391	0	8	0	0	-13.3834	142.409
1	-5.22215	GO:0040008	M1	1	0	GO Biological Processes	19	regulation of growth	19_GO:0040007 growth	-5.22215	9.70969	7.48127	30211	660	33	7	21.2121	7.11647	1956|2932|5728|5925|7040|7042|7157	EGFR|GSK3B|PTEN|RB1|TGFB1|TGFB2|TP53	-3.47123	0	8	0	0	-13.3834	142.409
1	-5.17793	GO:0045926	M1	1	0	GO Biological Processes	19	negative regulation of growth	19_GO:0040007 growth	-5.17793	18.6834	9.19011	30211	245	33	5	15.1515	6.24156	5728|5925|7040|7042|7157	PTEN|RB1|TGFB1|TGFB2|TP53	-3.43258	0	8	0	0	-13.3834	142.409
1	-5.11987	GO:1905207	M1	1	0	GO Biological Processes	19	regulation of cardiocyte differentiation	19_GO:0032502 developmental process	-5.11987	78.4701	15.1644	30211	35	33	3	9.09091	5.00438	1956|7040|7042	EGFR|TGFB1|TGFB2	-3.39143	0	8	0	0	-13.3834	142.409
1	-4.90996	GO:1905314	M1	1	0	GO Biological Processes	19	semi-lunar valve development	19_GO:0032502 developmental process	-4.90996	66.9867	13.9813	30211	41	33	3	9.09091	5.00438	5925|7040|7042	RB1|TGFB1|TGFB2	-3.20643	0	8	0	0	-13.3834	142.409
1	-4.67048	GO:0071560	M1	1	0	GO Biological Processes	19	cellular response to transforming growth factor beta stimulus	19_GO:0050896 response to stimulus	-4.67048	24.4129	9.50576	30211	150	33	4	12.1212	5.68144	3725|7040|7042|7157	JUN|TGFB1|TGFB2|TP53	-3.00248	0	8	0	0	-13.3834	142.409
1	-4.5928	GO:0071559	M1	1	0	GO Biological Processes	19	response to transforming growth factor beta	19_GO:0050896 response to stimulus	-4.5928	23.3245	9.27399	30211	157	33	4	12.1212	5.68144	3725|7040|7042|7157	JUN|TGFB1|TGFB2|TP53	-2.93899	0	8	0	0	-13.3834	142.409
1	-4.58044	GO:0042060	M1	1	0	GO Biological Processes	19	wound healing	19_GO:0050896 response to stimulus	-4.58044	14.0412	7.82864	30211	326	33	5	15.1515	6.24156	246|3162|3315|7040|7042	ALOX15|HMOX1|HSPB1|TGFB1|TGFB2	-2.92917	0	8	0	0	-13.3834	142.409
1	-4.52336	GO:0003179	M1	1	0	GO Biological Processes	19	heart valve morphogenesis	19_GO:0032502 developmental process	-4.52336	49.9355	12.0117	30211	55	33	3	9.09091	5.00438	5925|7040|7042	RB1|TGFB1|TGFB2	-2.88084	0	8	0	0	-13.3834	142.409
1	-4.47772	GO:0048762	M1	1	0	GO Biological Processes	19	mesenchymal cell differentiation	19_GO:0032502 developmental process	-4.47772	21.7973	8.93874	30211	168	33	4	12.1212	5.68144	2932|5594|7040|7042	GSK3B|MAPK1|TGFB1|TGFB2	-2.84749	0	8	0	0	-13.3834	142.409
1	-4.388	GO:0060395	M1	1	0	GO Biological Processes	19	SMAD protein signal transduction	19_GO:0023052 signaling	-4.388	45.0238	11.3814	30211	61	33	3	9.09091	5.00438	3725|7040|7042	JUN|TGFB1|TGFB2	-2.76954	0	8	0	0	-13.3834	142.409
1	-4.30539	GO:0007178	M1	1	0	GO Biological Processes	19	transmembrane receptor protein serine/threonine kinase signaling pathway	19_GO:0023052 signaling	-4.30539	19.6878	8.45398	30211	186	33	4	12.1212	5.68144	3725|7040|7042|7157	JUN|TGFB1|TGFB2|TP53	-2.70056	0	8	0	0	-13.3834	142.409
1	-4.30539	GO:0030308	M1	1	0	GO Biological Processes	19	negative regulation of cell growth	19_GO:0040007 growth	-4.30539	19.6878	8.45398	30211	186	33	4	12.1212	5.68144	5925|7040|7042|7157	RB1|TGFB1|TGFB2|TP53	-2.70056	0	8	0	0	-13.3834	142.409
1	-4.30519	GO:0003170	M1	1	0	GO Biological Processes	19	heart valve development	19_GO:0032502 developmental process	-4.30519	42.2531	11.01	30211	65	33	3	9.09091	5.00438	5925|7040|7042	RB1|TGFB1|TGFB2	-2.70056	0	8	0	0	-13.3834	142.409
1	-4.27837	GO:1901654	M1	1	0	GO Biological Processes	19	response to ketone	19_GO:0050896 response to stimulus	-4.27837	19.3753	8.3798	30211	189	33	4	12.1212	5.68144	1728|4609|7040|7042	NQO1|MYC|TGFB1|TGFB2	-2.67712	0	8	0	0	-13.3834	142.409
1	-4.06843	GO:0001837	M1	1	0	GO Biological Processes	19	epithelial to mesenchymal transition	19_GO:0032502 developmental process	-4.06843	35.211	10.0041	30211	78	33	3	9.09091	5.00438	2932|7040|7042	GSK3B|TGFB1|TGFB2	-2.50385	0	8	0	0	-13.3834	142.409
1	-3.94848	GO:0060485	M1	1	0	GO Biological Processes	19	mesenchyme development	19_GO:0032502 developmental process	-3.94848	15.9215	7.51173	30211	230	33	4	12.1212	5.68144	2932|5594|7040|7042	GSK3B|MAPK1|TGFB1|TGFB2	-2.40706	0	8	0	0	-13.3834	142.409
1	-3.80938	GO:0003007	M1	1	0	GO Biological Processes	19	heart morphogenesis	19_GO:0032502 developmental process	-3.80938	14.6478	7.1654	30211	250	33	4	12.1212	5.68144	3725|7040|7042|7157	JUN|TGFB1|TGFB2|TP53	-2.2862	0	8	0	0	-13.3834	142.409
1	-3.72266	GO:0010717	M1	1	0	GO Biological Processes	19	regulation of epithelial to mesenchymal transition	19_GO:0032502 developmental process	-3.72266	26.926	8.67311	30211	102	33	3	9.09091	5.00438	5728|7040|7042	PTEN|TGFB1|TGFB2	-2.22502	0	8	0	0	-13.3834	142.409
1	-3.65722	GO:1903532	M1	1	0	GO Biological Processes	19	positive regulation of secretion by cell	19_GO:0051179 localization	-3.65722	13.3647	6.79897	30211	274	33	4	12.1212	5.68144	2182|6622|7040|7042	ACSL4|SNCA|TGFB1|TGFB2	-2.16662	0	8	0	0	-13.3834	142.409
1	-3.58059	GO:0014706	M1	1	0	GO Biological Processes	19	striated muscle tissue development	19_GO:0032502 developmental process	-3.58059	12.7594	6.61915	30211	287	33	4	12.1212	5.68144	5728|5925|7040|7042	PTEN|RB1|TGFB1|TGFB2	-2.09828	0	8	0	0	-13.3834	142.409
1	-3.53622	GO:0030278	M1	1	0	GO Biological Processes	19	regulation of ossification	19_GO:0032501 multicellular organismal process	-3.53622	23.275	8.01704	30211	118	33	3	9.09091	5.00438	5594|7040|7042	MAPK1|TGFB1|TGFB2	-2.0585	0	8	0	0	-13.3834	142.409
1	-3.50757	GO:0051047	M1	1	0	GO Biological Processes	19	positive regulation of secretion	19_GO:0051179 localization	-3.50757	12.2065	6.45061	30211	300	33	4	12.1212	5.68144	2182|6622|7040|7042	ACSL4|SNCA|TGFB1|TGFB2	-2.03407	0	8	0	0	-13.3834	142.409
1	-3.47499	GO:0060537	M1	1	0	GO Biological Processes	19	muscle tissue development	19_GO:0032502 developmental process	-3.47499	11.9671	6.3763	30211	306	33	4	12.1212	5.68144	5728|5925|7040|7042	PTEN|RB1|TGFB1|TGFB2	-2.00483	0	8	0	0	-13.3834	142.409
1	-3.45262	GO:0003206	M1	1	0	GO Biological Processes	19	cardiac chamber morphogenesis	19_GO:0032502 developmental process	-3.45262	21.7973	7.73577	30211	126	33	3	9.09091	5.00438	7040|7042|7157	TGFB1|TGFB2|TP53	-1.98495	0	8	0	0	-13.3834	142.409
1	-3.43258	GO:0050714	M1	1	0	GO Biological Processes	19	positive regulation of protein secretion	19_GO:0051179 localization	-3.43258	21.4567	7.66949	30211	128	33	3	9.09091	5.00438	2182|7040|7042	ACSL4|TGFB1|TGFB2	-1.96821	0	8	0	0	-13.3834	142.409
1	-3.11903	GO:0048863	M1	1	0	GO Biological Processes	19	stem cell differentiation	19_GO:0032502 developmental process	-3.11903	16.7467	6.68648	30211	164	33	3	9.09091	5.00438	5594|7042|7157	MAPK1|TGFB2|TP53	-1.69011	0	8	0	0	-13.3834	142.409
1	-3.09624	GO:0003205	M1	1	0	GO Biological Processes	19	cardiac chamber development	19_GO:0032502 developmental process	-3.09624	16.4458	6.61878	30211	167	33	3	9.09091	5.00438	7040|7042|7157	TGFB1|TGFB2|TP53	-1.67333	0	8	0	0	-13.3834	142.409
1	-3.05191	GO:0048738	M1	1	0	GO Biological Processes	19	cardiac muscle tissue development	19_GO:0032502 developmental process	-3.05191	15.8755	6.48851	30211	173	33	3	9.09091	5.00438	5728|7040|7042	PTEN|TGFB1|TGFB2	-1.63271	0	8	0	0	-13.3834	142.409
1	-3.0397	GO:0006468	M1	1	0	GO Biological Processes	19	protein phosphorylation	19_GO:0008152 metabolic process	-3.0397	6.53918	4.90331	30211	700	33	5	15.1515	6.24156	1956|2932|5594|7040|7042	EGFR|GSK3B|MAPK1|TGFB1|TGFB2	-1.62125	0	8	0	0	-13.3834	142.409
1	-2.96116	GO:0051302	M1	1	0	GO Biological Processes	19	regulation of cell division	19_GO:0050789 regulation of biological process	-2.96116	14.7659	6.22739	30211	186	33	3	9.09091	5.00438	4609|7040|7042	MYC|TGFB1|TGFB2	-1.55509	0	8	0	0	-13.3834	142.409
1	-2.87522	GO:0002009	M1	1	0	GO Biological Processes	19	morphogenesis of an epithelium	19_GO:0032502 developmental process	-2.87522	8.26623	5.09475	30211	443	33	4	12.1212	5.68144	1956|4609|7040|7042	EGFR|MYC|TGFB1|TGFB2	-1.47556	0	8	0	0	-13.3834	142.409
1	-2.7693	GO:0008406	M1	1	0	GO Biological Processes	19	gonad development	19_GO:0022414 reproductive process	-2.7693	12.6565	5.69858	30211	217	33	3	9.09091	5.00438	3309|4609|7042	HSPA5|MYC|TGFB2	-1.37595	0	8	0	0	-13.3834	142.409
1	-2.74773	GO:0061061	M1	1	0	GO Biological Processes	19	muscle structure development	19_GO:0032502 developmental process	-2.74773	7.62904	4.84121	30211	480	33	4	12.1212	5.68144	5925|7040|7042|7345	RB1|TGFB1|TGFB2|UCHL1	-1.35508	0	8	0	0	-13.3834	142.409
1	-2.74109	GO:0045137	M1	1	0	GO Biological Processes	19	development of primary sexual characteristics	19_GO:0022414 reproductive process	-2.74109	12.3714	5.62338	30211	222	33	3	9.09091	5.00438	3309|4609|7042	HSPA5|MYC|TGFB2	-1.34983	0	8	0	0	-13.3834	142.409
1	-2.6991	GO:0001501	M1	1	0	GO Biological Processes	19	skeletal system development	19_GO:0032502 developmental process	-2.6991	7.39786	4.74601	30211	495	33	4	12.1212	5.68144	5925|7040|7042|7157	RB1|TGFB1|TGFB2|TP53	-1.3113	0	8	0	0	-13.3834	142.409
1	-2.52253	GO:0048729	M1	1	0	GO Biological Processes	19	tissue morphogenesis	19_GO:0032502 developmental process	-2.52253	6.61	4.40698	30211	554	33	4	12.1212	5.68144	1956|4609|7040|7042	EGFR|MYC|TGFB1|TGFB2	-1.15095	0	8	0	0	-13.3834	142.409
1	-2.48696	GO:0007548	M1	1	0	GO Biological Processes	19	sex differentiation	19_GO:0022414 reproductive process	-2.48696	10.0603	4.97277	30211	273	33	3	9.09091	5.00438	3309|4609|7042	HSPA5|MYC|TGFB2	-1.11933	0	8	0	0	-13.3834	142.409
1	-2.46202	GO:0048598	M1	1	0	GO Biological Processes	19	embryonic morphogenesis	19_GO:0032502 developmental process	-2.46202	6.35753	4.293	30211	576	33	4	12.1212	5.68144	5594|7040|7042|7157	MAPK1|TGFB1|TGFB2|TP53	-1.09635	0	8	0	0	-13.3834	142.409
1	-2.43457	GO:0007517	M1	1	0	GO Biological Processes	19	muscle organ development	19_GO:0032502 developmental process	-2.43457	9.63668	4.84431	30211	285	33	3	9.09091	5.00438	5925|7040|7042	RB1|TGFB1|TGFB2	-1.07151	0	8	0	0	-13.3834	142.409
1	-2.34443	GO:0060562	M1	1	0	GO Biological Processes	19	epithelial tube morphogenesis	19_GO:0032502 developmental process	-2.34443	8.94611	4.6275	30211	307	33	3	9.09091	5.00438	4609|7040|7042	MYC|TGFB1|TGFB2	-0.985255	0	8	0	0	-13.3834	142.409
1	-12.9773	GO:0071407	M1	1	0	GO Biological Processes	19	cellular response to organic cyclic compound	19_GO:0050896 response to stimulus	-12.9773	21.7973	15.5697	30211	504	33	12	36.3636	8.37393	301|841|1956|2932|3309|4609|4734|5594|5743|6622|7040|7124	ANXA1|CASP8|EGFR|GSK3B|HSPA5|MYC|NEDD4|MAPK1|PTGS2|SNCA|TGFB1|TNF	-10.1874	0	9	1	1	-12.9773	21.7973
1	-11.5058	GO:0071396	M1	1	0	GO Biological Processes	19	cellular response to lipid	19_GO:0050896 response to stimulus	-11.5058	20.181	14.2871	30211	499	33	11	33.3333	8.2061	301|1956|2932|2950|4609|4734|5594|5970|7040|7124|7128	ANXA1|EGFR|GSK3B|GSTP1|MYC|NEDD4|MAPK1|RELA|TGFB1|TNF|TNFAIP3	-8.8862	0	9	0	0	-12.9773	21.7973
1	-9.39061	GO:0060341	M1	1	0	GO Biological Processes	19	regulation of cellular localization	19_GO:0051179 localization	-9.39061	12.7796	11.0799	30211	788	33	11	33.3333	8.2061	1956|2932|3162|4734|5594|5728|5743|5925|6622|7040|7124	EGFR|GSK3B|HMOX1|NEDD4|MAPK1|PTEN|PTGS2|RB1|SNCA|TGFB1|TNF	-7.05404	0	9	0	0	-12.9773	21.7973
1	-12.8549	GO:0043620	M1	1	0	GO Biological Processes	19	regulation of DNA-templated transcription in response to stress	19_GO:0050896 response to stimulus	-12.8549	120.913	28.8928	30211	53	33	7	21.2121	7.11647	3162|3309|3725|4734|4780|5970|7157	HMOX1|HSPA5|JUN|NEDD4|NFE2L2|RELA|TP53	-10.0821	0	10	1	1	-12.8549	228.871
1	-10.9618	GO:0043618	M1	1	0	GO Biological Processes	19	regulation of transcription from RNA polymerase II promoter in response to stress	19_GO:0050896 response to stimulus	-10.9618	116.87	26.2884	30211	47	33	6	18.1818	6.71408	3162|3309|3725|4734|4780|7157	HMOX1|HSPA5|JUN|NEDD4|NFE2L2|TP53	-8.4272	0	10	0	0	-12.8549	228.871
1	-7.90873	GO:1901522	M1	1	0	GO Biological Processes	19	positive regulation of transcription from RNA polymerase II promoter involved in cellular response to chemical stimulus	19_GO:0048518 positive regulation of biological process	-7.90873	152.581	24.5656	30211	24	33	4	12.1212	5.68144	3725|4780|5970|7157	JUN|NFE2L2|RELA|TP53	-5.71654	0	10	0	0	-12.8549	228.871
1	-7.74027	GO:0031667	M1	1	0	GO Biological Processes	19	response to nutrient levels	19_GO:0050896 response to stimulus	-7.74027	16.7594	10.9736	30211	437	33	8	24.2424	7.46009	1728|3162|3309|4780|5594|5743|7124|7157	NQO1|HMOX1|HSPA5|NFE2L2|MAPK1|PTGS2|TNF|TP53	-5.57774	0	10	0	0	-12.8549	228.871
1	-7.50722	GO:0071496	M1	1	0	GO Biological Processes	19	cellular response to external stimulus	19_GO:0050896 response to stimulus	-7.50722	21.2903	11.6991	30211	301	33	7	21.2121	7.11647	841|3162|3309|4780|5594|5743|7157	CASP8|HMOX1|HSPA5|NFE2L2|MAPK1|PTGS2|TP53	-5.3763	0	10	0	0	-12.8549	228.871
1	-7.496	GO:0009991	M1	1	0	GO Biological Processes	19	response to extracellular stimulus	19_GO:0050896 response to stimulus	-7.496	15.5827	10.5365	30211	470	33	8	24.2424	7.46009	1728|3162|3309|4780|5594|5743|7124|7157	NQO1|HMOX1|HSPA5|NFE2L2|MAPK1|PTGS2|TNF|TP53	-5.37263	0	10	0	0	-12.8549	228.871
1	-7.43961	GO:0006984	M1	1	0	GO Biological Processes	19	ER-nucleus signaling pathway	19_GO:0023052 signaling	-7.43961	118.127	21.5757	30211	31	33	4	12.1212	5.68144	2932|3309|4780|7157	GSK3B|HSPA5|NFE2L2|TP53	-5.33456	0	10	0	0	-12.8549	228.871
1	-6.58592	GO:0006983	M1	1	0	GO Biological Processes	19	ER overload response	19_GO:0023052 signaling	-6.58592	228.871	26.1078	30211	12	33	3	9.09091	5.00438	2932|3309|7157	GSK3B|HSPA5|TP53	-4.6208	0	10	0	0	-12.8549	228.871
1	-5.62601	GO:0036003	M1	1	0	GO Biological Processes	19	positive regulation of transcription from RNA polymerase II promoter in response to stress	19_GO:0048518 positive regulation of biological process	-5.62601	114.436	18.3837	30211	24	33	3	9.09091	5.00438	3309|4780|7157	HSPA5|NFE2L2|TP53	-3.8074	0	10	0	0	-12.8549	228.871
1	-5.55505	GO:0031669	M1	1	0	GO Biological Processes	19	cellular response to nutrient levels	19_GO:0050896 response to stimulus	-5.55505	22.3289	10.1328	30211	205	33	5	15.1515	6.24156	3162|3309|4780|5594|7157	HMOX1|HSPA5|NFE2L2|MAPK1|TP53	-3.75283	0	10	0	0	-12.8549	228.871
1	-5.24793	GO:0031668	M1	1	0	GO Biological Processes	19	cellular response to extracellular stimulus	19_GO:0050896 response to stimulus	-5.24793	19.314	9.35993	30211	237	33	5	15.1515	6.24156	3162|3309|4780|5594|7157	HMOX1|HSPA5|NFE2L2|MAPK1|TP53	-3.49467	0	10	0	0	-12.8549	228.871
1	-4.75806	GO:0046677	M1	1	0	GO Biological Processes	19	response to antibiotic	19_GO:0050896 response to stimulus	-4.75806	59.7055	13.1763	30211	46	33	3	9.09091	5.00438	841|3309|7157	CASP8|HSPA5|TP53	-3.06992	0	10	0	0	-12.8549	228.871
1	-4.64837	GO:0042149	M1	1	0	GO Biological Processes	19	cellular response to glucose starvation	19_GO:0050896 response to stimulus	-4.64837	54.9291	12.6204	30211	50	33	3	9.09091	5.00438	3309|4780|7157	HSPA5|NFE2L2|TP53	-2.98298	0	10	0	0	-12.8549	228.871
1	-4.59688	GO:0051402	M1	1	0	GO Biological Processes	19	neuron apoptotic process	19_GO:0009987 cellular process	-4.59688	52.8164	12.3665	30211	52	33	3	9.09091	5.00438	3309|5925|7157	HSPA5|RB1|TP53	-2.94053	0	10	0	0	-12.8549	228.871
1	-4.5606	GO:0009267	M1	1	0	GO Biological Processes	19	cellular response to starvation	19_GO:0050896 response to stimulus	-4.5606	22.8871	9.17923	30211	160	33	4	12.1212	5.68144	3309|4780|5594|7157	HSPA5|NFE2L2|MAPK1|TP53	-2.91184	0	10	0	0	-12.8549	228.871
1	-4.40958	GO:0070997	M1	1	0	GO Biological Processes	19	neuron death	19_GO:0009987 cellular process	-4.40958	45.7742	11.48	30211	60	33	3	9.09091	5.00438	3309|5925|7157	HSPA5|RB1|TP53	-2.78995	0	10	0	0	-12.8549	228.871
1	-4.21703	GO:0042594	M1	1	0	GO Biological Processes	19	response to starvation	19_GO:0050896 response to stimulus	-4.21703	18.6834	8.21317	30211	196	33	4	12.1212	5.68144	3309|4780|5594|7157	HSPA5|NFE2L2|MAPK1|TP53	-2.62689	0	10	0	0	-12.8549	228.871
1	-3.77402	GO:0021549	M1	1	0	GO Biological Processes	19	cerebellum development	19_GO:0032502 developmental process	-3.77402	28.025	8.86114	30211	98	33	3	9.09091	5.00438	1152|3309|7157	CKB|HSPA5|TP53	-2.25921	0	10	0	0	-12.8549	228.871
1	-3.70009	GO:0090092	M1	1	0	GO Biological Processes	19	regulation of transmembrane receptor protein serine/threonine kinase signaling pathway	19_GO:0023052 signaling	-3.70009	13.7151	6.90095	30211	267	33	4	12.1212	5.68144	3309|7040|7042|7157	HSPA5|TGFB1|TGFB2|TP53	-2.20687	0	10	0	0	-12.8549	228.871
1	-3.66131	GO:0022037	M1	1	0	GO Biological Processes	19	metencephalon development	19_GO:0032502 developmental process	-3.66131	25.6678	8.45274	30211	107	33	3	9.09091	5.00438	1152|3309|7157	CKB|HSPA5|TP53	-2.16984	0	10	0	0	-12.8549	228.871
1	-3.43261	GO:0090287	M1	1	0	GO Biological Processes	19	regulation of cellular response to growth factor stimulus	19_GO:0050896 response to stimulus	-3.43261	11.6622	6.28038	30211	314	33	4	12.1212	5.68144	3309|4734|7040|7157	HSPA5|NEDD4|TGFB1|TP53	-1.96821	0	10	0	0	-12.8549	228.871
1	-3.41287	GO:0017015	M1	1	0	GO Biological Processes	19	regulation of transforming growth factor beta receptor signaling pathway	19_GO:0023052 signaling	-3.41287	21.1266	7.60471	30211	130	33	3	9.09091	5.00438	3309|7040|7157	HSPA5|TGFB1|TP53	-1.94932	0	10	0	0	-12.8549	228.871
1	-3.4067	GO:0072594	M1	1	0	GO Biological Processes	19	establishment of protein localization to organelle	19_GO:0051179 localization	-3.4067	11.4794	6.22218	30211	319	33	4	12.1212	5.68144	3309|4734|7128|7157	HSPA5|NEDD4|TNFAIP3|TP53	-1.94478	0	10	0	0	-12.8549	228.871
1	-3.38388	GO:1903844	M1	1	0	GO Biological Processes	19	regulation of cellular response to transforming growth factor beta stimulus	19_GO:0050896 response to stimulus	-3.38388	20.65	7.5102	30211	133	33	3	9.09091	5.00438	3309|7040|7157	HSPA5|TGFB1|TP53	-1.92441	0	10	0	0	-12.8549	228.871
1	-3.26569	GO:0030902	M1	1	0	GO Biological Processes	19	hindbrain development	19_GO:0032502 developmental process	-3.26569	18.8113	7.13394	30211	146	33	3	9.09091	5.00438	1152|3309|7157	CKB|HSPA5|TP53	-1.82527	0	10	0	0	-12.8549	228.871
1	-3.15143	GO:0033365	M1	1	0	GO Biological Processes	19	protein localization to organelle	19_GO:0051179 localization	-3.15143	6.925	5.09328	30211	661	33	5	15.1515	6.24156	3309|4734|5925|7128|7157	HSPA5|NEDD4|RB1|TNFAIP3|TP53	-1.72023	0	10	0	0	-12.8549	228.871
1	-3.14847	GO:0006886	M1	1	0	GO Biological Processes	19	intracellular protein transport	19_GO:0051179 localization	-3.14847	6.91454	5.08822	30211	662	33	5	15.1515	6.24156	3309|3315|4734|7040|7157	HSPA5|HSPB1|NEDD4|TGFB1|TP53	-1.71804	0	10	0	0	-12.8549	228.871
1	-12.5957	GO:1902532	M1	1	0	GO Biological Processes	19	negative regulation of intracellular signal transduction	19_GO:0023052 signaling	-12.5957	20.2317	14.9541	30211	543	33	12	36.3636	8.37393	841|2932|2950|3315|4609|4780|5728|5743|5970|7042|7128|7345	CASP8|GSK3B|GSTP1|HSPB1|MYC|NFE2L2|PTEN|PTGS2|RELA|TGFB2|TNFAIP3|UCHL1	-9.89926	0	11	1	1	-12.5957	20.2317
1	-12.3632	GO:0010632	M1	1	0	GO Biological Processes	19	regulation of epithelial cell migration	19_GO:0040011 locomotion	-12.3632	31.5684	17.297	30211	290	33	10	30.303	8.00006	301|3162|3315|3725|4780|5728|5743|7040|7042|7124	ANXA1|HMOX1|HSPB1|JUN|NFE2L2|PTEN|PTGS2|TGFB1|TGFB2|TNF	-9.70689	0	12	1	1	-12.3632	73.2388
1	-10.8981	GO:0010634	M1	1	0	GO Biological Processes	19	positive regulation of epithelial cell migration	19_GO:0040011 locomotion	-10.8981	42.0913	17.9756	30211	174	33	8	24.2424	7.46009	301|3162|3315|3725|4780|5743|7040|7042	ANXA1|HMOX1|HSPB1|JUN|NFE2L2|PTGS2|TGFB1|TGFB2	-8.38234	0	12	0	0	-12.3632	73.2388
1	-9.99878	GO:0006954	M1	1	0	GO Biological Processes	19	inflammatory response	19_GO:0050896 response to stimulus	-9.99878	18.1644	12.8499	30211	504	33	10	30.303	8.00006	246|301|2194|3162|4780|5743|5970|7040|7124|7128	ALOX15|ANXA1|FASN|HMOX1|NFE2L2|PTGS2|RELA|TGFB1|TNF|TNFAIP3	-7.60334	0	12	0	0	-12.3632	73.2388
1	-9.69808	GO:0043536	M1	1	0	GO Biological Processes	19	positive regulation of blood vessel endothelial cell migration	19_GO:0040011 locomotion	-9.69808	73.2388	20.7131	30211	75	33	6	18.1818	6.71408	301|3162|3315|4780|5743|7040	ANXA1|HMOX1|HSPB1|NFE2L2|PTGS2|TGFB1	-7.31643	0	12	0	0	-12.3632	73.2388
1	-9.60613	GO:0043535	M1	1	0	GO Biological Processes	19	regulation of blood vessel endothelial cell migration	19_GO:0040011 locomotion	-9.60613	42.7226	16.9396	30211	150	33	7	21.2121	7.11647	301|3162|3315|4780|5743|7040|7124	ANXA1|HMOX1|HSPB1|NFE2L2|PTGS2|TGFB1|TNF	-7.23784	0	12	0	0	-12.3632	73.2388
1	-8.31127	GO:0010594	M1	1	0	GO Biological Processes	19	regulation of endothelial cell migration	19_GO:0040011 locomotion	-8.31127	27.8626	13.5231	30211	230	33	7	21.2121	7.11647	301|3162|3315|4780|5743|7040|7124	ANXA1|HMOX1|HSPB1|NFE2L2|PTGS2|TGFB1|TNF	-6.05794	0	12	0	0	-12.3632	73.2388
1	-8.22486	GO:0010595	M1	1	0	GO Biological Processes	19	positive regulation of endothelial cell migration	19_GO:0040011 locomotion	-8.22486	41.9306	15.525	30211	131	33	6	18.1818	6.71408	301|3162|3315|4780|5743|7040	ANXA1|HMOX1|HSPB1|NFE2L2|PTGS2|TGFB1	-5.99127	0	12	0	0	-12.3632	73.2388
1	-7.83393	GO:0002683	M1	1	0	GO Biological Processes	19	negative regulation of immune system process	19_GO:0002376 immune system process	-7.83393	17.2327	11.1446	30211	425	33	8	24.2424	7.46009	246|301|3162|4609|7040|7042|7124|7128	ALOX15|ANXA1|HMOX1|MYC|TGFB1|TGFB2|TNF|TNFAIP3	-5.66255	0	12	0	0	-12.3632	73.2388
1	-7.46058	GO:0001819	M1	1	0	GO Biological Processes	19	positive regulation of cytokine production	19_GO:0048518 positive regulation of biological process	-7.46058	15.4187	10.4741	30211	475	33	8	24.2424	7.46009	301|841|3162|3315|5743|5970|7040|7124	ANXA1|CASP8|HMOX1|HSPB1|PTGS2|RELA|TGFB1|TNF	-5.34093	0	12	0	0	-12.3632	73.2388
1	-6.953	GO:0001818	M1	1	0	GO Biological Processes	19	negative regulation of cytokine production	19_GO:0048519 negative regulation of biological process	-6.953	17.654	10.556	30211	363	33	7	21.2121	7.11647	301|2950|3162|7040|7042|7124|7128	ANXA1|GSTP1|HMOX1|TGFB1|TGFB2|TNF|TNFAIP3	-4.92952	0	12	0	0	-12.3632	73.2388
1	-5.73927	GO:0002819	M1	1	0	GO Biological Processes	19	regulation of adaptive immune response	19_GO:0002376 immune system process	-5.73927	24.348	10.6191	30211	188	33	5	15.1515	6.24156	246|301|7040|7124|7128	ALOX15|ANXA1|TGFB1|TNF|TNFAIP3	-3.89583	0	12	0	0	-12.3632	73.2388
1	-5.13345	GO:0050865	M1	1	0	GO Biological Processes	19	regulation of cell activation	19_GO:0050789 regulation of biological process	-5.13345	9.41027	7.34072	30211	681	33	7	21.2121	7.11647	301|3162|6622|7040|7124|7128|114757	ANXA1|HMOX1|SNCA|TGFB1|TNF|TNFAIP3|CYGB	-3.39587	0	12	0	0	-12.3632	73.2388
1	-4.42799	GO:0002822	M1	1	0	GO Biological Processes	19	regulation of adaptive immune response based on somatic recombination of immune receptors built from immunoglobulin superfamily domains	19_GO:0002376 immune system process	-4.42799	21.1673	8.79674	30211	173	33	4	12.1212	5.68144	301|7040|7124|7128	ANXA1|TGFB1|TNF|TNFAIP3	-2.80364	0	12	0	0	-12.3632	73.2388
1	-4.26307	GO:0002694	M1	1	0	GO Biological Processes	19	regulation of leukocyte activation	19_GO:0002376 immune system process	-4.26307	8.73276	6.48087	30211	629	33	6	18.1818	6.71408	301|3162|6622|7040|7124|7128	ANXA1|HMOX1|SNCA|TGFB1|TNF|TNFAIP3	-2.66741	0	12	0	0	-12.3632	73.2388
1	-11.2117	GO:0050678	M1	1	0	GO Biological Processes	19	regulation of epithelial cell proliferation	19_GO:0050789 regulation of biological process	-11.2117	24.1553	15.0008	30211	379	33	10	30.303	8.00006	1956|3162|3725|4609|5728|5925|7040|7042|7124|7128	EGFR|HMOX1|JUN|MYC|PTEN|RB1|TGFB1|TGFB2|TNF|TNFAIP3	-8.63663	0	13	1	1	-11.2117	94.7053
1	-10.9793	GO:0048660	M1	1	0	GO Biological Processes	19	regulation of smooth muscle cell proliferation	19_GO:0050789 regulation of biological process	-10.9793	43.0816	18.1948	30211	170	33	8	24.2424	7.46009	3162|3725|4609|5728|5743|7040|7124|7128	HMOX1|JUN|MYC|PTEN|PTGS2|TGFB1|TNF|TNFAIP3	-8.43491	0	13	0	0	-11.2117	94.7053
1	-10.9352	GO:0001666	M1	1	0	GO Biological Processes	19	response to hypoxia	19_GO:0050896 response to stimulus	-10.9352	30.0707	15.985	30211	274	33	9	27.2727	7.75275	3162|4609|4780|5728|5743|7042|7124|7157|114757	HMOX1|MYC|NFE2L2|PTEN|PTGS2|TGFB2|TNF|TP53|CYGB	-8.41017	0	13	0	0	-11.2117	94.7053
1	-10.7555	GO:0036293	M1	1	0	GO Biological Processes	19	response to decreased oxygen levels	19_GO:0050896 response to stimulus	-10.7555	28.7086	15.5967	30211	287	33	9	27.2727	7.75275	3162|4609|4780|5728|5743|7042|7124|7157|114757	HMOX1|MYC|NFE2L2|PTEN|PTGS2|TGFB2|TNF|TP53|CYGB	-8.2489	0	13	0	0	-11.2117	94.7053
1	-10.7335	GO:0008285	M1	1	0	GO Biological Processes	19	negative regulation of cell population proliferation	19_GO:0048519 negative regulation of biological process	-10.7335	14.0125	12.2077	30211	784	33	12	36.3636	8.37393	2950|3162|3725|4609|5728|5743|5925|7040|7042|7124|7128|7157	GSTP1|HMOX1|JUN|MYC|PTEN|PTGS2|RB1|TGFB1|TGFB2|TNF|TNFAIP3|TP53	-8.23588	0	13	0	0	-11.2117	94.7053
1	-10.4697	GO:0070482	M1	1	0	GO Biological Processes	19	response to oxygen levels	19_GO:0050896 response to stimulus	-10.4697	26.6646	14.9952	30211	309	33	9	27.2727	7.75275	3162|4609|4780|5728|5743|7042|7124|7157|114757	HMOX1|MYC|NFE2L2|PTEN|PTGS2|TGFB2|TNF|TP53|CYGB	-7.98946	0	13	0	0	-11.2117	94.7053
1	-9.06964	GO:0048661	M1	1	0	GO Biological Processes	19	positive regulation of smooth muscle cell proliferation	19_GO:0048518 positive regulation of biological process	-9.06964	57.8201	18.3422	30211	95	33	6	18.1818	6.71408	3162|3725|4609|5743|7040|7124	HMOX1|JUN|MYC|PTGS2|TGFB1|TNF	-6.75687	0	13	0	0	-11.2117	94.7053
1	-8.41111	GO:0001889	M1	1	0	GO Biological Processes	19	liver development	19_GO:0032502 developmental process	-8.41111	45.0238	16.1121	30211	122	33	6	18.1818	6.71408	301|3162|3725|4609|5970|7124	ANXA1|HMOX1|JUN|MYC|RELA|TNF	-6.14755	0	13	0	0	-11.2117	94.7053
1	-8.34748	GO:0061008	M1	1	0	GO Biological Processes	19	hepaticobiliary system development	19_GO:0032502 developmental process	-8.34748	43.9433	15.9094	30211	125	33	6	18.1818	6.71408	301|3162|3725|4609|5970|7124	ANXA1|HMOX1|JUN|MYC|RELA|TNF	-6.08907	0	13	0	0	-11.2117	94.7053
1	-8.26508	GO:0071456	M1	1	0	GO Biological Processes	19	cellular response to hypoxia	19_GO:0050896 response to stimulus	-8.26508	42.5807	15.6502	30211	129	33	6	18.1818	6.71408	3162|4609|4780|5728|5743|7157	HMOX1|MYC|NFE2L2|PTEN|PTGS2|TP53	-6.02173	0	13	0	0	-11.2117	94.7053
1	-8.10792	GO:0036294	M1	1	0	GO Biological Processes	19	cellular response to decreased oxygen levels	19_GO:0050896 response to stimulus	-8.10792	40.0942	15.1658	30211	137	33	6	18.1818	6.71408	3162|4609|4780|5728|5743|7157	HMOX1|MYC|NFE2L2|PTEN|PTGS2|TP53	-5.87914	0	13	0	0	-11.2117	94.7053
1	-7.83737	GO:0071453	M1	1	0	GO Biological Processes	19	cellular response to oxygen levels	19_GO:0050896 response to stimulus	-7.83737	36.1376	14.3613	30211	152	33	6	18.1818	6.71408	3162|4609|4780|5728|5743|7157	HMOX1|MYC|NFE2L2|PTEN|PTGS2|TP53	-5.66255	0	13	0	0	-11.2117	94.7053
1	-7.01464	GO:0050679	M1	1	0	GO Biological Processes	19	positive regulation of epithelial cell proliferation	19_GO:0048518 positive regulation of biological process	-7.01464	26.2819	12.1281	30211	209	33	6	18.1818	6.71408	1956|3162|3725|4609|7124|7128	EGFR|HMOX1|JUN|MYC|TNF|TNFAIP3	-4.97909	0	13	0	0	-11.2117	94.7053
1	-6.92876	GO:0045786	M1	1	0	GO Biological Processes	19	negative regulation of cell cycle	19_GO:0048519 negative regulation of biological process	-6.92876	17.5093	10.508	30211	366	33	7	21.2121	7.11647	5728|5743|5925|7040|7124|7128|7157	PTEN|PTGS2|RB1|TGFB1|TNF|TNFAIP3|TP53	-4.90825	0	13	0	0	-11.2117	94.7053
1	-6.25167	GO:0031099	M1	1	0	GO Biological Processes	19	regeneration	19_GO:0032502 developmental process	-6.25167	30.9285	12.0694	30211	148	33	5	15.1515	6.24156	301|3162|3725|4609|7124	ANXA1|HMOX1|JUN|MYC|TNF	-4.34487	0	13	0	0	-11.2117	94.7053
1	-5.7343	GO:0030336	M1	1	0	GO Biological Processes	19	negative regulation of cell migration	19_GO:0040011 locomotion	-5.7343	15.8755	9.20268	30211	346	33	6	18.1818	6.71408	3162|4780|5728|7040|7124|114757	HMOX1|NFE2L2|PTEN|TGFB1|TNF|CYGB	-3.89282	0	13	0	0	-11.2117	94.7053
1	-5.62872	GO:1904705	M1	1	0	GO Biological Processes	19	regulation of vascular associated smooth muscle cell proliferation	19_GO:0050789 regulation of biological process	-5.62872	42.5807	12.7692	30211	86	33	4	12.1212	5.68144	3162|3725|5728|7124	HMOX1|JUN|PTEN|TNF	-3.8074	0	13	0	0	-11.2117	94.7053
1	-5.62794	GO:2000146	M1	1	0	GO Biological Processes	19	negative regulation of cell motility	19_GO:0040011 locomotion	-5.62794	15.2158	8.98546	30211	361	33	6	18.1818	6.71408	3162|4780|5728|7040|7124|114757	HMOX1|NFE2L2|PTEN|TGFB1|TNF|CYGB	-3.8074	0	13	0	0	-11.2117	94.7053
1	-5.5731	GO:0051271	M1	1	0	GO Biological Processes	19	negative regulation of cellular component movement	19_GO:0051179 localization	-5.5731	14.8859	8.87486	30211	369	33	6	18.1818	6.71408	3162|4780|5728|7040|7124|114757	HMOX1|NFE2L2|PTEN|TGFB1|TNF|CYGB	-3.76185	0	13	0	0	-11.2117	94.7053
1	-5.3969	GO:0040013	M1	1	0	GO Biological Processes	19	negative regulation of locomotion	19_GO:0040011 locomotion	-5.3969	13.871	8.52568	30211	396	33	6	18.1818	6.71408	3162|4780|5728|7040|7124|114757	HMOX1|NFE2L2|PTEN|TGFB1|TNF|CYGB	-3.60875	0	13	0	0	-11.2117	94.7053
1	-5.37107	GO:0097421	M1	1	0	GO Biological Processes	19	liver regeneration	19_GO:0032502 developmental process	-5.37107	94.7053	16.6946	30211	29	33	3	9.09091	5.00438	3162|4609|7124	HMOX1|MYC|TNF	-3.58636	0	13	0	0	-11.2117	94.7053
1	-4.30519	GO:0031100	M1	1	0	GO Biological Processes	19	animal organ regeneration	19_GO:0032502 developmental process	-4.30519	42.2531	11.01	30211	65	33	3	9.09091	5.00438	3162|4609|7124	HMOX1|MYC|TNF	-2.70056	0	13	0	0	-11.2117	94.7053
1	-3.01618	GO:0001936	M1	1	0	GO Biological Processes	19	regulation of endothelial cell proliferation	19_GO:0050789 regulation of biological process	-3.01618	15.4295	6.38483	30211	178	33	3	9.09091	5.00438	3162|3725|7124	HMOX1|JUN|TNF	-1.60214	0	13	0	0	-11.2117	94.7053
1	-10.2144	GO:0032355	M1	1	0	GO Biological Processes	19	response to estradiol	19_GO:0050896 response to stimulus	-10.2144	52.1008	18.7789	30211	123	33	7	21.2121	7.11647	301|841|1728|1956|4609|5743|7040	ANXA1|CASP8|NQO1|EGFR|MYC|PTGS2|TGFB1	-7.78241	0	14	1	1	-10.2144	171.653
1	-6.75959	GO:0002761	M1	1	0	GO Biological Processes	19	regulation of myeloid leukocyte differentiation	19_GO:0002376 immune system process	-6.75959	39.1233	13.6625	30211	117	33	5	15.1515	6.24156	841|4609|5925|7040|7124	CASP8|MYC|RB1|TGFB1|TNF	-4.77042	0	14	0	0	-10.2144	171.653
1	-6.68668	GO:0051101	M1	1	0	GO Biological Processes	19	regulation of DNA binding	19_GO:0065007 biological regulation	-6.68668	37.83	13.4236	30211	121	33	5	15.1515	6.24156	3162|3725|4609|5925|7040	HMOX1|JUN|MYC|RB1|TGFB1	-4.70297	0	14	0	0	-10.2144	171.653
1	-6.41262	GO:0002763	M1	1	0	GO Biological Processes	19	positive regulation of myeloid leukocyte differentiation	19_GO:0002376 immune system process	-6.41262	66.5807	16.0975	30211	55	33	4	12.1212	5.68144	841|5925|7040|7124	CASP8|RB1|TGFB1|TNF	-4.48247	0	14	0	0	-10.2144	171.653
1	-6.24123	GO:1902105	M1	1	0	GO Biological Processes	19	regulation of leukocyte differentiation	19_GO:0002376 immune system process	-6.24123	19.4096	10.2893	30211	283	33	6	18.1818	6.71408	301|841|4609|5925|7040|7124	ANXA1|CASP8|MYC|RB1|TGFB1|TNF	-4.3367	0	14	0	0	-10.2144	171.653
1	-6.18144	GO:0045651	M1	1	0	GO Biological Processes	19	positive regulation of macrophage differentiation	19_GO:0002376 immune system process	-6.18144	171.653	22.5785	30211	16	33	3	9.09091	5.00438	841|5925|7040	CASP8|RB1|TGFB1	-4.28142	0	14	0	0	-10.2144	171.653
1	-6.12479	GO:1902107	M1	1	0	GO Biological Processes	19	positive regulation of leukocyte differentiation	19_GO:0002376 immune system process	-6.12479	29.1556	11.6963	30211	157	33	5	15.1515	6.24156	301|841|5925|7040|7124	ANXA1|CASP8|RB1|TGFB1|TNF	-4.23362	0	14	0	0	-10.2144	171.653
1	-6.12479	GO:1903708	M1	1	0	GO Biological Processes	19	positive regulation of hemopoiesis	19_GO:0002376 immune system process	-6.12479	29.1556	11.6963	30211	157	33	5	15.1515	6.24156	301|841|5925|7040|7124	ANXA1|CASP8|RB1|TGFB1|TNF	-4.23362	0	14	0	0	-10.2144	171.653
1	-5.62601	GO:0045649	M1	1	0	GO Biological Processes	19	regulation of macrophage differentiation	19_GO:0002376 immune system process	-5.62601	114.436	18.3837	30211	24	33	3	9.09091	5.00438	841|5925|7040	CASP8|RB1|TGFB1	-3.8074	0	14	0	0	-10.2144	171.653
1	-5.59352	GO:0051098	M1	1	0	GO Biological Processes	19	regulation of binding	19_GO:0065007 biological regulation	-5.59352	15.0079	8.91592	30211	366	33	6	18.1818	6.71408	2932|3162|3725|4609|5925|7040	GSK3B|HMOX1|JUN|MYC|RB1|TGFB1	-3.7786	0	14	0	0	-10.2144	171.653
1	-5.55959	GO:1903706	M1	1	0	GO Biological Processes	19	regulation of hemopoiesis	19_GO:0002376 immune system process	-5.55959	14.8057	8.84775	30211	371	33	6	18.1818	6.71408	301|841|4609|5925|7040|7124	ANXA1|CASP8|MYC|RB1|TGFB1|TNF	-3.75557	0	14	0	0	-10.2144	171.653
1	-5.5242	GO:0045637	M1	1	0	GO Biological Processes	19	regulation of myeloid cell differentiation	19_GO:0002376 immune system process	-5.5242	22.0068	10.053	30211	208	33	5	15.1515	6.24156	841|4609|5925|7040|7124	CASP8|MYC|RB1|TGFB1|TNF	-3.72554	0	14	0	0	-10.2144	171.653
1	-5.38443	GO:0045639	M1	1	0	GO Biological Processes	19	positive regulation of myeloid cell differentiation	19_GO:0002376 immune system process	-5.38443	36.9893	11.8606	30211	99	33	4	12.1212	5.68144	841|5925|7040|7124	CASP8|RB1|TGFB1|TNF	-3.598	0	14	0	0	-10.2144	171.653
1	-5.27483	GO:0097305	M1	1	0	GO Biological Processes	19	response to alcohol	19_GO:0050896 response to stimulus	-5.27483	19.5616	9.42578	30211	234	33	5	15.1515	6.24156	841|1728|4609|7040|7124	CASP8|NQO1|MYC|TGFB1|TNF	-3.51996	0	14	0	0	-10.2144	171.653
1	-5.06693	GO:0045471	M1	1	0	GO Biological Processes	19	response to ethanol	19_GO:0050896 response to stimulus	-5.06693	30.7726	10.761	30211	119	33	4	12.1212	5.68144	841|1728|4609|7124	CASP8|NQO1|MYC|TNF	-3.34892	0	14	0	0	-10.2144	171.653
1	-4.47662	GO:0043388	M1	1	0	GO Biological Processes	19	positive regulation of DNA binding	19_GO:0065007 biological regulation	-4.47662	48.1834	11.7907	30211	57	33	3	9.09091	5.00438	4609|5925|7040	MYC|RB1|TGFB1	-2.84749	0	14	0	0	-10.2144	171.653
1	-4.4477	GO:0051099	M1	1	0	GO Biological Processes	19	positive regulation of binding	19_GO:0065007 biological regulation	-4.4477	21.4149	8.85282	30211	171	33	4	12.1212	5.68144	2932|4609|5925|7040	GSK3B|MYC|RB1|TGFB1	-2.82097	0	14	0	0	-10.2144	171.653
1	-3.23998	GO:0032869	M1	1	0	GO Biological Processes	19	cellular response to insulin stimulus	19_GO:0050896 response to stimulus	-3.23998	18.4326	7.05396	30211	149	33	3	9.09091	5.00438	2932|4609|5925	GSK3B|MYC|RB1	-1.80265	0	14	0	0	-10.2144	171.653
1	-2.82784	GO:0032868	M1	1	0	GO Biological Processes	19	response to insulin	19_GO:0050896 response to stimulus	-2.82784	13.2679	5.8567	30211	207	33	3	9.09091	5.00438	2932|4609|5925	GSK3B|MYC|RB1	-1.43029	0	14	0	0	-10.2144	171.653
1	-2.79236	GO:0033044	M1	1	0	GO Biological Processes	19	regulation of chromosome organization	19_GO:0050789 regulation of biological process	-2.79236	12.8942	5.76055	30211	213	33	3	9.09091	5.00438	4609|5594|5925	MYC|MAPK1|RB1	-1.39692	0	14	0	0	-10.2144	171.653
1	-10.0474	GO:0002520	M1	1	0	GO Biological Processes	19	immune system development	19_GO:0002376 immune system process	-10.0474	14.7443	12.0144	30211	683	33	11	33.3333	8.2061	301|841|2194|3725|5594|5925|7040|7042|7124|7128|7157	ANXA1|CASP8|FASN|JUN|MAPK1|RB1|TGFB1|TGFB2|TNF|TNFAIP3|TP53	-7.63776	0	15	1	1	-10.0474	15.473
1	-8.97489	GO:0048534	M1	1	0	GO Biological Processes	19	hematopoietic or lymphoid organ development	19_GO:0002376 immune system process	-8.97489	14.2377	11.22	30211	643	33	10	30.303	8.00006	301|841|2194|3725|5594|5925|7040|7042|7124|7157	ANXA1|CASP8|FASN|JUN|MAPK1|RB1|TGFB1|TGFB2|TNF|TP53	-6.67355	0	15	0	0	-10.0474	15.473
1	-7.9801	GO:0030097	M1	1	0	GO Biological Processes	19	hemopoiesis	19_GO:0002376 immune system process	-7.9801	13.871	10.4766	30211	594	33	9	27.2727	7.75275	301|841|2194|3725|5925|7040|7042|7124|7157	ANXA1|CASP8|FASN|JUN|RB1|TGFB1|TGFB2|TNF|TP53	-5.77247	0	15	0	0	-10.0474	15.473
1	-7.02057	GO:0007507	M1	1	0	GO Biological Processes	19	heart development	19_GO:0032502 developmental process	-7.02057	13.5127	9.72044	30211	542	33	8	24.2424	7.46009	841|3725|5594|5728|5925|7040|7042|7157	CASP8|JUN|MAPK1|PTEN|RB1|TGFB1|TGFB2|TP53	-4.98196	0	15	0	0	-10.0474	15.473
1	-5.66991	GO:0002521	M1	1	0	GO Biological Processes	19	leukocyte differentiation	19_GO:0002376 immune system process	-5.66991	15.473	9.07076	30211	355	33	6	18.1818	6.71408	301|841|2194|3725|7124|7157	ANXA1|CASP8|FASN|JUN|TNF|TP53	-3.83426	0	15	0	0	-10.0474	15.473
1	-3.55209	GO:1903131	M1	1	0	GO Biological Processes	19	mononuclear cell differentiation	19_GO:0002376 immune system process	-3.55209	12.5409	6.55306	30211	292	33	4	12.1212	5.68144	301|2194|3725|7157	ANXA1|FASN|JUN|TP53	-2.07353	0	15	0	0	-10.0474	15.473
1	-2.57038	GO:0042110	M1	1	0	GO Biological Processes	19	T cell activation	19_GO:0002376 immune system process	-2.57038	10.7704	5.18117	30211	255	33	3	9.09091	5.00438	301|841|7157	ANXA1|CASP8|TP53	-1.19278	0	15	0	0	-10.0474	15.473
1	-2.00808	GO:0046649	M1	1	0	GO Biological Processes	19	lymphocyte activation	19_GO:0002376 immune system process	-2.00808	6.74805	3.86071	30211	407	33	3	9.09091	5.00438	301|841|7157	ANXA1|CASP8|TP53	-0.664723	0	15	0	0	-10.0474	15.473
1	-10.0272	GO:0043408	M1	1	0	GO Biological Processes	19	regulation of MAPK cascade	19_GO:0023052 signaling	-10.0272	14.6798	11.9849	30211	686	33	11	33.3333	8.2061	246|1956|2950|3725|4609|5594|5728|7040|7042|7124|7345	ALOX15|EGFR|GSTP1|JUN|MYC|MAPK1|PTEN|TGFB1|TGFB2|TNF|UCHL1	-7.62473	0	16	1	1	-10.0272	228.871
1	-7.85318	GO:0097190	M1	1	0	GO Biological Processes	19	apoptotic signaling pathway	19_GO:0023052 signaling	-7.85318	23.9119	12.4586	30211	268	33	7	21.2121	7.11647	841|2932|3162|7040|7042|7124|7157	CASP8|GSK3B|HMOX1|TGFB1|TGFB2|TNF|TP53	-5.66968	0	16	0	0	-10.0272	228.871
1	-7.83334	GO:1903798	M1	1	0	GO Biological Processes	19	regulation of production of miRNAs involved in gene silencing by miRNA	19_GO:0048519 negative regulation of biological process	-7.83334	146.478	24.063	30211	25	33	4	12.1212	5.68144	1956|7040|7124|7157	EGFR|TGFB1|TNF|TP53	-5.66255	0	16	0	0	-10.0272	228.871
1	-7.76113	GO:0070920	M1	1	0	GO Biological Processes	19	regulation of production of small RNA involved in gene silencing by RNA	19_GO:0048519 negative regulation of biological process	-7.76113	140.844	23.5896	30211	26	33	4	12.1212	5.68144	1956|7040|7124|7157	EGFR|TGFB1|TNF|TP53	-5.59449	0	16	0	0	-10.0272	228.871
1	-7.69182	GO:0002719	M1	1	0	GO Biological Processes	19	negative regulation of cytokine production involved in immune response	19_GO:0002376 immune system process	-7.69182	135.627	23.1427	30211	27	33	4	12.1212	5.68144	3162|7040|7042|7124	HMOX1|TGFB1|TGFB2|TNF	-5.53742	0	16	0	0	-10.0272	228.871
1	-7.56109	GO:0007435	M1	1	0	GO Biological Processes	19	salivary gland morphogenesis	19_GO:0032502 developmental process	-7.56109	126.274	22.3189	30211	29	33	4	12.1212	5.68144	1956|7040|7042|7124	EGFR|TGFB1|TGFB2|TNF	-5.41858	0	16	0	0	-10.0272	228.871
1	-7.43961	GO:0007431	M1	1	0	GO Biological Processes	19	salivary gland development	19_GO:0032502 developmental process	-7.43961	118.127	21.5757	30211	31	33	4	12.1212	5.68144	1956|7040|7042|7124	EGFR|TGFB1|TGFB2|TNF	-5.33456	0	16	0	0	-10.0272	228.871
1	-7.41017	GO:0070372	M1	1	0	GO Biological Processes	19	regulation of ERK1 and ERK2 cascade	19_GO:0023052 signaling	-7.41017	20.6058	11.4925	30211	311	33	7	21.2121	7.11647	246|1956|2950|3725|5728|7040|7124	ALOX15|EGFR|GSTP1|JUN|PTEN|TGFB1|TNF	-5.3087	0	16	0	0	-10.0272	228.871
1	-7.33172	GO:0097191	M1	1	0	GO Biological Processes	19	extrinsic apoptotic signaling pathway	19_GO:0023052 signaling	-7.33172	50.8603	15.6649	30211	90	33	5	15.1515	6.24156	841|2932|7040|7042|7124	CASP8|GSK3B|TGFB1|TGFB2|TNF	-5.2408	0	16	0	0	-10.0272	228.871
1	-7.07163	GO:0002701	M1	1	0	GO Biological Processes	19	negative regulation of production of molecular mediator of immune response	19_GO:0002376 immune system process	-7.07163	96.3668	19.4521	30211	38	33	4	12.1212	5.68144	3162|7040|7042|7124	HMOX1|TGFB1|TGFB2|TNF	-5.02992	0	16	0	0	-10.0272	228.871
1	-6.97796	GO:1903530	M1	1	0	GO Biological Processes	19	regulation of secretion by cell	19_GO:0051179 localization	-6.97796	13.3404	9.64944	30211	549	33	8	24.2424	7.46009	301|2182|2932|3162|6622|7040|7042|7124	ANXA1|ACSL4|GSK3B|HMOX1|SNCA|TGFB1|TGFB2|TNF	-4.94849	0	16	0	0	-10.0272	228.871
1	-6.88306	GO:0070374	M1	1	0	GO Biological Processes	19	positive regulation of ERK1 and ERK2 cascade	19_GO:0023052 signaling	-6.88306	24.9678	11.7986	30211	220	33	6	18.1818	6.71408	246|1956|3725|5728|7040|7124	ALOX15|EGFR|JUN|PTEN|TGFB1|TNF	-4.87708	0	16	0	0	-10.0272	228.871
1	-6.87395	GO:0014066	M1	1	0	GO Biological Processes	19	regulation of phosphatidylinositol 3-kinase signaling	19_GO:0023052 signaling	-6.87395	41.2381	14.0444	30211	111	33	5	15.1515	6.24156	1956|4734|5728|7042|7124	EGFR|NEDD4|PTEN|TGFB2|TNF	-4.87082	0	16	0	0	-10.0272	228.871
1	-6.85446	GO:0002698	M1	1	0	GO Biological Processes	19	negative regulation of immune effector process	19_GO:0002376 immune system process	-6.85446	40.8699	13.9786	30211	112	33	5	15.1515	6.24156	301|3162|7040|7042|7124	ANXA1|HMOX1|TGFB1|TGFB2|TNF	-4.85415	0	16	0	0	-10.0272	228.871
1	-6.85009	GO:0035272	M1	1	0	GO Biological Processes	19	exocrine system development	19_GO:0032502 developmental process	-6.85009	85.1614	18.2625	30211	43	33	4	12.1212	5.68144	1956|7040|7042|7124	EGFR|TGFB1|TGFB2|TNF	-4.85259	0	16	0	0	-10.0272	228.871
1	-6.65109	GO:0051046	M1	1	0	GO Biological Processes	19	regulation of secretion	19_GO:0051179 localization	-6.65109	12.0856	9.11592	30211	606	33	8	24.2424	7.46009	301|2182|2932|3162|6622|7040|7042|7124	ANXA1|ACSL4|GSK3B|HMOX1|SNCA|TGFB1|TGFB2|TNF	-4.67544	0	16	0	0	-10.0272	228.871
1	-6.61736	GO:0060964	M1	1	0	GO Biological Processes	19	regulation of gene silencing by miRNA	19_GO:0048519 negative regulation of biological process	-6.61736	74.7335	17.0813	30211	49	33	4	12.1212	5.68144	1956|7040|7124|7157	EGFR|TGFB1|TNF|TP53	-4.64701	0	16	0	0	-10.0272	228.871
1	-6.58592	GO:1903800	M1	1	0	GO Biological Processes	19	positive regulation of production of miRNAs involved in gene silencing by miRNA	19_GO:0048519 negative regulation of biological process	-6.58592	228.871	26.1078	30211	12	33	3	9.09091	5.00438	1956|7040|7157	EGFR|TGFB1|TP53	-4.6208	0	16	0	0	-10.0272	228.871
1	-6.51191	GO:0060147	M1	1	0	GO Biological Processes	19	regulation of posttranscriptional gene silencing	19_GO:0048519 negative regulation of biological process	-6.51191	70.4219	16.5683	30211	52	33	4	12.1212	5.68144	1956|7040|7124|7157	EGFR|TGFB1|TNF|TP53	-4.55961	0	16	0	0	-10.0272	228.871
1	-6.47817	GO:0060966	M1	1	0	GO Biological Processes	19	regulation of gene silencing by RNA	19_GO:0048519 negative regulation of biological process	-6.47817	69.0932	16.4069	30211	53	33	4	12.1212	5.68144	1956|7040|7124|7157	EGFR|TGFB1|TNF|TP53	-4.53337	0	16	0	0	-10.0272	228.871
1	-6.34962	GO:1903829	M1	1	0	GO Biological Processes	19	positive regulation of protein localization	19_GO:0051179 localization	-6.34962	14.3686	9.40562	30211	446	33	7	21.2121	7.11647	1956|2182|2932|5743|7040|7042|7124	EGFR|ACSL4|GSK3B|PTGS2|TGFB1|TGFB2|TNF	-4.42896	0	16	0	0	-10.0272	228.871
1	-6.2713	GO:1903799	M1	1	0	GO Biological Processes	19	negative regulation of production of miRNAs involved in gene silencing by miRNA	19_GO:0048519 negative regulation of biological process	-6.2713	183.097	23.3271	30211	15	33	3	9.09091	5.00438	7040|7124|7157	TGFB1|TNF|TP53	-4.35993	0	16	0	0	-10.0272	228.871
1	-6.15328	GO:0051222	M1	1	0	GO Biological Processes	19	positive regulation of protein transport	19_GO:0051179 localization	-6.15328	18.7471	10.0945	30211	293	33	6	18.1818	6.71408	2182|2932|5743|7040|7042|7124	ACSL4|GSK3B|PTGS2|TGFB1|TGFB2|TNF	-4.25771	0	16	0	0	-10.0272	228.871
1	-6.07625	GO:0043410	M1	1	0	GO Biological Processes	19	positive regulation of MAPK cascade	19_GO:0023052 signaling	-6.07625	13.0784	8.91377	30211	490	33	7	21.2121	7.11647	246|1956|3725|5728|7040|7042|7124	ALOX15|EGFR|JUN|PTEN|TGFB1|TGFB2|TNF	-4.19162	0	16	0	0	-10.0272	228.871
1	-6.01892	GO:1904951	M1	1	0	GO Biological Processes	19	positive regulation of establishment of protein localization	19_GO:0051179 localization	-6.01892	17.7764	9.80201	30211	309	33	6	18.1818	6.71408	2182|2932|5743|7040|7042|7124	ACSL4|GSK3B|PTGS2|TGFB1|TGFB2|TNF	-4.14284	0	16	0	0	-10.0272	228.871
1	-5.91502	GO:0009895	M1	1	0	GO Biological Processes	19	negative regulation of catabolic process	19_GO:0048519 negative regulation of biological process	-5.91502	17.0587	9.58011	30211	322	33	6	18.1818	6.71408	1956|3162|5970|6622|7124|7157	EGFR|HMOX1|RELA|SNCA|TNF|TP53	-4.04525	0	16	0	0	-10.0272	228.871
1	-5.79676	GO:0043405	M1	1	0	GO Biological Processes	19	regulation of MAP kinase activity	19_GO:0008152 metabolic process	-5.79676	25.0132	10.7746	30211	183	33	5	15.1515	6.24156	1956|2950|7040|7124|7345	EGFR|GSTP1|TGFB1|TNF|UCHL1	-3.94539	0	16	0	0	-10.0272	228.871
1	-5.74405	GO:0060965	M1	1	0	GO Biological Processes	19	negative regulation of gene silencing by miRNA	19_GO:0048519 negative regulation of biological process	-5.74405	124.839	19.2146	30211	22	33	3	9.09091	5.00438	7040|7124|7157	TGFB1|TNF|TP53	-3.89583	0	16	0	0	-10.0272	228.871
1	-5.62601	GO:0060149	M1	1	0	GO Biological Processes	19	negative regulation of posttranscriptional gene silencing	19_GO:0048519 negative regulation of biological process	-5.62601	114.436	18.3837	30211	24	33	3	9.09091	5.00438	7040|7124|7157	TGFB1|TNF|TP53	-3.8074	0	16	0	0	-10.0272	228.871
1	-5.62601	GO:0060967	M1	1	0	GO Biological Processes	19	negative regulation of gene silencing by RNA	19_GO:0048519 negative regulation of biological process	-5.62601	114.436	18.3837	30211	24	33	3	9.09091	5.00438	7040|7124|7157	TGFB1|TNF|TP53	-3.8074	0	16	0	0	-10.0272	228.871
1	-5.40201	GO:0002718	M1	1	0	GO Biological Processes	19	regulation of cytokine production involved in immune response	19_GO:0002376 immune system process	-5.40201	37.3667	11.9241	30211	98	33	4	12.1212	5.68144	3162|7040|7042|7124	HMOX1|TGFB1|TGFB2|TNF	-3.61211	0	16	0	0	-10.0272	228.871
1	-5.34982	GO:0022612	M1	1	0	GO Biological Processes	19	gland morphogenesis	19_GO:0032502 developmental process	-5.34982	36.2568	11.7364	30211	101	33	4	12.1212	5.68144	1956|7040|7042|7124	EGFR|TGFB1|TGFB2|TNF	-3.56852	0	16	0	0	-10.0272	228.871
1	-5.32564	GO:2000637	M1	1	0	GO Biological Processes	19	positive regulation of gene silencing by miRNA	19_GO:0048519 negative regulation of biological process	-5.32564	91.5485	16.4082	30211	30	33	3	9.09091	5.00438	1956|7040|7157	EGFR|TGFB1|TP53	-3.55444	0	16	0	0	-10.0272	228.871
1	-5.28175	GO:0060148	M1	1	0	GO Biological Processes	19	positive regulation of posttranscriptional gene silencing	19_GO:0048519 negative regulation of biological process	-5.28175	88.5953	16.1358	30211	31	33	3	9.09091	5.00438	1956|7040|7157	EGFR|TGFB1|TP53	-3.52391	0	16	0	0	-10.0272	228.871
1	-5.046	GO:0010923	M1	1	0	GO Biological Processes	19	negative regulation of phosphatase activity	19_GO:0048519 negative regulation of biological process	-5.046	74.2285	14.7384	30211	37	33	3	9.09091	5.00438	2932|7042|7124	GSK3B|TGFB2|TNF	-3.33093	0	16	0	0	-10.0272	228.871
1	-5.046	GO:0031663	M1	1	0	GO Biological Processes	19	lipopolysaccharide-mediated signaling pathway	19_GO:0044419 biological process involved in interspecies interaction between organisms	-5.046	74.2285	14.7384	30211	37	33	3	9.09091	5.00438	5594|7040|7124	MAPK1|TGFB1|TNF	-3.33093	0	16	0	0	-10.0272	228.871
1	-5.01061	GO:0043491	M1	1	0	GO Biological Processes	19	protein kinase B signaling	19_GO:0023052 signaling	-5.01061	72.2751	14.5381	30211	38	33	3	9.09091	5.00438	5728|7040|7124	PTEN|TGFB1|TNF	-3.297	0	16	0	0	-10.0272	228.871
1	-4.92836	GO:0001101	M1	1	0	GO Biological Processes	19	response to acid chemical	19_GO:0050896 response to stimulus	-4.92836	28.3871	10.308	30211	129	33	4	12.1212	5.68144	1728|1956|4609|7124	NQO1|EGFR|MYC|TNF	-3.22197	0	16	0	0	-10.0272	228.871
1	-4.91512	GO:0035303	M1	1	0	GO Biological Processes	19	regulation of dephosphorylation	19_GO:0008152 metabolic process	-4.91512	28.1688	10.2656	30211	130	33	4	12.1212	5.68144	2932|7040|7042|7124	GSK3B|TGFB1|TGFB2|TNF	-3.21017	0	16	0	0	-10.0272	228.871
1	-4.84526	GO:0051223	M1	1	0	GO Biological Processes	19	regulation of protein transport	19_GO:0051179 localization	-4.84526	11.0968	7.48993	30211	495	33	6	18.1818	6.71408	2182|2932|5743|7040|7042|7124	ACSL4|GSK3B|PTGS2|TGFB1|TGFB2|TNF	-3.15019	0	16	0	0	-10.0272	228.871
1	-4.72974	GO:0002673	M1	1	0	GO Biological Processes	19	regulation of acute inflammatory response	19_GO:0050896 response to stimulus	-4.72974	58.4352	13.0308	30211	47	33	3	9.09091	5.00438	2950|5743|7124	GSTP1|PTGS2|TNF	-3.04977	0	16	0	0	-10.0272	228.871
1	-4.7246	GO:0070201	M1	1	0	GO Biological Processes	19	regulation of establishment of protein localization	19_GO:0051179 localization	-4.7246	10.5633	7.27417	30211	520	33	6	18.1818	6.71408	2182|2932|5743|7040|7042|7124	ACSL4|GSK3B|PTGS2|TGFB1|TGFB2|TNF	-3.04598	0	16	0	0	-10.0272	228.871
1	-4.70204	GO:0035305	M1	1	0	GO Biological Processes	19	negative regulation of dephosphorylation	19_GO:0048519 negative regulation of biological process	-4.70204	57.2178	12.8897	30211	48	33	3	9.09091	5.00438	2932|7042|7124	GSK3B|TGFB2|TNF	-3.02875	0	16	0	0	-10.0272	228.871
1	-4.48785	GO:0002700	M1	1	0	GO Biological Processes	19	regulation of production of molecular mediator of immune response	19_GO:0002376 immune system process	-4.48785	21.9278	8.96788	30211	167	33	4	12.1212	5.68144	3162|7040|7042|7124	HMOX1|TGFB1|TGFB2|TNF	-2.85269	0	16	0	0	-10.0272	228.871
1	-4.47662	GO:0032768	M1	1	0	GO Biological Processes	19	regulation of monooxygenase activity	19_GO:0065007 biological regulation	-4.47662	48.1834	11.7907	30211	57	33	3	9.09091	5.00438	1956|6622|7124	EGFR|SNCA|TNF	-2.84749	0	16	0	0	-10.0272	228.871
1	-4.41571	GO:0002697	M1	1	0	GO Biological Processes	19	regulation of immune effector process	19_GO:0002376 immune system process	-4.41571	12.9672	7.47889	30211	353	33	5	15.1515	6.24156	301|3162|7040|7042|7124	ANXA1|HMOX1|TGFB1|TGFB2|TNF	-2.79372	0	16	0	0	-10.0272	228.871
1	-4.29633	GO:0051896	M1	1	0	GO Biological Processes	19	regulation of protein kinase B signaling	19_GO:0023052 signaling	-4.29633	19.5826	8.42906	30211	187	33	4	12.1212	5.68144	1956|5728|7040|7124	EGFR|PTEN|TGFB1|TNF	-2.69283	0	16	0	0	-10.0272	228.871
1	-4.26574	GO:1901224	M1	1	0	GO Biological Processes	19	positive regulation of NIK/NF-kappaB signaling	19_GO:0023052 signaling	-4.26574	40.9919	10.8367	30211	67	33	3	9.09091	5.00438	1956|5970|7124	EGFR|RELA|TNF	-2.66897	0	16	0	0	-10.0272	228.871
1	-4.19481	GO:0045860	M1	1	0	GO Biological Processes	19	positive regulation of protein kinase activity	19_GO:0048518 positive regulation of biological process	-4.19481	11.6474	7.02566	30211	393	33	5	15.1515	6.24156	1956|6622|7040|7042|7124	EGFR|SNCA|TGFB1|TGFB2|TNF	-2.60686	0	16	0	0	-10.0272	228.871
1	-4.11702	GO:0071902	M1	1	0	GO Biological Processes	19	positive regulation of protein serine/threonine kinase activity	19_GO:0048518 positive regulation of biological process	-4.11702	17.6055	7.94672	30211	208	33	4	12.1212	5.68144	1956|6622|7040|7124	EGFR|SNCA|TGFB1|TNF	-2.54197	0	16	0	0	-10.0272	228.871
1	-4.05194	GO:0014068	M1	1	0	GO Biological Processes	19	positive regulation of phosphatidylinositol 3-kinase signaling	19_GO:0023052 signaling	-4.05194	34.7652	9.93703	30211	79	33	3	9.09091	5.00438	4734|7042|7124	NEDD4|TGFB2|TNF	-2.4925	0	16	0	0	-10.0272	228.871
1	-3.97259	GO:0010921	M1	1	0	GO Biological Processes	19	regulation of phosphatase activity	19_GO:0008152 metabolic process	-3.97259	32.6959	9.61948	30211	84	33	3	9.09091	5.00438	2932|7042|7124	GSK3B|TGFB2|TNF	-2.42325	0	16	0	0	-10.0272	228.871
1	-3.95731	GO:0071229	M1	1	0	GO Biological Processes	19	cellular response to acid chemical	19_GO:0050896 response to stimulus	-3.95731	32.3112	9.5593	30211	85	33	3	9.09091	5.00438	1956|4609|7124	EGFR|MYC|TNF	-2.4149	0	16	0	0	-10.0272	228.871
1	-3.86935	GO:0035304	M1	1	0	GO Biological Processes	19	regulation of protein dephosphorylation	19_GO:0008152 metabolic process	-3.86935	30.1808	9.21887	30211	91	33	3	9.09091	5.00438	2932|7040|7124	GSK3B|TGFB1|TNF	-2.33666	0	16	0	0	-10.0272	228.871
1	-3.82276	GO:0002699	M1	1	0	GO Biological Processes	19	positive regulation of immune effector process	19_GO:0002376 immune system process	-3.82276	14.7659	7.19821	30211	248	33	4	12.1212	5.68144	301|3162|7040|7124	ANXA1|HMOX1|TGFB1|TNF	-2.29674	0	16	0	0	-10.0272	228.871
1	-3.81749	GO:0033674	M1	1	0	GO Biological Processes	19	positive regulation of kinase activity	19_GO:0048518 positive regulation of biological process	-3.81749	9.67743	6.29003	30211	473	33	5	15.1515	6.24156	1956|6622|7040|7042|7124	EGFR|SNCA|TGFB1|TGFB2|TNF	-2.29336	0	16	0	0	-10.0272	228.871
1	-3.79613	GO:0050708	M1	1	0	GO Biological Processes	19	regulation of protein secretion	19_GO:0051179 localization	-3.79613	14.5315	7.13296	30211	252	33	4	12.1212	5.68144	2182|7040|7042|7124	ACSL4|TGFB1|TGFB2|TNF	-2.27481	0	16	0	0	-10.0272	228.871
1	-3.7872	GO:0032642	M1	1	0	GO Biological Processes	19	regulation of chemokine production	19_GO:0032501 multicellular organismal process	-3.7872	28.314	8.90991	30211	97	33	3	9.09091	5.00438	2950|3162|7124	GSTP1|HMOX1|TNF	-2.26961	0	16	0	0	-10.0272	228.871
1	-3.7378	GO:0050730	M1	1	0	GO Biological Processes	19	regulation of peptidyl-tyrosine phosphorylation	19_GO:0008152 metabolic process	-3.7378	14.0304	6.99145	30211	261	33	4	12.1212	5.68144	1956|7040|7124|7157	EGFR|TGFB1|TNF|TP53	-2.23302	0	16	0	0	-10.0272	228.871
1	-3.71014	GO:1903076	M1	1	0	GO Biological Processes	19	regulation of protein localization to plasma membrane	19_GO:0051179 localization	-3.71014	26.6646	8.62779	30211	103	33	3	9.09091	5.00438	1956|7040|7124	EGFR|TGFB1|TNF	-2.21516	0	16	0	0	-10.0272	228.871
1	-3.66131	GO:0051341	M1	1	0	GO Biological Processes	19	regulation of oxidoreductase activity	19_GO:0065007 biological regulation	-3.66131	25.6678	8.45274	30211	107	33	3	9.09091	5.00438	1956|6622|7124	EGFR|SNCA|TNF	-2.16984	0	16	0	0	-10.0272	228.871
1	-3.62592	GO:1901222	M1	1	0	GO Biological Processes	19	regulation of NIK/NF-kappaB signaling	19_GO:0023052 signaling	-3.62592	24.9678	8.32761	30211	110	33	3	9.09091	5.00438	1956|5970|7124	EGFR|RELA|TNF	-2.13879	0	16	0	0	-10.0272	228.871
1	-3.60287	GO:0010633	M1	1	0	GO Biological Processes	19	negative regulation of epithelial cell migration	19_GO:0040011 locomotion	-3.60287	24.5219	8.24694	30211	112	33	3	9.09091	5.00438	5728|7040|7124	PTEN|TGFB1|TNF	-2.11919	0	16	0	0	-10.0272	228.871
1	-3.58025	GO:0043200	M1	1	0	GO Biological Processes	19	response to amino acid	19_GO:0050896 response to stimulus	-3.58025	24.0917	8.16834	30211	114	33	3	9.09091	5.00438	1728|1956|7124	NQO1|EGFR|TNF	-2.09828	0	16	0	0	-10.0272	228.871
1	-3.55804	GO:0043406	M1	1	0	GO Biological Processes	19	positive regulation of MAP kinase activity	19_GO:0023052 signaling	-3.55804	23.6763	8.09174	30211	116	33	3	9.09091	5.00438	1956|7040|7124	EGFR|TGFB1|TNF	-2.07863	0	16	0	0	-10.0272	228.871
1	-3.52545	GO:0051897	M1	1	0	GO Biological Processes	19	positive regulation of protein kinase B signaling	19_GO:0023052 signaling	-3.52545	23.0794	7.98038	30211	119	33	3	9.09091	5.00438	1956|7040|7124	EGFR|TGFB1|TNF	-2.04943	0	16	0	0	-10.0272	228.871
1	-3.47299	GO:1904375	M1	1	0	GO Biological Processes	19	regulation of protein localization to cell periphery	19_GO:0051179 localization	-3.47299	22.1488	7.8036	30211	124	33	3	9.09091	5.00438	1956|7040|7124	EGFR|TGFB1|TNF	-2.00449	0	16	0	0	-10.0272	228.871
1	-3.31882	GO:0046328	M1	1	0	GO Biological Processes	19	regulation of JNK cascade	19_GO:0023052 signaling	-3.31882	19.6175	7.30129	30211	140	33	3	9.09091	5.00438	1956|2950|7124	EGFR|GSTP1|TNF	-1.86818	0	16	0	0	-10.0272	228.871
1	-3.05918	GO:1905475	M1	1	0	GO Biological Processes	19	regulation of protein localization to membrane	19_GO:0051179 localization	-3.05918	15.9678	6.50977	30211	172	33	3	9.09091	5.00438	1956|7040|7124	EGFR|TGFB1|TNF	-1.63925	0	16	0	0	-10.0272	228.871
1	-2.93458	GO:0050731	M1	1	0	GO Biological Processes	19	positive regulation of peptidyl-tyrosine phosphorylation	19_GO:0048518 positive regulation of biological process	-2.93458	14.455	6.15228	30211	190	33	3	9.09091	5.00438	7040|7124|7157	TGFB1|TNF|TP53	-1.53208	0	16	0	0	-10.0272	228.871
1	-2.66557	GO:0002703	M1	1	0	GO Biological Processes	19	regulation of leukocyte mediated immunity	19_GO:0002376 immune system process	-2.66557	11.6375	5.42505	30211	236	33	3	9.09091	5.00438	3162|7040|7124	HMOX1|TGFB1|TNF	-1.28256	0	16	0	0	-10.0272	228.871
1	-2.56558	GO:1903522	M1	1	0	GO Biological Processes	19	regulation of blood circulation	19_GO:0032501 multicellular organismal process	-2.56558	10.7283	5.16905	30211	256	33	3	9.09091	5.00438	5743|7042|7124	PTGS2|TGFB2|TNF	-1.18866	0	16	0	0	-10.0272	228.871
1	-2.51868	GO:0030198	M1	1	0	GO Biological Processes	19	extracellular matrix organization	19_GO:0009987 cellular process	-2.51868	10.325	5.05144	30211	266	33	3	9.09091	5.00438	7040|7042|7124	TGFB1|TGFB2|TNF	-1.14775	0	16	0	0	-10.0272	228.871
1	-2.51409	GO:0043062	M1	1	0	GO Biological Processes	19	extracellular structure organization	19_GO:0009987 cellular process	-2.51409	10.2863	5.04003	30211	267	33	3	9.09091	5.00438	7040|7042|7124	TGFB1|TGFB2|TNF	-1.14383	0	16	0	0	-10.0272	228.871
1	-2.50498	GO:0045229	M1	1	0	GO Biological Processes	19	external encapsulating structure organization	19_GO:0009987 cellular process	-2.50498	10.2099	5.01737	30211	269	33	3	9.09091	5.00438	7040|7042|7124	TGFB1|TGFB2|TNF	-1.13669	0	16	0	0	-10.0272	228.871
1	-2.47011	GO:0044057	M1	1	0	GO Biological Processes	19	regulation of system process	19_GO:0032501 multicellular organismal process	-2.47011	6.39082	4.30819	30211	573	33	4	12.1212	5.68144	5728|5743|7042|7124	PTEN|PTGS2|TGFB2|TNF	-1.1038	0	16	0	0	-10.0272	228.871
1	-9.52571	GO:0042176	M1	1	0	GO Biological Processes	19	regulation of protein catabolic process	19_GO:0008152 metabolic process	-9.52571	20.8591	13.1378	30211	395	33	9	27.2727	7.75275	1956|2932|4734|4780|5728|5970|6622|7124|7128	EGFR|GSK3B|NEDD4|NFE2L2|PTEN|RELA|SNCA|TNF|TNFAIP3	-7.18298	0	17	1	1	-9.52571	46.5501
1	-8.60625	GO:0009896	M1	1	0	GO Biological Processes	19	positive regulation of catabolic process	19_GO:0048518 positive regulation of biological process	-8.60625	16.3804	11.5028	30211	503	33	9	27.2727	7.75275	2932|3162|4609|4734|4780|5728|6622|7124|7128	GSK3B|HMOX1|MYC|NEDD4|NFE2L2|PTEN|SNCA|TNF|TNFAIP3	-6.32915	0	17	0	0	-9.52571	46.5501
1	-7.72492	GO:0031331	M1	1	0	GO Biological Processes	19	positive regulation of cellular catabolic process	19_GO:0048518 positive regulation of biological process	-7.72492	16.6831	10.9458	30211	439	33	8	24.2424	7.46009	2932|3162|4609|4780|5728|6622|7124|7128	GSK3B|HMOX1|MYC|NFE2L2|PTEN|SNCA|TNF|TNFAIP3	-5.56647	0	17	0	0	-9.52571	46.5501
1	-6.73612	GO:0045732	M1	1	0	GO Biological Processes	19	positive regulation of protein catabolic process	19_GO:0048518 positive regulation of biological process	-6.73612	23.5747	11.4389	30211	233	33	6	18.1818	6.71408	2932|4734|4780|5728|7124|7128	GSK3B|NEDD4|NFE2L2|PTEN|TNF|TNFAIP3	-4.74969	0	17	0	0	-9.52571	46.5501
1	-6.48206	GO:0061041	M1	1	0	GO Biological Processes	19	regulation of wound healing	19_GO:0050896 response to stimulus	-6.48206	34.4167	12.7718	30211	133	33	5	15.1515	6.24156	301|4780|5728|7124|7128	ANXA1|NFE2L2|PTEN|TNF|TNFAIP3	-4.53478	0	17	0	0	-9.52571	46.5501
1	-6.00524	GO:1903034	M1	1	0	GO Biological Processes	19	regulation of response to wounding	19_GO:0050896 response to stimulus	-6.00524	27.5748	11.3534	30211	166	33	5	15.1515	6.24156	301|4780|5728|7124|7128	ANXA1|NFE2L2|PTEN|TNF|TNFAIP3	-4.13128	0	17	0	0	-9.52571	46.5501
1	-4.5928	GO:1903364	M1	1	0	GO Biological Processes	19	positive regulation of cellular protein catabolic process	19_GO:0048518 positive regulation of biological process	-4.5928	23.3245	9.27399	30211	157	33	4	12.1212	5.68144	2932|4780|5728|7128	GSK3B|NFE2L2|PTEN|TNFAIP3	-2.93899	0	17	0	0	-9.52571	46.5501
1	-4.43153	GO:2000351	M1	1	0	GO Biological Processes	19	regulation of endothelial cell apoptotic process	19_GO:0050789 regulation of biological process	-4.43153	46.5501	11.5809	30211	59	33	3	9.09091	5.00438	4780|7124|7128	NFE2L2|TNF|TNFAIP3	-2.80599	0	17	0	0	-9.52571	46.5501
1	-4.36678	GO:2000736	M1	1	0	GO Biological Processes	19	regulation of stem cell differentiation	19_GO:0032502 developmental process	-4.36678	44.2977	11.2852	30211	62	33	3	9.09091	5.00438	2932|4780|7042	GSK3B|NFE2L2|TGFB2	-2.75414	0	17	0	0	-9.52571	46.5501
1	-4.00618	GO:0010975	M1	1	0	GO Biological Processes	19	regulation of neuron projection development	19_GO:0032502 developmental process	-4.00618	10.6205	6.65212	30211	431	33	5	15.1515	6.24156	2932|3309|4734|4780|5728	GSK3B|HSPA5|NEDD4|NFE2L2|PTEN	-2.45384	0	17	0	0	-9.52571	46.5501
1	-3.75701	GO:1903362	M1	1	0	GO Biological Processes	19	regulation of cellular protein catabolic process	19_GO:0008152 metabolic process	-3.75701	14.1936	7.03783	30211	258	33	4	12.1212	5.68144	2932|4780|5728|7128	GSK3B|NFE2L2|PTEN|TNFAIP3	-2.24495	0	17	0	0	-9.52571	46.5501
1	-3.6494	GO:2000060	M1	1	0	GO Biological Processes	19	positive regulation of ubiquitin-dependent protein catabolic process	19_GO:0048518 positive regulation of biological process	-3.6494	25.4301	8.41046	30211	108	33	3	9.09091	5.00438	2932|4780|5728	GSK3B|NFE2L2|PTEN	-2.16054	0	17	0	0	-9.52571	46.5501
1	-3.37437	GO:1903052	M1	1	0	GO Biological Processes	19	positive regulation of proteolysis involved in cellular protein catabolic process	19_GO:0048518 positive regulation of biological process	-3.37437	20.4959	7.47939	30211	134	33	3	9.09091	5.00438	2932|4780|5728	GSK3B|NFE2L2|PTEN	-1.91571	0	17	0	0	-9.52571	46.5501
1	-3.27077	GO:0120035	M1	1	0	GO Biological Processes	19	regulation of plasma membrane bounded cell projection organization	19_GO:0050789 regulation of biological process	-3.27077	7.3592	5.29932	30211	622	33	5	15.1515	6.24156	2932|3309|4734|4780|5728	GSK3B|HSPA5|NEDD4|NFE2L2|PTEN	-1.82957	0	17	0	0	-9.52571	46.5501
1	-3.21775	GO:0031344	M1	1	0	GO Biological Processes	19	regulation of cell projection organization	19_GO:0050789 regulation of biological process	-3.21775	7.16342	5.20737	30211	639	33	5	15.1515	6.24156	2932|3309|4734|4780|5728	GSK3B|HSPA5|NEDD4|NFE2L2|PTEN	-1.78274	0	17	0	0	-9.52571	46.5501
1	-3.10379	GO:2000058	M1	1	0	GO Biological Processes	19	regulation of ubiquitin-dependent protein catabolic process	19_GO:0008152 metabolic process	-3.10379	16.5449	6.64115	30211	166	33	3	9.09091	5.00438	2932|4780|5728	GSK3B|NFE2L2|PTEN	-1.67863	0	17	0	0	-9.52571	46.5501
1	-2.73553	GO:1903050	M1	1	0	GO Biological Processes	19	regulation of proteolysis involved in cellular protein catabolic process	19_GO:0008152 metabolic process	-2.73553	12.3159	5.60863	30211	223	33	3	9.09091	5.00438	2932|4780|5728	GSK3B|NFE2L2|PTEN	-1.34497	0	17	0	0	-9.52571	46.5501
1	-2.21807	GO:0031346	M1	1	0	GO Biological Processes	19	positive regulation of cell projection organization	19_GO:0048518 positive regulation of biological process	-2.21807	8.05412	4.33201	30211	341	33	3	9.09091	5.00438	2932|3309|4780	GSK3B|HSPA5|NFE2L2	-0.862104	0	17	0	0	-9.52571	46.5501
1	-9.30038	GO:0048608	M1	1	0	GO Biological Processes	19	reproductive structure development	19_GO:0022414 reproductive process	-9.30038	19.6644	12.7221	30211	419	33	9	27.2727	7.75275	301|841|1956|3309|4609|5594|5728|5743|7042	ANXA1|CASP8|EGFR|HSPA5|MYC|MAPK1|PTEN|PTGS2|TGFB2	-6.96988	0	18	1	1	-9.30038	31.9355
1	-9.27317	GO:0061458	M1	1	0	GO Biological Processes	19	reproductive system development	19_GO:0032502 developmental process	-9.27317	19.5246	12.6725	30211	422	33	9	27.2727	7.75275	301|841|1956|3309|4609|5594|5728|5743|7042	ANXA1|CASP8|EGFR|HSPA5|MYC|MAPK1|PTEN|PTGS2|TGFB2	-6.94866	0	18	0	0	-9.30038	31.9355
1	-5.67573	GO:0007610	M1	1	0	GO Biological Processes	19	behavior	19_GO:0007610 behavior	-5.67573	11.3826	8.22335	30211	563	33	7	21.2121	7.11647	1956|5594|5728|5743|6622|7157|7345	EGFR|MAPK1|PTEN|PTGS2|SNCA|TP53|UCHL1	-3.83815	0	18	0	0	-9.30038	31.9355
1	-4.71659	GO:0001890	M1	1	0	GO Biological Processes	19	placenta development	19_GO:0022414 reproductive process	-4.71659	25.0818	9.64543	30211	146	33	4	12.1212	5.68144	841|1956|5594|5743	CASP8|EGFR|MAPK1|PTGS2	-3.0393	0	18	0	0	-9.30038	31.9355
1	-4.71208	GO:0050890	M1	1	0	GO Biological Processes	19	cognition	19_GO:0032501 multicellular organismal process	-4.71208	14.9589	8.11572	30211	306	33	5	15.1515	6.24156	1956|5594|5728|5743|7124	EGFR|MAPK1|PTEN|PTGS2|TNF	-3.03613	0	18	0	0	-9.30038	31.9355
1	-3.94221	GO:0001892	M1	1	0	GO Biological Processes	19	embryonic placenta development	19_GO:0022414 reproductive process	-3.94221	31.9355	9.50014	30211	86	33	3	9.09091	5.00438	841|1956|5594	CASP8|EGFR|MAPK1	-2.40372	0	18	0	0	-9.30038	31.9355
1	-3.71884	GO:0007611	M1	1	0	GO Biological Processes	19	learning or memory	19_GO:0007610 behavior	-3.71884	13.871	6.94583	30211	264	33	4	12.1212	5.68144	1956|5594|5728|5743	EGFR|MAPK1|PTEN|PTGS2	-2.22209	0	18	0	0	-9.30038	31.9355
1	-9.19272	GO:0009314	M1	1	0	GO Biological Processes	19	response to radiation	19_GO:0050896 response to stimulus	-9.19272	19.1169	12.527	30211	431	33	9	27.2727	7.75275	301|1956|3309|4609|4734|5743|5970|7124|7157	ANXA1|EGFR|HSPA5|MYC|NEDD4|PTGS2|RELA|TNF|TP53	-6.87412	0	19	1	1	-9.19272	91.5485
1	-7.94212	GO:0009411	M1	1	0	GO Biological Processes	19	response to UV	19_GO:0050896 response to stimulus	-7.94212	37.6227	14.6684	30211	146	33	6	18.1818	6.71408	1956|4609|4734|5743|5970|7157	EGFR|MYC|NEDD4|PTGS2|RELA|TP53	-5.74106	0	19	0	0	-9.19272	91.5485
1	-7.44859	GO:0071214	M1	1	0	GO Biological Processes	19	cellular response to abiotic stimulus	19_GO:0050896 response to stimulus	-7.44859	20.8742	11.574	30211	307	33	7	21.2121	7.11647	841|3309|4609|4734|5728|5743|7157	CASP8|HSPA5|MYC|NEDD4|PTEN|PTGS2|TP53	-5.33631	0	19	0	0	-9.19272	91.5485
1	-7.44859	GO:0104004	M1	1	0	GO Biological Processes	19	cellular response to environmental stimulus	19_GO:0050896 response to stimulus	-7.44859	20.8742	11.574	30211	307	33	7	21.2121	7.11647	841|3309|4609|4734|5728|5743|7157	CASP8|HSPA5|MYC|NEDD4|PTEN|PTGS2|TP53	-5.33631	0	19	0	0	-9.19272	91.5485
1	-6.06011	GO:0009416	M1	1	0	GO Biological Processes	19	response to light stimulus	19_GO:0050896 response to stimulus	-6.06011	18.0688	9.89099	30211	304	33	6	18.1818	6.71408	1956|4609|4734|5743|5970|7157	EGFR|MYC|NEDD4|PTGS2|RELA|TP53	-4.17977	0	19	0	0	-9.19272	91.5485
1	-5.86795	GO:0071478	M1	1	0	GO Biological Processes	19	cellular response to radiation	19_GO:0050896 response to stimulus	-5.86795	25.8612	10.9695	30211	177	33	5	15.1515	6.24156	3309|4609|4734|5743|7157	HSPA5|MYC|NEDD4|PTGS2|TP53	-4.00234	0	19	0	0	-9.19272	91.5485
1	-5.58874	GO:0034644	M1	1	0	GO Biological Processes	19	cellular response to UV	19_GO:0050896 response to stimulus	-5.58874	41.6129	12.6166	30211	88	33	4	12.1212	5.68144	4609|4734|5743|7157	MYC|NEDD4|PTGS2|TP53	-3.77566	0	19	0	0	-9.19272	91.5485
1	-5.32564	GO:0048147	M1	1	0	GO Biological Processes	19	negative regulation of fibroblast proliferation	19_GO:0048519 negative regulation of biological process	-5.32564	91.5485	16.4082	30211	30	33	3	9.09091	5.00438	2950|4609|7157	GSTP1|MYC|TP53	-3.55444	0	19	0	0	-9.19272	91.5485
1	-5.15599	GO:0071482	M1	1	0	GO Biological Processes	19	cellular response to light stimulus	19_GO:0050896 response to stimulus	-5.15599	32.4065	11.0606	30211	113	33	4	12.1212	5.68144	4609|4734|5743|7157	MYC|NEDD4|PTGS2|TP53	-3.41686	0	19	0	0	-9.19272	91.5485
1	-4.7761	GO:0010212	M1	1	0	GO Biological Processes	19	response to ionizing radiation	19_GO:0050896 response to stimulus	-4.7761	25.9712	9.8281	30211	141	33	4	12.1212	5.68144	301|3309|4609|7157	ANXA1|HSPA5|MYC|TP53	-3.08658	0	19	0	0	-9.19272	91.5485
1	-4.68475	GO:0019438	M1	1	0	GO Biological Processes	19	aromatic compound biosynthetic process	19_GO:0008152 metabolic process	-4.68475	8.02052	6.6507	30211	799	33	7	21.2121	7.11647	2182|4609|5970|6622|7040|7042|7157	ACSL4|MYC|RELA|SNCA|TGFB1|TGFB2|TP53	-3.01411	0	19	0	0	-9.19272	91.5485
1	-4.49977	GO:0010332	M1	1	0	GO Biological Processes	19	response to gamma radiation	19_GO:0050896 response to stimulus	-4.49977	49.0438	11.8998	30211	56	33	3	9.09091	5.00438	3309|4609|7157	HSPA5|MYC|TP53	-2.86179	0	19	0	0	-9.19272	91.5485
1	-2.99047	GO:0034654	M1	1	0	GO Biological Processes	19	nucleobase-containing compound biosynthetic process	19_GO:0008152 metabolic process	-2.99047	6.37524	4.82045	30211	718	33	5	15.1515	6.24156	2182|4609|5970|7040|7157	ACSL4|MYC|RELA|TGFB1|TP53	-1.57862	0	19	0	0	-9.19272	91.5485
1	-2.80665	GO:0018130	M1	1	0	GO Biological Processes	19	heterocycle biosynthetic process	19_GO:0008152 metabolic process	-2.80665	5.79421	4.51532	30211	790	33	5	15.1515	6.24156	2182|4609|5970|7040|7157	ACSL4|MYC|RELA|TGFB1|TP53	-1.40981	0	19	0	0	-9.19272	91.5485
1	-2.48099	GO:0006325	M1	1	0	GO Biological Processes	19	chromatin organization	19_GO:0009987 cellular process	-2.48099	6.43575	4.32861	30211	569	33	4	12.1212	5.68144	4609|5925|5970|7157	MYC|RB1|RELA|TP53	-1.11401	0	19	0	0	-9.19272	91.5485
1	-2.07055	GO:0006351	M1	1	0	GO Biological Processes	19	transcription, DNA-templated	19_GO:0008152 metabolic process	-2.07055	7.11517	3.99852	30211	386	33	3	9.09091	5.00438	4609|5970|7157	MYC|RELA|TP53	-0.724075	0	19	0	0	-9.19272	91.5485
1	-2.06444	GO:0097659	M1	1	0	GO Biological Processes	19	nucleic acid-templated transcription	19_GO:0008152 metabolic process	-2.06444	7.07849	3.98495	30211	388	33	3	9.09091	5.00438	4609|5970|7157	MYC|RELA|TP53	-0.719215	0	19	0	0	-9.19272	91.5485
1	-2.03144	GO:0032774	M1	1	0	GO Biological Processes	19	RNA biosynthetic process	19_GO:0008152 metabolic process	-2.03144	6.88334	3.91203	30211	399	33	3	9.09091	5.00438	4609|5970|7157	MYC|RELA|TP53	-0.686845	0	19	0	0	-9.19272	91.5485
1	-8.02989	GO:0043254	M1	1	0	GO Biological Processes	19	regulation of protein-containing complex assembly	19_GO:0050789 regulation of biological process	-8.02989	18.264	11.5086	30211	401	33	8	24.2424	7.46009	246|2932|3309|5925|6622|7040|7124|7157	ALOX15|GSK3B|HSPA5|RB1|SNCA|TGFB1|TNF|TP53	-5.80585	0	20	1	1	-8.02989	49.0438
1	-7.384	GO:0010638	M1	1	0	GO Biological Processes	19	positive regulation of organelle organization	19_GO:0048518 positive regulation of biological process	-7.384	15.0697	10.3402	30211	486	33	8	24.2424	7.46009	246|301|2932|5594|5925|6622|7124|7157	ALOX15|ANXA1|GSK3B|MAPK1|RB1|SNCA|TNF|TP53	-5.28607	0	20	0	0	-8.02989	49.0438
1	-7.20615	GO:0031334	M1	1	0	GO Biological Processes	19	positive regulation of protein-containing complex assembly	19_GO:0048518 positive regulation of biological process	-7.20615	28.314	12.6209	30211	194	33	6	18.1818	6.71408	246|2932|6622|7040|7124|7157	ALOX15|GSK3B|SNCA|TGFB1|TNF|TP53	-5.13226	0	20	0	0	-8.02989	49.0438
1	-6.46979	GO:0050804	M1	1	0	GO Biological Processes	19	modulation of chemical synaptic transmission	19_GO:0023052 signaling	-6.46979	14.9729	9.62744	30211	428	33	7	21.2121	7.11647	2932|5594|5728|5743|6622|7124|85445	GSK3B|MAPK1|PTEN|PTGS2|SNCA|TNF|CNTNAP4	-4.52748	0	20	0	0	-8.02989	49.0438
1	-6.46298	GO:0099177	M1	1	0	GO Biological Processes	19	regulation of trans-synaptic signaling	19_GO:0023052 signaling	-6.46298	14.938	9.61477	30211	429	33	7	21.2121	7.11647	2932|5594|5728|5743|6622|7124|85445	GSK3B|MAPK1|PTEN|PTGS2|SNCA|TNF|CNTNAP4	-4.52557	0	20	0	0	-8.02989	49.0438
1	-6.35602	GO:0050806	M1	1	0	GO Biological Processes	19	positive regulation of synaptic transmission	19_GO:0023052 signaling	-6.35602	32.464	12.3835	30211	141	33	5	15.1515	6.24156	5594|5728|5743|6622|7124	MAPK1|PTEN|PTGS2|SNCA|TNF	-4.43064	0	20	0	0	-8.02989	49.0438
1	-5.85492	GO:0060627	M1	1	0	GO Biological Processes	19	regulation of vesicle-mediated transport	19_GO:0051179 localization	-5.85492	12.1142	8.52796	30211	529	33	7	21.2121	7.11647	246|301|2932|3162|5594|6622|7124	ALOX15|ANXA1|GSK3B|HMOX1|MAPK1|SNCA|TNF	-3.99547	0	20	0	0	-8.02989	49.0438
1	-5.79676	GO:0006109	M1	1	0	GO Biological Processes	19	regulation of carbohydrate metabolic process	19_GO:0008152 metabolic process	-5.79676	25.0132	10.7746	30211	183	33	5	15.1515	6.24156	2932|4609|6622|7040|7157	GSK3B|MYC|SNCA|TGFB1|TP53	-3.94539	0	20	0	0	-8.02989	49.0438
1	-5.63968	GO:0048167	M1	1	0	GO Biological Processes	19	regulation of synaptic plasticity	19_GO:0023052 signaling	-5.63968	23.2357	10.354	30211	197	33	5	15.1515	6.24156	2932|5594|5728|5743|6622	GSK3B|MAPK1|PTEN|PTGS2|SNCA	-3.8074	0	20	0	0	-8.02989	49.0438
1	-5.22131	GO:0042391	M1	1	0	GO Biological Processes	19	regulation of membrane potential	19_GO:0065007 biological regulation	-5.22131	12.9245	8.18682	30211	425	33	6	18.1818	6.71408	2932|4609|4734|5728|6622|7124	GSK3B|MYC|NEDD4|PTEN|SNCA|TNF	-3.47123	0	20	0	0	-8.02989	49.0438
1	-5.15599	GO:0007006	M1	1	0	GO Biological Processes	19	mitochondrial membrane organization	19_GO:0009987 cellular process	-5.15599	32.4065	11.0606	30211	113	33	4	12.1212	5.68144	2932|4609|6622|7157	GSK3B|MYC|SNCA|TP53	-3.41686	0	20	0	0	-8.02989	49.0438
1	-5.1242	GO:0099536	M1	1	0	GO Biological Processes	19	synaptic signaling	19_GO:0023052 signaling	-5.1242	12.4274	8.0032	30211	442	33	6	18.1818	6.71408	1728|2932|5594|5728|5970|6622	NQO1|GSK3B|MAPK1|PTEN|RELA|SNCA	-3.39143	0	20	0	0	-8.02989	49.0438
1	-5.12102	GO:0051129	M1	1	0	GO Biological Processes	19	negative regulation of cellular component organization	19_GO:0048519 negative regulation of biological process	-5.12102	9.369	7.32114	30211	684	33	7	21.2121	7.11647	2932|3309|5728|6622|7040|7124|7157	GSK3B|HSPA5|PTEN|SNCA|TGFB1|TNF|TP53	-3.39143	0	20	0	0	-8.02989	49.0438
1	-4.85519	GO:0044089	M1	1	0	GO Biological Processes	19	positive regulation of cellular component biogenesis	19_GO:0048518 positive regulation of biological process	-4.85519	11.1418	7.50786	30211	493	33	6	18.1818	6.71408	246|2932|6622|7040|7124|7157	ALOX15|GSK3B|SNCA|TGFB1|TNF|TP53	-3.15872	0	20	0	0	-8.02989	49.0438
1	-4.49977	GO:0060291	M1	1	0	GO Biological Processes	19	long-term synaptic potentiation	19_GO:0023052 signaling	-4.49977	49.0438	11.8998	30211	56	33	3	9.09091	5.00438	5594|5728|6622	MAPK1|PTEN|SNCA	-2.86179	0	20	0	0	-8.02989	49.0438
1	-4.17922	GO:0007268	M1	1	0	GO Biological Processes	19	chemical synaptic transmission	19_GO:0023052 signaling	-4.17922	11.5592	6.99433	30211	396	33	5	15.1515	6.24156	1728|2932|5594|5728|6622	NQO1|GSK3B|MAPK1|PTEN|SNCA	-2.59453	0	20	0	0	-8.02989	49.0438
1	-4.17922	GO:0098916	M1	1	0	GO Biological Processes	19	anterograde trans-synaptic signaling	19_GO:0023052 signaling	-4.17922	11.5592	6.99433	30211	396	33	5	15.1515	6.24156	1728|2932|5594|5728|6622	NQO1|GSK3B|MAPK1|PTEN|SNCA	-2.59453	0	20	0	0	-8.02989	49.0438
1	-4.12512	GO:0050807	M1	1	0	GO Biological Processes	19	regulation of synapse organization	19_GO:0050789 regulation of biological process	-4.12512	17.6905	7.96806	30211	207	33	4	12.1212	5.68144	4734|5728|6622|7124	NEDD4|PTEN|SNCA|TNF	-2.54795	0	20	0	0	-8.02989	49.0438
1	-4.09321	GO:0099537	M1	1	0	GO Biological Processes	19	trans-synaptic signaling	19_GO:0023052 signaling	-4.09321	11.0834	6.82297	30211	413	33	5	15.1515	6.24156	1728|2932|5594|5728|6622	NQO1|GSK3B|MAPK1|PTEN|SNCA	-2.52027	0	20	0	0	-8.02989	49.0438
1	-4.07712	GO:0050803	M1	1	0	GO Biological Processes	19	regulation of synapse structure or activity	19_GO:0065007 biological regulation	-4.07712	17.1922	7.84218	30211	213	33	4	12.1212	5.68144	4734|5728|6622|7124	NEDD4|PTEN|SNCA|TNF	-2.50943	0	20	0	0	-8.02989	49.0438
1	-3.8276	GO:0043112	M1	1	0	GO Biological Processes	19	receptor metabolic process	19_GO:0008152 metabolic process	-3.8276	29.2176	9.06077	30211	94	33	3	9.09091	5.00438	4734|6622|7040	NEDD4|SNCA|TGFB1	-2.30063	0	20	0	0	-8.02989	49.0438
1	-3.81749	GO:0034330	M1	1	0	GO Biological Processes	19	cell junction organization	19_GO:0009987 cellular process	-3.81749	9.67743	6.29003	30211	473	33	5	15.1515	6.24156	4734|5728|6622|7040|7042	NEDD4|PTEN|SNCA|TGFB1|TGFB2	-2.29336	0	20	0	0	-8.02989	49.0438
1	-3.7872	GO:0071868	M1	1	0	GO Biological Processes	19	cellular response to monoamine stimulus	19_GO:0050896 response to stimulus	-3.7872	28.314	8.90991	30211	97	33	3	9.09091	5.00438	2932|5594|6622	GSK3B|MAPK1|SNCA	-2.26961	0	20	0	0	-8.02989	49.0438
1	-3.7872	GO:0071870	M1	1	0	GO Biological Processes	19	cellular response to catecholamine stimulus	19_GO:0050896 response to stimulus	-3.7872	28.314	8.90991	30211	97	33	3	9.09091	5.00438	2932|5594|6622	GSK3B|MAPK1|SNCA	-2.26961	0	20	0	0	-8.02989	49.0438
1	-3.76924	GO:0061024	M1	1	0	GO Biological Processes	19	membrane organization	19_GO:0009987 cellular process	-3.76924	7.09678	5.68213	30211	774	33	6	18.1818	6.71408	1956|2932|4609|5728|6622|7157	EGFR|GSK3B|MYC|PTEN|SNCA|TP53	-2.25535	0	20	0	0	-8.02989	49.0438
1	-3.74807	GO:0071867	M1	1	0	GO Biological Processes	19	response to monoamine	19_GO:0050896 response to stimulus	-3.74807	27.4645	8.76575	30211	100	33	3	9.09091	5.00438	2932|5594|6622	GSK3B|MAPK1|SNCA	-2.24057	0	20	0	0	-8.02989	49.0438
1	-3.74807	GO:0071869	M1	1	0	GO Biological Processes	19	response to catecholamine	19_GO:0050896 response to stimulus	-3.74807	27.4645	8.76575	30211	100	33	3	9.09091	5.00438	2932|5594|6622	GSK3B|MAPK1|SNCA	-2.24057	0	20	0	0	-8.02989	49.0438
1	-3.72266	GO:0043255	M1	1	0	GO Biological Processes	19	regulation of carbohydrate biosynthetic process	19_GO:0008152 metabolic process	-3.72266	26.926	8.67311	30211	102	33	3	9.09091	5.00438	2932|6622|7040	GSK3B|SNCA|TGFB1	-2.22502	0	20	0	0	-8.02989	49.0438
1	-3.50757	GO:0031647	M1	1	0	GO Biological Processes	19	regulation of protein stability	19_GO:0065007 biological regulation	-3.50757	12.2065	6.45061	30211	300	33	4	12.1212	5.68144	5594|5728|6622|7157	MAPK1|PTEN|SNCA|TP53	-2.03407	0	20	0	0	-8.02989	49.0438
1	-3.3279	GO:0031333	M1	1	0	GO Biological Processes	19	negative regulation of protein-containing complex assembly	19_GO:0048519 negative regulation of biological process	-3.3279	19.7587	7.33019	30211	139	33	3	9.09091	5.00438	2932|3309|6622	GSK3B|HSPA5|SNCA	-1.87327	0	20	0	0	-8.02989	49.0438
1	-3.23152	GO:0010675	M1	1	0	GO Biological Processes	19	regulation of cellular carbohydrate metabolic process	19_GO:0008152 metabolic process	-3.23152	18.3097	7.02782	30211	150	33	3	9.09091	5.00438	2932|6622|7157	GSK3B|SNCA|TP53	-1.79497	0	20	0	0	-8.02989	49.0438
1	-2.96817	GO:0007005	M1	1	0	GO Biological Processes	19	mitochondrion organization	19_GO:0009987 cellular process	-2.96817	8.76062	5.28341	30211	418	33	4	12.1212	5.68144	2932|4609|6622|7157	GSK3B|MYC|SNCA|TP53	-1.56066	0	20	0	0	-8.02989	49.0438
1	-2.86442	GO:1901888	M1	1	0	GO Biological Processes	19	regulation of cell junction assembly	19_GO:0050789 regulation of biological process	-2.86442	13.664	5.95692	30211	201	33	3	9.09091	5.00438	5728|6622|7124	PTEN|SNCA|TNF	-1.46546	0	20	0	0	-8.02989	49.0438
1	-2.62958	GO:0015980	M1	1	0	GO Biological Processes	19	energy derivation by oxidation of organic compounds	19_GO:0008152 metabolic process	-2.62958	11.3023	5.33206	30211	243	33	3	9.09091	5.00438	2932|4609|6622	GSK3B|MYC|SNCA	-1.24793	0	20	0	0	-8.02989	49.0438
1	-2.60656	GO:0051493	M1	1	0	GO Biological Processes	19	regulation of cytoskeleton organization	19_GO:0050789 regulation of biological process	-2.60656	6.97512	4.56707	30211	525	33	4	12.1212	5.68144	246|2932|5594|6622	ALOX15|GSK3B|MAPK1|SNCA	-1.22761	0	20	0	0	-8.02989	49.0438
1	-2.43884	GO:0050808	M1	1	0	GO Biological Processes	19	synapse organization	19_GO:0009987 cellular process	-2.43884	9.67061	4.85472	30211	284	33	3	9.09091	5.00438	4734|5728|6622	NEDD4|PTEN|SNCA	-1.07514	0	20	0	0	-8.02989	49.0438
1	-2.29816	GO:1905114	M1	1	0	GO Biological Processes	19	cell surface receptor signaling pathway involved in cell-cell signaling	19_GO:0023052 signaling	-2.29816	8.60958	4.5182	30211	319	33	3	9.09091	5.00438	2932|5728|6622	GSK3B|PTEN|SNCA	-0.94156	0	20	0	0	-8.02989	49.0438
1	-2.06444	GO:0006091	M1	1	0	GO Biological Processes	19	generation of precursor metabolites and energy	19_GO:0008152 metabolic process	-2.06444	7.07849	3.98495	30211	388	33	3	9.09091	5.00438	2932|4609|6622	GSK3B|MYC|SNCA	-0.719215	0	20	0	0	-8.02989	49.0438
1	-7.97803	GO:0033135	M1	1	0	GO Biological Processes	19	regulation of peptidyl-serine phosphorylation	19_GO:0008152 metabolic process	-7.97803	38.1452	14.775	30211	144	33	6	18.1818	6.71408	1956|5728|5743|6622|7040|7124	EGFR|PTEN|PTGS2|SNCA|TGFB1|TNF	-5.77247	0	21	1	1	-7.97803	114.436
1	-7.54628	GO:0051051	M1	1	0	GO Biological Processes	19	negative regulation of transport	19_GO:0051179 localization	-7.54628	15.8183	10.6255	30211	463	33	8	24.2424	7.46009	301|3162|4609|4734|5728|5743|6622|7124	ANXA1|HMOX1|MYC|NEDD4|PTEN|PTGS2|SNCA|TNF	-5.40766	0	21	0	0	-7.97803	114.436
1	-7.14695	GO:0030162	M1	1	0	GO Biological Processes	19	regulation of proteolysis	19_GO:0008152 metabolic process	-7.14695	11.0893	9.20806	30211	743	33	9	27.2727	7.75275	841|2932|4609|4780|5728|5743|6622|7124|7157	CASP8|GSK3B|MYC|NFE2L2|PTEN|PTGS2|SNCA|TNF|TP53	-5.08297	0	21	0	0	-7.97803	114.436
1	-7.12881	GO:0062012	M1	1	0	GO Biological Processes	19	regulation of small molecule metabolic process	19_GO:0008152 metabolic process	-7.12881	18.738	10.9092	30211	342	33	7	21.2121	7.11647	301|2932|4609|5743|6622|7124|7157	ANXA1|GSK3B|MYC|PTGS2|SNCA|TNF|TP53	-5.07347	0	21	0	0	-7.97803	114.436
1	-6.95381	GO:0033138	M1	1	0	GO Biological Processes	19	positive regulation of peptidyl-serine phosphorylation	19_GO:0048518 positive regulation of biological process	-6.95381	42.7797	14.3163	30211	107	33	5	15.1515	6.24156	1956|5743|6622|7040|7124	EGFR|PTGS2|SNCA|TGFB1|TNF	-4.92952	0	21	0	0	-7.97803	114.436
1	-6.90472	GO:0045862	M1	1	0	GO Biological Processes	19	positive regulation of proteolysis	19_GO:0048518 positive regulation of biological process	-6.90472	17.3669	10.4605	30211	369	33	7	21.2121	7.11647	841|2932|4609|4780|5728|6622|7124	CASP8|GSK3B|MYC|NFE2L2|PTEN|SNCA|TNF	-4.89299	0	21	0	0	-7.97803	114.436
1	-6.46588	GO:0043467	M1	1	0	GO Biological Processes	19	regulation of generation of precursor metabolites and energy	19_GO:0008152 metabolic process	-6.46588	34.1599	12.7214	30211	134	33	5	15.1515	6.24156	2932|4609|6622|7124|7157	GSK3B|MYC|SNCA|TNF|TP53	-4.52603	0	21	0	0	-7.97803	114.436
1	-6.3418	GO:0048545	M1	1	0	GO Biological Processes	19	response to steroid hormone	19_GO:0050896 response to stimulus	-6.3418	20.1945	10.5155	30211	272	33	6	18.1818	6.71408	301|4734|5743|7040|7042|7124	ANXA1|NEDD4|PTGS2|TGFB1|TGFB2|TNF	-4.42348	0	21	0	0	-7.97803	114.436
1	-6.28095	GO:0062013	M1	1	0	GO Biological Processes	19	positive regulation of small molecule metabolic process	19_GO:0048518 positive regulation of biological process	-6.28095	31.3522	12.1569	30211	146	33	5	15.1515	6.24156	301|4609|5743|6622|7124	ANXA1|MYC|PTGS2|SNCA|TNF	-4.36728	0	21	0	0	-7.97803	114.436
1	-6.0769	GO:0001934	M1	1	0	GO Biological Processes	19	positive regulation of protein phosphorylation	19_GO:0048518 positive regulation of biological process	-6.0769	10.1439	8.22349	30211	722	33	8	24.2424	7.46009	1956|5594|5743|6622|7040|7042|7124|7157	EGFR|MAPK1|PTGS2|SNCA|TGFB1|TGFB2|TNF|TP53	-4.19162	0	21	0	0	-7.97803	114.436
1	-5.62601	GO:0002082	M1	1	0	GO Biological Processes	19	regulation of oxidative phosphorylation	19_GO:0008152 metabolic process	-5.62601	114.436	18.3837	30211	24	33	3	9.09091	5.00438	4609|6622|7124	MYC|SNCA|TNF	-3.8074	0	21	0	0	-7.97803	114.436
1	-5.56911	GO:1903578	M1	1	0	GO Biological Processes	19	regulation of ATP metabolic process	19_GO:0008152 metabolic process	-5.56911	41.1454	12.5423	30211	89	33	4	12.1212	5.68144	4609|6622|7124|7157	MYC|SNCA|TNF|TP53	-3.75967	0	21	0	0	-7.97803	114.436
1	-5.56544	GO:0043281	M1	1	0	GO Biological Processes	19	regulation of cysteine-type endopeptidase activity involved in apoptotic process	19_GO:0008152 metabolic process	-5.56544	22.4384	10.1597	30211	204	33	5	15.1515	6.24156	841|4609|5743|6622|7124	CASP8|MYC|PTGS2|SNCA|TNF	-3.75782	0	21	0	0	-7.97803	114.436
1	-5.55959	GO:0051346	M1	1	0	GO Biological Processes	19	negative regulation of hydrolase activity	19_GO:0065007 biological regulation	-5.55959	14.8057	8.84775	30211	371	33	6	18.1818	6.71408	301|2932|5743|6622|7042|7124	ANXA1|GSK3B|PTGS2|SNCA|TGFB2|TNF	-3.75557	0	21	0	0	-7.97803	114.436
1	-5.32734	GO:0001775	M1	1	0	GO Biological Processes	19	cell activation	19_GO:0009987 cellular process	-5.32734	10.0761	7.64984	30211	636	33	7	21.2121	7.11647	301|841|3315|3725|6622|7124|7157	ANXA1|CASP8|HSPB1|JUN|SNCA|TNF|TP53	-3.55444	0	21	0	0	-7.97803	114.436
1	-5.32564	GO:0001774	M1	1	0	GO Biological Processes	19	microglial cell activation	19_GO:0002376 immune system process	-5.32564	91.5485	16.4082	30211	30	33	3	9.09091	5.00438	3725|6622|7124	JUN|SNCA|TNF	-3.55444	0	21	0	0	-7.97803	114.436
1	-5.32564	GO:1903579	M1	1	0	GO Biological Processes	19	negative regulation of ATP metabolic process	19_GO:0048519 negative regulation of biological process	-5.32564	91.5485	16.4082	30211	30	33	3	9.09091	5.00438	6622|7124|7157	SNCA|TNF|TP53	-3.55444	0	21	0	0	-7.97803	114.436
1	-5.32046	GO:2000116	M1	1	0	GO Biological Processes	19	regulation of cysteine-type endopeptidase activity	19_GO:0008152 metabolic process	-5.32046	19.9888	9.5383	30211	229	33	5	15.1515	6.24156	841|4609|5743|6622|7124	CASP8|MYC|PTGS2|SNCA|TNF	-3.55093	0	21	0	0	-7.97803	114.436
1	-5.19826	GO:1903715	M1	1	0	GO Biological Processes	19	regulation of aerobic respiration	19_GO:0008152 metabolic process	-5.19826	83.2259	15.6281	30211	33	33	3	9.09091	5.00438	4609|6622|7124	MYC|SNCA|TNF	-3.44976	0	21	0	0	-7.97803	114.436
1	-5.1242	GO:0032103	M1	1	0	GO Biological Processes	19	positive regulation of response to external stimulus	19_GO:0048518 positive regulation of biological process	-5.1242	12.4274	8.0032	30211	442	33	6	18.1818	6.71408	3315|5594|5743|6622|7040|7124	HSPB1|MAPK1|PTGS2|SNCA|TGFB1|TNF	-3.39143	0	21	0	0	-7.97803	114.436
1	-4.9962	GO:0034341	M1	1	0	GO Biological Processes	19	response to interferon-gamma	19_GO:0044419 biological process involved in interspecies interaction between organisms	-4.9962	29.5318	10.5278	30211	124	33	4	12.1212	5.68144	4609|6622|7124|7157	MYC|SNCA|TNF|TP53	-3.28404	0	21	0	0	-7.97803	114.436
1	-4.98241	GO:0043280	M1	1	0	GO Biological Processes	19	positive regulation of cysteine-type endopeptidase activity involved in apoptotic process	19_GO:0048518 positive regulation of biological process	-4.98241	29.2955	10.4828	30211	125	33	4	12.1212	5.68144	841|4609|6622|7124	CASP8|MYC|SNCA|TNF	-3.2717	0	21	0	0	-7.97803	114.436
1	-4.88896	GO:0070555	M1	1	0	GO Biological Processes	19	response to interleukin-1	19_GO:0050896 response to stimulus	-4.88896	27.742	10.1821	30211	132	33	4	12.1212	5.68144	301|4609|5970|6622	ANXA1|MYC|RELA|SNCA	-3.18827	0	21	0	0	-7.97803	114.436
1	-4.8632	GO:2001235	M1	1	0	GO Biological Processes	19	positive regulation of apoptotic signaling pathway	19_GO:0023052 signaling	-4.8632	27.3279	10.1004	30211	134	33	4	12.1212	5.68144	4609|5728|7124|7157	MYC|PTEN|TNF|TP53	-3.16533	0	21	0	0	-7.97803	114.436
1	-4.83784	GO:0002274	M1	1	0	GO Biological Processes	19	myeloid leukocyte activation	19_GO:0002376 immune system process	-4.83784	26.926	10.0205	30211	136	33	4	12.1212	5.68144	301|3725|6622|7124	ANXA1|JUN|SNCA|TNF	-3.14417	0	21	0	0	-7.97803	114.436
1	-4.82061	GO:0060284	M1	1	0	GO Biological Processes	19	regulation of cell development	19_GO:0032502 developmental process	-4.82061	10.9858	7.44556	30211	500	33	6	18.1818	6.71408	2932|4609|5728|7040|7124|7157	GSK3B|MYC|PTEN|TGFB1|TNF|TP53	-3.12832	0	21	0	0	-7.97803	114.436
1	-4.75203	GO:2001056	M1	1	0	GO Biological Processes	19	positive regulation of cysteine-type endopeptidase activity	19_GO:0048518 positive regulation of biological process	-4.75203	25.608	9.75391	30211	143	33	4	12.1212	5.68144	841|4609|6622|7124	CASP8|MYC|SNCA|TNF	-3.06526	0	21	0	0	-7.97803	114.436
1	-4.74823	GO:0045321	M1	1	0	GO Biological Processes	19	leukocyte activation	19_GO:0002376 immune system process	-4.74823	10.6658	7.31613	30211	515	33	6	18.1818	6.71408	301|841|3725|6622|7124|7157	ANXA1|CASP8|JUN|SNCA|TNF|TP53	-3.06282	0	21	0	0	-7.97803	114.436
1	-4.64837	GO:0043457	M1	1	0	GO Biological Processes	19	regulation of cellular respiration	19_GO:0008152 metabolic process	-4.64837	54.9291	12.6204	30211	50	33	3	9.09091	5.00438	4609|6622|7124	MYC|SNCA|TNF	-2.98298	0	21	0	0	-7.97803	114.436
1	-4.63674	GO:0045834	M1	1	0	GO Biological Processes	19	positive regulation of lipid metabolic process	19_GO:0048518 positive regulation of biological process	-4.63674	23.9342	9.40453	30211	153	33	4	12.1212	5.68144	301|5743|7040|7124	ANXA1|PTGS2|TGFB1|TNF	-2.97265	0	21	0	0	-7.97803	114.436
1	-4.61462	GO:0043271	M1	1	0	GO Biological Processes	19	negative regulation of ion transport	19_GO:0051179 localization	-4.61462	23.6254	9.33865	30211	155	33	4	12.1212	5.68144	4734|5743|6622|7124	NEDD4|PTGS2|SNCA|TNF	-2.9549	0	21	0	0	-7.97803	114.436
1	-4.52336	GO:0042116	M1	1	0	GO Biological Processes	19	macrophage activation	19_GO:0002376 immune system process	-4.52336	49.9355	12.0117	30211	55	33	3	9.09091	5.00438	3725|6622|7124	JUN|SNCA|TNF	-2.88084	0	21	0	0	-7.97803	114.436
1	-4.49939	GO:0019216	M1	1	0	GO Biological Processes	19	regulation of lipid metabolic process	19_GO:0008152 metabolic process	-4.49939	13.5027	7.65525	30211	339	33	5	15.1515	6.24156	301|5743|6622|7040|7124	ANXA1|PTGS2|SNCA|TGFB1|TNF	-2.86179	0	21	0	0	-7.97803	114.436
1	-4.47142	GO:0051345	M1	1	0	GO Biological Processes	19	positive regulation of hydrolase activity	19_GO:0065007 biological regulation	-4.47142	9.51977	6.83294	30211	577	33	6	18.1818	6.71408	841|1956|2932|4609|6622|7124	CASP8|EGFR|GSK3B|MYC|SNCA|TNF	-2.8435	0	21	0	0	-7.97803	114.436
1	-4.41822	GO:0010950	M1	1	0	GO Biological Processes	19	positive regulation of endopeptidase activity	19_GO:0048518 positive regulation of biological process	-4.41822	21.0456	8.76906	30211	174	33	4	12.1212	5.68144	841|4609|6622|7124	CASP8|MYC|SNCA|TNF	-2.79506	0	21	0	0	-7.97803	114.436
1	-4.40958	GO:0046324	M1	1	0	GO Biological Processes	19	regulation of glucose import	19_GO:0051179 localization	-4.40958	45.7742	11.48	30211	60	33	3	9.09091	5.00438	4609|4780|7124	MYC|NFE2L2|TNF	-2.78995	0	21	0	0	-7.97803	114.436
1	-4.36946	GO:0050767	M1	1	0	GO Biological Processes	19	regulation of neurogenesis	19_GO:0032502 developmental process	-4.36946	12.6798	7.38254	30211	361	33	5	15.1515	6.24156	4609|5728|7040|7124|7157	MYC|PTEN|TGFB1|TNF|TP53	-2.7545	0	21	0	0	-7.97803	114.436
1	-4.32539	GO:0014015	M1	1	0	GO Biological Processes	19	positive regulation of gliogenesis	19_GO:0032502 developmental process	-4.32539	42.9134	11.0996	30211	64	33	3	9.09091	5.00438	4609|7040|7124	MYC|TGFB1|TNF	-2.7162	0	21	0	0	-7.97803	114.436
1	-4.26574	GO:0071300	M1	1	0	GO Biological Processes	19	cellular response to retinoic acid	19_GO:0050896 response to stimulus	-4.26574	40.9919	10.8367	30211	67	33	3	9.09091	5.00438	2932|4609|7124	GSK3B|MYC|TNF	-2.66897	0	21	0	0	-7.97803	114.436
1	-4.25179	GO:0010952	M1	1	0	GO Biological Processes	19	positive regulation of peptidase activity	19_GO:0048518 positive regulation of biological process	-4.25179	19.0726	8.30731	30211	192	33	4	12.1212	5.68144	841|4609|6622|7124	CASP8|MYC|SNCA|TNF	-2.65835	0	21	0	0	-7.97803	114.436
1	-4.19036	GO:0006970	M1	1	0	GO Biological Processes	19	response to osmotic stress	19_GO:0050896 response to stimulus	-4.19036	38.6825	10.512	30211	71	33	3	9.09091	5.00438	5743|7124|7157	PTGS2|TNF|TP53	-2.6035	0	21	0	0	-7.97803	114.436
1	-4.08514	GO:0006919	M1	1	0	GO Biological Processes	19	activation of cysteine-type endopeptidase activity involved in apoptotic process	19_GO:0048518 positive regulation of biological process	-4.08514	35.6682	10.0725	30211	77	33	3	9.09091	5.00438	841|6622|7124	CASP8|SNCA|TNF	-2.51536	0	21	0	0	-7.97803	114.436
1	-4.08514	GO:0043154	M1	1	0	GO Biological Processes	19	negative regulation of cysteine-type endopeptidase activity involved in apoptotic process	19_GO:0048519 negative regulation of biological process	-4.08514	35.6682	10.0725	30211	77	33	3	9.09091	5.00438	5743|6622|7124	PTGS2|SNCA|TNF	-2.51536	0	21	0	0	-7.97803	114.436
1	-4.06843	GO:0010827	M1	1	0	GO Biological Processes	19	regulation of glucose transmembrane transport	19_GO:0051179 localization	-4.06843	35.211	10.0041	30211	78	33	3	9.09091	5.00438	4609|4780|7124	MYC|NFE2L2|TNF	-2.50385	0	21	0	0	-7.97803	114.436
1	-4.02996	GO:0052548	M1	1	0	GO Biological Processes	19	regulation of endopeptidase activity	19_GO:0008152 metabolic process	-4.02996	10.7451	6.69855	30211	426	33	5	15.1515	6.24156	841|4609|5743|6622|7124	CASP8|MYC|PTGS2|SNCA|TNF	-2.47458	0	21	0	0	-7.97803	114.436
1	-3.96875	GO:0051960	M1	1	0	GO Biological Processes	19	regulation of nervous system development	19_GO:0032502 developmental process	-3.96875	10.4269	6.57939	30211	439	33	5	15.1515	6.24156	4609|5728|7040|7124|7157	MYC|PTEN|TGFB1|TNF|TP53	-2.42041	0	21	0	0	-7.97803	114.436
1	-3.95731	GO:0046889	M1	1	0	GO Biological Processes	19	positive regulation of lipid biosynthetic process	19_GO:0048518 positive regulation of biological process	-3.95731	32.3112	9.5593	30211	85	33	3	9.09091	5.00438	301|5743|7124	ANXA1|PTGS2|TNF	-2.4149	0	21	0	0	-7.97803	114.436
1	-3.95731	GO:2000117	M1	1	0	GO Biological Processes	19	negative regulation of cysteine-type endopeptidase activity	19_GO:0048519 negative regulation of biological process	-3.95731	32.3112	9.5593	30211	85	33	3	9.09091	5.00438	5743|6622|7124	PTGS2|SNCA|TNF	-2.4149	0	21	0	0	-7.97803	114.436
1	-3.8916	GO:0052547	M1	1	0	GO Biological Processes	19	regulation of peptidase activity	19_GO:0008152 metabolic process	-3.8916	10.0382	6.4309	30211	456	33	5	15.1515	6.24156	841|4609|5743|6622|7124	CASP8|MYC|PTGS2|SNCA|TNF	-2.35601	0	21	0	0	-7.97803	114.436
1	-3.86511	GO:0005975	M1	1	0	GO Biological Processes	19	carbohydrate metabolic process	19_GO:0008152 metabolic process	-3.86511	9.90784	6.38035	30211	462	33	5	15.1515	6.24156	2932|4609|5728|6520|7124	GSK3B|MYC|PTEN|SLC3A2|TNF	-2.33337	0	21	0	0	-7.97803	114.436
1	-3.79988	GO:0045087	M1	1	0	GO Biological Processes	19	innate immune response	19_GO:0044419 biological process involved in interspecies interaction between organisms	-3.79988	7.18967	5.73035	30211	764	33	6	18.1818	6.71408	301|4609|5970|6622|7124|7157	ANXA1|MYC|RELA|SNCA|TNF|TP53	-2.27763	0	21	0	0	-7.97803	114.436
1	-3.74807	GO:0014013	M1	1	0	GO Biological Processes	19	regulation of gliogenesis	19_GO:0032502 developmental process	-3.74807	27.4645	8.76575	30211	100	33	3	9.09091	5.00438	4609|7040|7124	MYC|TGFB1|TNF	-2.24057	0	21	0	0	-7.97803	114.436
1	-3.72266	GO:0071346	M1	1	0	GO Biological Processes	19	cellular response to interferon-gamma	19_GO:0044419 biological process involved in interspecies interaction between organisms	-3.72266	26.926	8.67311	30211	102	33	3	9.09091	5.00438	4609|7124|7157	MYC|TNF|TP53	-2.22502	0	21	0	0	-7.97803	114.436
1	-3.6376	GO:0032526	M1	1	0	GO Biological Processes	19	response to retinoic acid	19_GO:0050896 response to stimulus	-3.6376	25.1968	8.36876	30211	109	33	3	9.09091	5.00438	2932|4609|7124	GSK3B|MYC|TNF	-2.14961	0	21	0	0	-7.97803	114.436
1	-3.40895	GO:0034762	M1	1	0	GO Biological Processes	19	regulation of transmembrane transport	19_GO:0051179 localization	-3.40895	7.89211	5.54217	30211	580	33	5	15.1515	6.24156	4609|4734|4780|6622|7124	MYC|NEDD4|NFE2L2|SNCA|TNF	-1.94622	0	21	0	0	-7.97803	114.436
1	-3.3279	GO:0051384	M1	1	0	GO Biological Processes	19	response to glucocorticoid	19_GO:0050896 response to stimulus	-3.3279	19.7587	7.33019	30211	139	33	3	9.09091	5.00438	301|5743|7124	ANXA1|PTGS2|TNF	-1.87327	0	21	0	0	-7.97803	114.436
1	-3.3098	GO:0034763	M1	1	0	GO Biological Processes	19	negative regulation of transmembrane transport	19_GO:0051179 localization	-3.3098	19.4784	7.27268	30211	141	33	3	9.09091	5.00438	4609|4734|7124	MYC|NEDD4|TNF	-1.85996	0	21	0	0	-7.97803	114.436
1	-3.30085	GO:0045598	M1	1	0	GO Biological Processes	19	regulation of fat cell differentiation	19_GO:0032502 developmental process	-3.30085	19.3412	7.24436	30211	142	33	3	9.09091	5.00438	5743|7040|7124	PTGS2|TGFB1|TNF	-1.85259	0	21	0	0	-7.97803	114.436
1	-3.27439	GO:0050729	M1	1	0	GO Biological Processes	19	positive regulation of inflammatory response	19_GO:0048518 positive regulation of biological process	-3.27439	18.9411	7.16113	30211	145	33	3	9.09091	5.00438	5743|6622|7124	PTGS2|SNCA|TNF	-1.83241	0	21	0	0	-7.97803	114.436
1	-3.25518	GO:0045861	M1	1	0	GO Biological Processes	19	negative regulation of proteolysis	19_GO:0048519 negative regulation of biological process	-3.25518	10.4627	5.88821	30211	350	33	4	12.1212	5.68144	5743|6622|7124|7157	PTGS2|SNCA|TNF|TP53	-1.81631	0	21	0	0	-7.97803	114.436
1	-3.17396	GO:0031960	M1	1	0	GO Biological Processes	19	response to corticosteroid	19_GO:0050896 response to stimulus	-3.17396	17.4933	6.85164	30211	157	33	3	9.09091	5.00438	301|5743|7124	ANXA1|PTGS2|TNF	-1.74048	0	21	0	0	-7.97803	114.436
1	-3.03892	GO:0008015	M1	1	0	GO Biological Processes	19	blood circulation	19_GO:0032501 multicellular organismal process	-3.03892	9.15485	5.42931	30211	400	33	4	12.1212	5.68144	3162|5743|7040|7124	HMOX1|PTGS2|TGFB1|TNF	-1.62121	0	21	0	0	-7.97803	114.436
1	-3.03749	GO:0046890	M1	1	0	GO Biological Processes	19	regulation of lipid biosynthetic process	19_GO:0008152 metabolic process	-3.03749	15.694	6.44653	30211	175	33	3	9.09091	5.00438	301|5743|7124	ANXA1|PTGS2|TNF	-1.62051	0	21	0	0	-7.97803	114.436
1	-2.9815	GO:0008217	M1	1	0	GO Biological Processes	19	regulation of blood pressure	19_GO:0032501 multicellular organismal process	-2.9815	15.0079	6.28527	30211	183	33	3	9.09091	5.00438	3162|5743|7124	HMOX1|PTGS2|TNF	-1.57326	0	21	0	0	-7.97803	114.436
1	-2.74109	GO:0050769	M1	1	0	GO Biological Processes	19	positive regulation of neurogenesis	19_GO:0032502 developmental process	-2.74109	12.3714	5.62338	30211	222	33	3	9.09091	5.00438	4609|7040|7124	MYC|TGFB1|TNF	-1.34983	0	21	0	0	-7.97803	114.436
1	-2.70869	GO:0003013	M1	1	0	GO Biological Processes	19	circulatory system process	19_GO:0032501 multicellular organismal process	-2.70869	7.44297	4.76473	30211	492	33	4	12.1212	5.68144	3162|5743|7040|7124	HMOX1|PTGS2|TGFB1|TNF	-1.3202	0	21	0	0	-7.97803	114.436
1	-2.58978	GO:0010951	M1	1	0	GO Biological Processes	19	negative regulation of endopeptidase activity	19_GO:0048519 negative regulation of biological process	-2.58978	10.942	5.23033	30211	251	33	3	9.09091	5.00438	5743|6622|7124	PTGS2|SNCA|TNF	-1.2115	0	21	0	0	-7.97803	114.436
1	-2.53721	GO:0010466	M1	1	0	GO Biological Processes	19	negative regulation of peptidase activity	19_GO:0048519 negative regulation of biological process	-2.53721	10.4827	5.09772	30211	262	33	3	9.09091	5.00438	5743|6622|7124	PTGS2|SNCA|TNF	-1.16162	0	21	0	0	-7.97803	114.436
1	-2.53255	GO:0003018	M1	1	0	GO Biological Processes	19	vascular process in circulatory system	19_GO:0032501 multicellular organismal process	-2.53255	10.4428	5.08606	30211	263	33	3	9.09091	5.00438	5743|7040|7124	PTGS2|TGFB1|TNF	-1.1583	0	21	0	0	-7.97803	114.436
1	-2.50498	GO:0051962	M1	1	0	GO Biological Processes	19	positive regulation of nervous system development	19_GO:0032502 developmental process	-2.50498	10.2099	5.01737	30211	269	33	3	9.09091	5.00438	4609|7040|7124	MYC|TGFB1|TNF	-1.13669	0	21	0	0	-7.97803	114.436
1	-2.41763	GO:0031349	M1	1	0	GO Biological Processes	19	positive regulation of defense response	19_GO:0048518 positive regulation of biological process	-2.41763	9.5033	4.80317	30211	289	33	3	9.09091	5.00438	5743|6622|7124	PTGS2|SNCA|TNF	-1.05523	0	21	0	0	-7.97803	114.436
1	-2.3845	GO:0010720	M1	1	0	GO Biological Processes	19	positive regulation of cell development	19_GO:0032502 developmental process	-2.3845	9.24732	4.72325	30211	297	33	3	9.09091	5.00438	4609|7040|7124	MYC|TGFB1|TNF	-1.0234	0	21	0	0	-7.97803	114.436
1	-2.19643	GO:0043269	M1	1	0	GO Biological Processes	19	regulation of ion transport	19_GO:0051179 localization	-2.19643	5.3459	3.8046	30211	685	33	4	12.1212	5.68144	4734|5743|6622|7124	NEDD4|PTGS2|SNCA|TNF	-0.842382	0	21	0	0	-7.97803	114.436
1	-2.0197	GO:0010959	M1	1	0	GO Biological Processes	19	regulation of metal ion transport	19_GO:0051179 localization	-2.0197	6.81502	3.8862	30211	403	33	3	9.09091	5.00438	4734|5743|6622	NEDD4|PTGS2|SNCA	-0.67572	0	21	0	0	-7.97803	114.436
1	-7.92436	GO:2000377	M1	1	0	GO Biological Processes	19	regulation of reactive oxygen species metabolic process	19_GO:0008152 metabolic process	-7.92436	37.3667	14.6159	30211	147	33	6	18.1818	6.71408	2950|4780|6622|7040|7124|7157	GSTP1|NFE2L2|SNCA|TGFB1|TNF|TP53	-5.72775	0	22	1	1	-7.92436	80.7781
1	-7.85368	GO:2000379	M1	1	0	GO Biological Processes	19	positive regulation of reactive oxygen species metabolic process	19_GO:0048518 positive regulation of biological process	-7.85368	64.4708	17.7059	30211	71	33	5	15.1515	6.24156	2950|4780|6622|7040|7157	GSTP1|NFE2L2|SNCA|TGFB1|TP53	-5.66968	0	22	0	0	-7.92436	80.7781
1	-5.15846	GO:0090322	M1	1	0	GO Biological Processes	19	regulation of superoxide metabolic process	19_GO:0008152 metabolic process	-5.15846	80.7781	15.3912	30211	34	33	3	9.09091	5.00438	2950|4780|7040	GSTP1|NFE2L2|TGFB1	-3.41686	0	22	0	0	-7.92436	80.7781
1	-7.61807	GO:0048145	M1	1	0	GO Biological Processes	19	regulation of fibroblast proliferation	19_GO:0050789 regulation of biological process	-7.61807	57.9421	16.7579	30211	79	33	5	15.1515	6.24156	1956|2950|3725|4609|7157	EGFR|GSTP1|JUN|MYC|TP53	-5.46767	0	23	1	1	-7.61807	58.4352
1	-7.36343	GO:0008283	M1	1	0	GO Biological Processes	19	cell population proliferation	19_GO:0009987 cellular process	-7.36343	14.9773	10.3044	30211	489	33	8	24.2424	7.46009	2950|3162|4609|5594|7042|7124|7157|7345	GSTP1|HMOX1|MYC|MAPK1|TGFB2|TNF|TP53|UCHL1	-5.26902	0	23	0	0	-7.61807	58.4352
1	-7.16664	GO:0032872	M1	1	0	GO Biological Processes	19	regulation of stress-activated MAPK cascade	19_GO:0023052 signaling	-7.16664	27.8828	12.5179	30211	197	33	6	18.1818	6.71408	1956|2950|4609|5594|7042|7124	EGFR|GSTP1|MYC|MAPK1|TGFB2|TNF	-5.09939	0	23	0	0	-7.61807	58.4352
1	-7.12776	GO:0070302	M1	1	0	GO Biological Processes	19	regulation of stress-activated protein kinase signaling cascade	19_GO:0023052 signaling	-7.12776	27.4645	12.4173	30211	200	33	6	18.1818	6.71408	1956|2950|4609|5594|7042|7124	EGFR|GSTP1|MYC|MAPK1|TGFB2|TNF	-5.07347	0	23	0	0	-7.61807	58.4352
1	-6.91808	GO:0051347	M1	1	0	GO Biological Processes	19	positive regulation of transferase activity	19_GO:0065007 biological regulation	-6.91808	13.1018	9.55024	30211	559	33	8	24.2424	7.46009	1956|4609|5594|5728|6622|7040|7042|7124	EGFR|MYC|MAPK1|PTEN|SNCA|TGFB1|TGFB2|TNF	-4.90051	0	23	0	0	-7.61807	58.4352
1	-6.42043	GO:0009792	M1	1	0	GO Biological Processes	19	embryo development ending in birth or egg hatching	19_GO:0032502 developmental process	-6.42043	11.2675	8.75083	30211	650	33	8	24.2424	7.46009	841|1956|2182|4609|5594|7040|7042|7157	CASP8|EGFR|ACSL4|MYC|MAPK1|TGFB1|TGFB2|TP53	-4.48788	0	23	0	0	-7.61807	58.4352
1	-6.34962	GO:0048568	M1	1	0	GO Biological Processes	19	embryonic organ development	19_GO:0032502 developmental process	-6.34962	14.3686	9.40562	30211	446	33	7	21.2121	7.11647	841|1956|5594|7040|7042|7124|7157	CASP8|EGFR|MAPK1|TGFB1|TGFB2|TNF|TP53	-4.42896	0	23	0	0	-7.61807	58.4352
1	-5.80846	GO:0000165	M1	1	0	GO Biological Processes	19	MAPK cascade	19_GO:0023052 signaling	-5.80846	25.1507	10.8064	30211	182	33	5	15.1515	6.24156	1956|4609|5594|7040|7124	EGFR|MYC|MAPK1|TGFB1|TNF	-3.95104	0	23	0	0	-7.61807	58.4352
1	-5.35884	GO:0043009	M1	1	0	GO Biological Processes	19	chordate embryonic development	19_GO:0032502 developmental process	-5.35884	10.1882	7.7007	30211	629	33	7	21.2121	7.11647	841|1956|4609|5594|7040|7042|7157	CASP8|EGFR|MYC|MAPK1|TGFB1|TGFB2|TP53	-3.57584	0	23	0	0	-7.61807	58.4352
1	-5.34713	GO:0051052	M1	1	0	GO Biological Processes	19	regulation of DNA metabolic process	19_GO:0008152 metabolic process	-5.34713	13.5963	8.42873	30211	404	33	6	18.1818	6.71408	1956|4609|5594|7040|7124|7157	EGFR|MYC|MAPK1|TGFB1|TNF|TP53	-3.56754	0	23	0	0	-7.61807	58.4352
1	-5.30208	GO:0051054	M1	1	0	GO Biological Processes	19	positive regulation of DNA metabolic process	19_GO:0048518 positive regulation of biological process	-5.30208	19.8157	9.49287	30211	231	33	5	15.1515	6.24156	1956|4609|5594|7040|7124	EGFR|MYC|MAPK1|TGFB1|TNF	-3.5375	0	23	0	0	-7.61807	58.4352
1	-5.06693	GO:2000278	M1	1	0	GO Biological Processes	19	regulation of DNA biosynthetic process	19_GO:0008152 metabolic process	-5.06693	30.7726	10.761	30211	119	33	4	12.1212	5.68144	4609|5594|7124|7157	MYC|MAPK1|TNF|TP53	-3.34892	0	23	0	0	-7.61807	58.4352
1	-4.72974	GO:0051972	M1	1	0	GO Biological Processes	19	regulation of telomerase activity	19_GO:0008152 metabolic process	-4.72974	58.4352	13.0308	30211	47	33	3	9.09091	5.00438	4609|5594|7157	MYC|MAPK1|TP53	-3.04977	0	23	0	0	-7.61807	58.4352
1	-4.72974	GO:0070849	M1	1	0	GO Biological Processes	19	response to epidermal growth factor	19_GO:0050896 response to stimulus	-4.72974	58.4352	13.0308	30211	47	33	3	9.09091	5.00438	1956|4609|5594	EGFR|MYC|MAPK1	-3.04977	0	23	0	0	-7.61807	58.4352
1	-4.70204	GO:0048146	M1	1	0	GO Biological Processes	19	positive regulation of fibroblast proliferation	19_GO:0048518 positive regulation of biological process	-4.70204	57.2178	12.8897	30211	48	33	3	9.09091	5.00438	1956|3725|4609	EGFR|JUN|MYC	-3.02875	0	23	0	0	-7.61807	58.4352
1	-4.25846	GO:0001701	M1	1	0	GO Biological Processes	19	in utero embryonic development	19_GO:0032502 developmental process	-4.25846	12.0142	7.15447	30211	381	33	5	15.1515	6.24156	841|1956|4609|5594|7157	CASP8|EGFR|MYC|MAPK1|TP53	-2.66392	0	23	0	0	-7.61807	58.4352
1	-4.1543	GO:2000573	M1	1	0	GO Biological Processes	19	positive regulation of DNA biosynthetic process	19_GO:0048518 positive regulation of biological process	-4.1543	37.6227	10.3596	30211	73	33	3	9.09091	5.00438	4609|5594|7124	MYC|MAPK1|TNF	-2.57285	0	23	0	0	-7.61807	58.4352
1	-3.97676	GO:0006974	M1	1	0	GO Biological Processes	19	cellular response to DNA damage stimulus	19_GO:0050896 response to stimulus	-3.97676	7.7474	6.01203	30211	709	33	6	18.1818	6.71408	3162|4609|4734|5594|7124|7157	HMOX1|MYC|NEDD4|MAPK1|TNF|TP53	-2.42542	0	23	0	0	-7.61807	58.4352
1	-2.61449	GO:2001020	M1	1	0	GO Biological Processes	19	regulation of response to DNA damage stimulus	19_GO:0050896 response to stimulus	-2.61449	11.1644	5.29336	30211	246	33	3	9.09091	5.00438	1956|4609|7157	EGFR|MYC|TP53	-1.23419	0	23	0	0	-7.61807	58.4352
1	-7.58078	GO:0035239	M1	1	0	GO Biological Processes	19	tube morphogenesis	19_GO:0032502 developmental process	-7.58078	12.465	9.8556	30211	661	33	9	27.2727	7.75275	841|1956|3162|3725|4609|5728|5743|7040|7042	CASP8|EGFR|HMOX1|JUN|MYC|PTEN|PTGS2|TGFB1|TGFB2	-5.43434	0	24	1	1	-7.58078	16.6452
1	-7.26918	GO:0001568	M1	1	0	GO Biological Processes	19	blood vessel development	19_GO:0032502 developmental process	-7.26918	14.5604	10.1416	30211	503	33	8	24.2424	7.46009	841|3162|3725|5594|5728|5743|7040|7042	CASP8|HMOX1|JUN|MAPK1|PTEN|PTGS2|TGFB1|TGFB2	-5.18515	0	24	0	0	-7.58078	16.6452
1	-7.1202	GO:0001944	M1	1	0	GO Biological Processes	19	vasculature development	19_GO:0032502 developmental process	-7.1202	13.9237	9.88779	30211	526	33	8	24.2424	7.46009	841|3162|3725|5594|5728|5743|7040|7042	CASP8|HMOX1|JUN|MAPK1|PTEN|PTGS2|TGFB1|TGFB2	-5.07165	0	24	0	0	-7.58078	16.6452
1	-6.5319	GO:0048514	M1	1	0	GO Biological Processes	19	blood vessel morphogenesis	19_GO:0032502 developmental process	-6.5319	15.2945	9.74346	30211	419	33	7	21.2121	7.11647	841|3162|3725|5728|5743|7040|7042	CASP8|HMOX1|JUN|PTEN|PTGS2|TGFB1|TGFB2	-4.57196	0	24	0	0	-7.58078	16.6452
1	-4.61253	GO:0001525	M1	1	0	GO Biological Processes	19	angiogenesis	19_GO:0032502 developmental process	-4.61253	14.2599	7.89799	30211	321	33	5	15.1515	6.24156	841|3162|3725|5728|5743	CASP8|HMOX1|JUN|PTEN|PTGS2	-2.9549	0	24	0	0	-7.58078	16.6452
1	-3.11138	GO:0009266	M1	1	0	GO Biological Processes	19	response to temperature stimulus	19_GO:0050896 response to stimulus	-3.11138	16.6452	6.66371	30211	165	33	3	9.09091	5.00438	841|3162|5743	CASP8|HMOX1|PTGS2	-1.68473	0	24	0	0	-7.58078	16.6452
1	-7.27963	GO:0006631	M1	1	0	GO Biological Processes	19	fatty acid metabolic process	19_GO:0008152 metabolic process	-7.27963	19.7181	11.2191	30211	325	33	7	21.2121	7.11647	246|2182|2194|2950|5743|6622|114757	ALOX15|ACSL4|FASN|GSTP1|PTGS2|SNCA|CYGB	-5.19217	0	25	1	1	-7.27963	40.6882
1	-6.83514	GO:0097237	M1	1	0	GO Biological Processes	19	cellular response to toxic substance	19_GO:0050896 response to stimulus	-6.83514	40.5082	13.9138	30211	113	33	5	15.1515	6.24156	1728|2950|5743|7124|114757	NQO1|GSTP1|PTGS2|TNF|CYGB	-4.84043	0	25	0	0	-7.27963	40.6882
1	-6.78041	GO:0009636	M1	1	0	GO Biological Processes	19	response to toxic substance	19_GO:0050896 response to stimulus	-6.78041	23.9865	11.5464	30211	229	33	6	18.1818	6.71408	1728|2950|4780|5743|7124|114757	NQO1|GSTP1|NFE2L2|PTGS2|TNF|CYGB	-4.78848	0	25	0	0	-7.27963	40.6882
1	-6.49837	GO:0098754	M1	1	0	GO Biological Processes	19	detoxification	19_GO:0098754 detoxification	-6.49837	34.6775	12.8228	30211	132	33	5	15.1515	6.24156	1728|2950|4780|5743|114757	NQO1|GSTP1|NFE2L2|PTGS2|CYGB	-4.54858	0	25	0	0	-7.27963	40.6882
1	-6.07035	GO:0032787	M1	1	0	GO Biological Processes	19	monocarboxylic acid metabolic process	19_GO:0008152 metabolic process	-6.07035	13.0517	8.90333	30211	491	33	7	21.2121	7.11647	246|2182|2194|2950|5743|6622|114757	ALOX15|ACSL4|FASN|GSTP1|PTGS2|SNCA|CYGB	-4.18787	0	25	0	0	-7.27963	40.6882
1	-5.54969	GO:0098869	M1	1	0	GO Biological Processes	19	cellular oxidant detoxification	19_GO:0098754 detoxification	-5.54969	40.6882	12.4691	30211	90	33	4	12.1212	5.68144	1728|2950|5743|114757	NQO1|GSTP1|PTGS2|CYGB	-3.74925	0	25	0	0	-7.27963	40.6882
1	-5.28267	GO:1990748	M1	1	0	GO Biological Processes	19	cellular detoxification	19_GO:0098754 detoxification	-5.28267	34.8756	11.4985	30211	105	33	4	12.1212	5.68144	1728|2950|5743|114757	NQO1|GSTP1|PTGS2|CYGB	-3.52391	0	25	0	0	-7.27963	40.6882
1	-5.18677	GO:0001676	M1	1	0	GO Biological Processes	19	long-chain fatty acid metabolic process	19_GO:0008152 metabolic process	-5.18677	32.9904	11.1657	30211	111	33	4	12.1212	5.68144	246|2182|2950|5743	ALOX15|ACSL4|GSTP1|PTGS2	-3.43985	0	25	0	0	-7.27963	40.6882
1	-5.08144	GO:0006633	M1	1	0	GO Biological Processes	19	fatty acid biosynthetic process	19_GO:0008152 metabolic process	-5.08144	31.0334	10.8094	30211	118	33	4	12.1212	5.68144	246|2194|2950|5743	ALOX15|FASN|GSTP1|PTGS2	-3.359	0	25	0	0	-7.27963	40.6882
1	-4.96593	GO:0001503	M1	1	0	GO Biological Processes	19	ossification	19_GO:0032501 multicellular organismal process	-4.96593	16.8909	8.68947	30211	271	33	5	15.1515	6.24156	246|1956|2194|5743|7040	ALOX15|EGFR|FASN|PTGS2|TGFB1	-3.25666	0	25	0	0	-7.27963	40.6882
1	-4.55001	GO:0072330	M1	1	0	GO Biological Processes	19	monocarboxylic acid biosynthetic process	19_GO:0008152 metabolic process	-4.55001	22.745	9.14822	30211	161	33	4	12.1212	5.68144	246|2194|2950|5743	ALOX15|FASN|GSTP1|PTGS2	-2.90251	0	25	0	0	-7.27963	40.6882
1	-3.74418	GO:0046394	M1	1	0	GO Biological Processes	19	carboxylic acid biosynthetic process	19_GO:0008152 metabolic process	-3.74418	14.0844	7.00683	30211	260	33	4	12.1212	5.68144	246|2194|2950|5743	ALOX15|FASN|GSTP1|PTGS2	-2.23759	0	25	0	0	-7.27963	40.6882
1	-3.73146	GO:0016053	M1	1	0	GO Biological Processes	19	organic acid biosynthetic process	19_GO:0008152 metabolic process	-3.73146	13.9769	6.97616	30211	262	33	4	12.1212	5.68144	246|2194|2950|5743	ALOX15|FASN|GSTP1|PTGS2	-2.22937	0	25	0	0	-7.27963	40.6882
1	-3.71014	GO:0033559	M1	1	0	GO Biological Processes	19	unsaturated fatty acid metabolic process	19_GO:0008152 metabolic process	-3.71014	26.6646	8.62779	30211	103	33	3	9.09091	5.00438	246|2950|5743	ALOX15|GSTP1|PTGS2	-2.21516	0	25	0	0	-7.27963	40.6882
1	-3.61434	GO:0006690	M1	1	0	GO Biological Processes	19	icosanoid metabolic process	19_GO:0008152 metabolic process	-3.61434	24.7428	8.28701	30211	111	33	3	9.09091	5.00438	246|2950|5743	ALOX15|GSTP1|PTGS2	-2.12894	0	25	0	0	-7.27963	40.6882
1	-3.44349	GO:0008610	M1	1	0	GO Biological Processes	19	lipid biosynthetic process	19_GO:0008152 metabolic process	-3.44349	8.03057	5.60362	30211	570	33	5	15.1515	6.24156	246|2194|2950|5728|5743	ALOX15|FASN|GSTP1|PTEN|PTGS2	-1.97664	0	25	0	0	-7.27963	40.6882
1	-3.29196	GO:0007584	M1	1	0	GO Biological Processes	19	response to nutrient	19_GO:0050896 response to stimulus	-3.29196	19.206	7.21634	30211	143	33	3	9.09091	5.00438	1728|3162|5743	NQO1|HMOX1|PTGS2	-1.84528	0	25	0	0	-7.27963	40.6882
1	-3.28314	GO:0120254	M1	1	0	GO Biological Processes	19	olefinic compound metabolic process	19_GO:0008152 metabolic process	-3.28314	19.0726	7.18859	30211	144	33	3	9.09091	5.00438	246|2950|5743	ALOX15|GSTP1|PTGS2	-1.83882	0	25	0	0	-7.27963	40.6882
1	-2.99525	GO:0009743	M1	1	0	GO Biological Processes	19	response to carbohydrate	19_GO:0050896 response to stimulus	-2.99525	15.1738	6.32462	30211	181	33	3	9.09091	5.00438	1728|4609|5743	NQO1|MYC|PTGS2	-1.58267	0	25	0	0	-7.27963	40.6882
1	-2.9491	GO:0044283	M1	1	0	GO Biological Processes	19	small molecule biosynthetic process	19_GO:0008152 metabolic process	-2.9491	8.65707	5.24444	30211	423	33	4	12.1212	5.68144	246|2194|2950|5743	ALOX15|FASN|GSTP1|PTGS2	-1.54446	0	25	0	0	-7.27963	40.6882
1	-7.23651	GO:1904035	M1	1	0	GO Biological Processes	19	regulation of epithelial cell apoptotic process	19_GO:0050789 regulation of biological process	-7.23651	48.696	15.3154	30211	94	33	5	15.1515	6.24156	3162|4780|5925|7124|7128	HMOX1|NFE2L2|RB1|TNF|TNFAIP3	-5.15589	0	26	1	1	-7.23651	88.5953
1	-6.58148	GO:1902041	M1	1	0	GO Biological Processes	19	regulation of extrinsic apoptotic signaling pathway via death domain receptors	19_GO:0023052 signaling	-6.58148	73.2388	16.9052	30211	50	33	4	12.1212	5.68144	2932|3162|5728|7128	GSK3B|HMOX1|PTEN|TNFAIP3	-4.61896	0	26	0	0	-7.23651	88.5953
1	-6.51191	GO:1904036	M1	1	0	GO Biological Processes	19	negative regulation of epithelial cell apoptotic process	19_GO:0048519 negative regulation of biological process	-6.51191	70.4219	16.5683	30211	52	33	4	12.1212	5.68144	3162|4780|5925|7128	HMOX1|NFE2L2|RB1|TNFAIP3	-4.55961	0	26	0	0	-7.23651	88.5953
1	-5.28175	GO:1902042	M1	1	0	GO Biological Processes	19	negative regulation of extrinsic apoptotic signaling pathway via death domain receptors	19_GO:0023052 signaling	-5.28175	88.5953	16.1358	30211	31	33	3	9.09091	5.00438	2932|3162|7128	GSK3B|HMOX1|TNFAIP3	-3.52391	0	26	0	0	-7.23651	88.5953
1	-4.37025	GO:0050777	M1	1	0	GO Biological Processes	19	negative regulation of immune response	19_GO:0002376 immune system process	-4.37025	20.4578	8.63405	30211	179	33	4	12.1212	5.68144	246|301|3162|7128	ALOX15|ANXA1|HMOX1|TNFAIP3	-2.7545	0	26	0	0	-7.23651	88.5953
1	-4.1543	GO:0048662	M1	1	0	GO Biological Processes	19	negative regulation of smooth muscle cell proliferation	19_GO:0048519 negative regulation of biological process	-4.1543	37.6227	10.3596	30211	73	33	3	9.09091	5.00438	3162|5728|7128	HMOX1|PTEN|TNFAIP3	-2.57285	0	26	0	0	-7.23651	88.5953
1	-4.05366	GO:0050866	M1	1	0	GO Biological Processes	19	negative regulation of cell activation	19_GO:0048519 negative regulation of biological process	-4.05366	16.9534	7.78114	30211	216	33	4	12.1212	5.68144	301|3162|7128|114757	ANXA1|HMOX1|TNFAIP3|CYGB	-2.4925	0	26	0	0	-7.23651	88.5953
1	-3.90546	GO:0048872	M1	1	0	GO Biological Processes	19	homeostasis of number of cells	19_GO:0065007 biological regulation	-3.90546	15.5167	7.4034	30211	236	33	4	12.1212	5.68144	301|3162|5925|7128	ANXA1|HMOX1|RB1|TNFAIP3	-2.3689	0	26	0	0	-7.23651	88.5953
1	-3.51478	GO:0002262	M1	1	0	GO Biological Processes	19	myeloid cell homeostasis	19_GO:0002376 immune system process	-3.51478	22.8871	7.94416	30211	120	33	3	9.09091	5.00438	301|3162|5925	ANXA1|HMOX1|RB1	-2.0396	0	26	0	0	-7.23651	88.5953
1	-2.93458	GO:0043433	M1	1	0	GO Biological Processes	19	negative regulation of DNA-binding transcription factor activity	19_GO:0008152 metabolic process	-2.93458	14.455	6.15228	30211	190	33	3	9.09091	5.00438	3162|5925|7128	HMOX1|RB1|TNFAIP3	-1.53208	0	26	0	0	-7.23651	88.5953
1	-2.91503	GO:0002695	M1	1	0	GO Biological Processes	19	negative regulation of leukocyte activation	19_GO:0002376 immune system process	-2.91503	14.2303	6.09741	30211	193	33	3	9.09091	5.00438	301|3162|7128	ANXA1|HMOX1|TNFAIP3	-1.51395	0	26	0	0	-7.23651	88.5953
1	-7.18113	GO:0010506	M1	1	0	GO Biological Processes	19	regulation of autophagy	19_GO:0008152 metabolic process	-7.18113	19.0726	11.016	30211	336	33	7	21.2121	7.11647	2932|3162|3315|4734|6622|7157|7345	GSK3B|HMOX1|HSPB1|NEDD4|SNCA|TP53|UCHL1	-5.11057	0	27	1	1	-7.18113	40.9919
1	-4.58199	GO:0016241	M1	1	0	GO Biological Processes	19	regulation of macroautophagy	19_GO:0008152 metabolic process	-4.58199	23.1768	9.24211	30211	158	33	4	12.1212	5.68144	3162|4734|7157|7345	HMOX1|NEDD4|TP53|UCHL1	-2.92946	0	27	0	0	-7.18113	40.9919
1	-4.26574	GO:0008630	M1	1	0	GO Biological Processes	19	intrinsic apoptotic signaling pathway in response to DNA damage	19_GO:0023052 signaling	-4.26574	40.9919	10.8367	30211	67	33	3	9.09091	5.00438	3162|7124|7157	HMOX1|TNF|TP53	-2.66897	0	27	0	0	-7.18113	40.9919
1	-4.01959	GO:0010660	M1	1	0	GO Biological Processes	19	regulation of muscle cell apoptotic process	19_GO:0050789 regulation of biological process	-4.01959	33.9068	9.80655	30211	81	33	3	9.09091	5.00438	3162|4780|7157	HMOX1|NFE2L2|TP53	-2.46624	0	27	0	0	-7.18113	40.9919
1	-3.95731	GO:0010507	M1	1	0	GO Biological Processes	19	negative regulation of autophagy	19_GO:0048519 negative regulation of biological process	-3.95731	32.3112	9.5593	30211	85	33	3	9.09091	5.00438	3162|6622|7157	HMOX1|SNCA|TP53	-2.4149	0	27	0	0	-7.18113	40.9919
1	-3.25706	GO:0097193	M1	1	0	GO Biological Processes	19	intrinsic apoptotic signaling pathway	19_GO:0023052 signaling	-3.25706	18.6834	7.10702	30211	147	33	3	9.09091	5.00438	3162|7124|7157	HMOX1|TNF|TP53	-1.81742	0	27	0	0	-7.18113	40.9919
1	-2.53255	GO:0031330	M1	1	0	GO Biological Processes	19	negative regulation of cellular catabolic process	19_GO:0048519 negative regulation of biological process	-2.53255	10.4428	5.08606	30211	263	33	3	9.09091	5.00438	3162|6622|7157	HMOX1|SNCA|TP53	-1.1583	0	27	0	0	-7.18113	40.9919
1	-7.1196	GO:0071276	M1	1	0	GO Biological Processes	19	cellular response to cadmium ion	19_GO:0050896 response to stimulus	-7.1196	98.9713	19.7183	30211	37	33	4	12.1212	5.68144	1956|3162|3725|5594	EGFR|HMOX1|JUN|MAPK1	-5.07165	0	28	1	1	-7.1196	98.9713
1	-6.28865	GO:0046686	M1	1	0	GO Biological Processes	19	response to cadmium ion	19_GO:0050896 response to stimulus	-6.28865	62.0668	15.526	30211	59	33	4	12.1212	5.68144	1956|3162|3725|5594	EGFR|HMOX1|JUN|MAPK1	-4.37266	0	28	0	0	-7.1196	98.9713
1	-5.86088	GO:0045787	M1	1	0	GO Biological Processes	19	positive regulation of cell cycle	19_GO:0048518 positive regulation of biological process	-5.86088	16.6958	9.46592	30211	329	33	6	18.1818	6.71408	301|1956|4609|5925|7042|7124	ANXA1|EGFR|MYC|RB1|TGFB2|TNF	-3.99733	0	28	0	0	-7.1196	98.9713
1	-5.51153	GO:0042303	M1	1	0	GO Biological Processes	19	molting cycle	19_GO:0032501 multicellular organismal process	-5.51153	39.8037	12.3263	30211	92	33	4	12.1212	5.68144	1956|5743|5970|7042	EGFR|PTGS2|RELA|TGFB2	-3.7164	0	28	0	0	-7.1196	98.9713
1	-5.51153	GO:0042633	M1	1	0	GO Biological Processes	19	hair cycle	19_GO:0032501 multicellular organismal process	-5.51153	39.8037	12.3263	30211	92	33	4	12.1212	5.68144	1956|5743|5970|7042	EGFR|PTGS2|RELA|TGFB2	-3.7164	0	28	0	0	-7.1196	98.9713
1	-4.95516	GO:0048565	M1	1	0	GO Biological Processes	19	digestive tract development	19_GO:0032502 developmental process	-4.95516	28.8342	10.3944	30211	127	33	4	12.1212	5.68144	1956|5925|7042|7124	EGFR|RB1|TGFB2|TNF	-3.24734	0	28	0	0	-7.1196	98.9713
1	-4.80052	GO:0055123	M1	1	0	GO Biological Processes	19	digestive system development	19_GO:0032502 developmental process	-4.80052	26.3449	9.90384	30211	139	33	4	12.1212	5.68144	1956|5925|7042|7124	EGFR|RB1|TGFB2|TNF	-3.10962	0	28	0	0	-7.1196	98.9713
1	-4.11924	GO:0001942	M1	1	0	GO Biological Processes	19	hair follicle development	19_GO:0032502 developmental process	-4.11924	36.6194	10.2132	30211	75	33	3	9.09091	5.00438	1956|5970|7042	EGFR|RELA|TGFB2	-2.54313	0	28	0	0	-7.1196	98.9713
1	-4.05194	GO:0022404	M1	1	0	GO Biological Processes	19	molting cycle process	19_GO:0032501 multicellular organismal process	-4.05194	34.7652	9.93703	30211	79	33	3	9.09091	5.00438	1956|5970|7042	EGFR|RELA|TGFB2	-2.4925	0	28	0	0	-7.1196	98.9713
1	-4.05194	GO:0022405	M1	1	0	GO Biological Processes	19	hair cycle process	19_GO:0032501 multicellular organismal process	-4.05194	34.7652	9.93703	30211	79	33	3	9.09091	5.00438	1956|5970|7042	EGFR|RELA|TGFB2	-2.4925	0	28	0	0	-7.1196	98.9713
1	-4.05194	GO:0098773	M1	1	0	GO Biological Processes	19	skin epidermis development	19_GO:0032502 developmental process	-4.05194	34.7652	9.93703	30211	79	33	3	9.09091	5.00438	1956|5970|7042	EGFR|RELA|TGFB2	-2.4925	0	28	0	0	-7.1196	98.9713
1	-3.91255	GO:0043588	M1	1	0	GO Biological Processes	19	skin development	19_GO:0032502 developmental process	-3.91255	15.5827	7.42118	30211	235	33	4	12.1212	5.68144	301|1956|5970|7042	ANXA1|EGFR|RELA|TGFB2	-2.37502	0	28	0	0	-7.1196	98.9713
1	-3.82948	GO:0090068	M1	1	0	GO Biological Processes	19	positive regulation of cell cycle process	19_GO:0048518 positive regulation of biological process	-3.82948	14.8257	7.21476	30211	247	33	4	12.1212	5.68144	301|1956|5925|7124	ANXA1|EGFR|RB1|TNF	-2.30157	0	28	0	0	-7.1196	98.9713
1	-3.74807	GO:1901992	M1	1	0	GO Biological Processes	19	positive regulation of mitotic cell cycle phase transition	19_GO:0048518 positive regulation of biological process	-3.74807	27.4645	8.76575	30211	100	33	3	9.09091	5.00438	301|1956|5925	ANXA1|EGFR|RB1	-2.24057	0	28	0	0	-7.1196	98.9713
1	-3.62138	GO:0008544	M1	1	0	GO Biological Processes	19	epidermis development	19_GO:0032502 developmental process	-3.62138	13.0784	6.71449	30211	280	33	4	12.1212	5.68144	301|1956|5970|7042	ANXA1|EGFR|RELA|TGFB2	-2.13512	0	28	0	0	-7.1196	98.9713
1	-3.4833	GO:1901989	M1	1	0	GO Biological Processes	19	positive regulation of cell cycle phase transition	19_GO:0048518 positive regulation of biological process	-3.4833	22.3289	7.83811	30211	123	33	3	9.09091	5.00438	301|1956|5925	ANXA1|EGFR|RB1	-2.01231	0	28	0	0	-7.1196	98.9713
1	-3.43258	GO:0045931	M1	1	0	GO Biological Processes	19	positive regulation of mitotic cell cycle	19_GO:0048518 positive regulation of biological process	-3.43258	21.4567	7.66949	30211	128	33	3	9.09091	5.00438	301|1956|5925	ANXA1|EGFR|RB1	-1.96821	0	28	0	0	-7.1196	98.9713
1	-3.11628	GO:0000902	M1	1	0	GO Biological Processes	19	cell morphogenesis	19_GO:0032502 developmental process	-3.11628	6.80152	5.03322	30211	673	33	5	15.1515	6.24156	1956|5728|5925|7042|7345	EGFR|PTEN|RB1|TGFB2|UCHL1	-1.68812	0	28	0	0	-7.1196	98.9713
1	-2.63465	GO:0044403	M1	1	0	GO Biological Processes	19	biological process involved in symbiotic interaction	19_GO:0044419 biological process involved in interspecies interaction between organisms	-2.63465	11.349	5.34511	30211	242	33	3	9.09091	5.00438	1956|3725|6520	EGFR|JUN|SLC3A2	-1.25232	0	28	0	0	-7.1196	98.9713
1	-2.531	GO:0007423	M1	1	0	GO Biological Processes	19	sensory organ development	19_GO:0032502 developmental process	-2.531	6.64599	4.423	30211	551	33	4	12.1212	5.68144	1956|3725|5594|7042	EGFR|JUN|MAPK1|TGFB2	-1.15741	0	28	0	0	-7.1196	98.9713
1	-2.30194	GO:0043010	M1	1	0	GO Biological Processes	19	camera-type eye development	19_GO:0032502 developmental process	-2.30194	8.63665	4.52709	30211	318	33	3	9.09091	5.00438	1956|3725|7042	EGFR|JUN|TGFB2	-0.944701	0	28	0	0	-7.1196	98.9713
1	-2.14016	GO:0001654	M1	1	0	GO Biological Processes	19	eye development	19_GO:0032502 developmental process	-2.14016	7.5452	4.15442	30211	364	33	3	9.09091	5.00438	1956|3725|7042	EGFR|JUN|TGFB2	-0.790546	0	28	0	0	-7.1196	98.9713
1	-2.12716	GO:0150063	M1	1	0	GO Biological Processes	19	visual system development	19_GO:0032502 developmental process	-2.12716	7.46319	4.12512	30211	368	33	3	9.09091	5.00438	1956|3725|7042	EGFR|JUN|TGFB2	-0.77818	0	28	0	0	-7.1196	98.9713
1	-2.10796	GO:0048880	M1	1	0	GO Biological Processes	19	sensory system development	19_GO:0032502 developmental process	-2.10796	7.34346	4.08199	30211	374	33	3	9.09091	5.00438	1956|3725|7042	EGFR|JUN|TGFB2	-0.759604	0	28	0	0	-7.1196	98.9713
1	-6.90647	GO:0034976	M1	1	0	GO Biological Processes	19	response to endoplasmic reticulum stress	19_GO:0050896 response to stimulus	-6.90647	25.1968	11.8567	30211	218	33	6	18.1818	6.71408	246|2932|3309|3725|4780|7157	ALOX15|GSK3B|HSPA5|JUN|NFE2L2|TP53	-4.89299	0	29	1	1	-6.90647	32.6959
1	-4.74013	GO:0051592	M1	1	0	GO Biological Processes	19	response to calcium ion	19_GO:0050896 response to stimulus	-4.74013	25.4301	9.71738	30211	144	33	4	12.1212	5.68144	246|3309|3725|4734	ALOX15|HSPA5|JUN|NEDD4	-3.05609	0	29	0	0	-6.90647	32.6959
1	-3.97259	GO:0071277	M1	1	0	GO Biological Processes	19	cellular response to calcium ion	19_GO:0050896 response to stimulus	-3.97259	32.6959	9.61948	30211	84	33	3	9.09091	5.00438	246|3309|3725	ALOX15|HSPA5|JUN	-2.42325	0	29	0	0	-6.90647	32.6959
1	-6.61736	GO:0035094	M1	1	0	GO Biological Processes	19	response to nicotine	19_GO:0050896 response to stimulus	-6.61736	74.7335	17.0813	30211	49	33	4	12.1212	5.68144	3162|5594|5970|7124	HMOX1|MAPK1|RELA|TNF	-4.64701	0	30	1	1	-6.61736	74.7335
1	-5.91016	GO:0030155	M1	1	0	GO Biological Processes	19	regulation of cell adhesion	19_GO:0022610 biological adhesion	-5.91016	9.63668	7.97427	30211	760	33	8	24.2424	7.46009	246|301|2932|5728|5970|7040|7042|7124	ALOX15|ANXA1|GSK3B|PTEN|RELA|TGFB1|TGFB2|TNF	-4.04248	0	30	0	0	-6.61736	74.7335
1	-5.46387	GO:0042063	M1	1	0	GO Biological Processes	19	gliogenesis	19_GO:0032502 developmental process	-5.46387	21.3898	9.89849	30211	214	33	5	15.1515	6.24156	301|5594|5728|7042|7124	ANXA1|MAPK1|PTEN|TGFB2|TNF	-3.67224	0	30	0	0	-6.61736	74.7335
1	-5.10193	GO:0045785	M1	1	0	GO Biological Processes	19	positive regulation of cell adhesion	19_GO:0022610 biological adhesion	-5.10193	12.3159	7.96145	30211	446	33	6	18.1818	6.71408	246|301|2932|5970|7042|7124	ALOX15|ANXA1|GSK3B|RELA|TGFB2|TNF	-3.37799	0	30	0	0	-6.61736	74.7335
1	-4.67492	GO:0035924	M1	1	0	GO Biological Processes	19	cellular response to vascular endothelial growth factor stimulus	19_GO:0050896 response to stimulus	-4.67492	56.0501	12.753	30211	49	33	3	9.09091	5.00438	301|3315|5970	ANXA1|HSPB1|RELA	-3.0056	0	30	0	0	-6.61736	74.7335
1	-4.54834	GO:0050778	M1	1	0	GO Biological Processes	19	positive regulation of immune response	19_GO:0002376 immune system process	-4.54834	9.82631	6.96539	30211	559	33	6	18.1818	6.71408	301|5594|5970|7040|7042|7124	ANXA1|MAPK1|RELA|TGFB1|TGFB2|TNF	-2.90209	0	30	0	0	-6.61736	74.7335
1	-4.49977	GO:0033209	M1	1	0	GO Biological Processes	19	tumor necrosis factor-mediated signaling pathway	19_GO:0023052 signaling	-4.49977	49.0438	11.8998	30211	56	33	3	9.09091	5.00438	5970|7124|7157	RELA|TNF|TP53	-2.86179	0	30	0	0	-6.61736	74.7335
1	-4.0382	GO:0002685	M1	1	0	GO Biological Processes	19	regulation of leukocyte migration	19_GO:0040011 locomotion	-4.0382	16.7979	7.74113	30211	218	33	4	12.1212	5.68144	301|3162|5594|7124	ANXA1|HMOX1|MAPK1|TNF	-2.47978	0	30	0	0	-6.61736	74.7335
1	-3.88359	GO:0050673	M1	1	0	GO Biological Processes	19	epithelial cell proliferation	19_GO:0009987 cellular process	-3.88359	30.5162	9.27328	30211	90	33	3	9.09091	5.00438	3162|5594|7124	HMOX1|MAPK1|TNF	-2.34897	0	30	0	0	-6.61736	74.7335
1	-3.72266	GO:0032677	M1	1	0	GO Biological Processes	19	regulation of interleukin-8 production	19_GO:0032501 multicellular organismal process	-3.72266	26.926	8.67311	30211	102	33	3	9.09091	5.00438	301|5970|7124	ANXA1|RELA|TNF	-2.22502	0	30	0	0	-6.61736	74.7335
1	-3.57731	GO:0098609	M1	1	0	GO Biological Processes	19	cell-cell adhesion	19_GO:0022610 biological adhesion	-3.57731	8.58804	5.84471	30211	533	33	5	15.1515	6.24156	301|1956|3315|7042|7124	ANXA1|EGFR|HSPB1|TGFB2|TNF	-2.09619	0	30	0	0	-6.61736	74.7335
1	-3.09624	GO:0010001	M1	1	0	GO Biological Processes	19	glial cell differentiation	19_GO:0032502 developmental process	-3.09624	16.4458	6.61878	30211	167	33	3	9.09091	5.00438	5594|5728|7124	MAPK1|PTEN|TNF	-1.67333	0	30	0	0	-6.61736	74.7335
1	-3.09624	GO:0034250	M1	1	0	GO Biological Processes	19	positive regulation of cellular amide metabolic process	19_GO:0048518 positive regulation of biological process	-3.09624	16.4458	6.61878	30211	167	33	3	9.09091	5.00438	4780|5970|7124	NFE2L2|RELA|TNF	-1.67333	0	30	0	0	-6.61736	74.7335
1	-2.82914	GO:0022407	M1	1	0	GO Biological Processes	19	regulation of cell-cell adhesion	19_GO:0022610 biological adhesion	-2.82914	8.03057	5.00242	30211	456	33	4	12.1212	5.68144	301|5970|7040|7124	ANXA1|RELA|TGFB1|TNF	-1.43089	0	30	0	0	-6.61736	74.7335
1	-2.69198	GO:0046883	M1	1	0	GO Biological Processes	19	regulation of hormone secretion	19_GO:0023052 signaling	-2.69198	11.8894	5.49391	30211	231	33	3	9.09091	5.00438	301|2182|7124	ANXA1|ACSL4|TNF	-1.30692	0	30	0	0	-6.61736	74.7335
1	-2.68665	GO:0050900	M1	1	0	GO Biological Processes	19	leukocyte migration	19_GO:0040011 locomotion	-2.68665	11.8382	5.47997	30211	232	33	3	9.09091	5.00438	301|7042|7124	ANXA1|TGFB2|TNF	-1.30228	0	30	0	0	-6.61736	74.7335
1	-2.6195	GO:1903039	M1	1	0	GO Biological Processes	19	positive regulation of leukocyte cell-cell adhesion	19_GO:0022610 biological adhesion	-2.6195	11.21	5.30618	30211	245	33	3	9.09091	5.00438	301|5970|7124	ANXA1|RELA|TNF	-1.23852	0	30	0	0	-6.61736	74.7335
1	-2.52791	GO:0051091	M1	1	0	GO Biological Processes	19	positive regulation of DNA-binding transcription factor activity	19_GO:0008152 metabolic process	-2.52791	10.4032	5.07446	30211	264	33	3	9.09091	5.00438	5728|5970|7124	PTEN|RELA|TNF	-1.15499	0	30	0	0	-6.61736	74.7335
1	-2.40926	GO:0022409	M1	1	0	GO Biological Processes	19	positive regulation of cell-cell adhesion	19_GO:0022610 biological adhesion	-2.40926	9.43799	4.7829	30211	291	33	3	9.09091	5.00438	301|5970|7124	ANXA1|RELA|TNF	-1.0475	0	30	0	0	-6.61736	74.7335
1	-2.20758	GO:1903037	M1	1	0	GO Biological Processes	19	regulation of leukocyte cell-cell adhesion	19_GO:0022610 biological adhesion	-2.20758	7.98388	4.30792	30211	344	33	3	9.09091	5.00438	301|5970|7124	ANXA1|RELA|TNF	-0.852898	0	30	0	0	-6.61736	74.7335
1	-2.18011	GO:0019221	M1	1	0	GO Biological Processes	19	cytokine-mediated signaling pathway	19_GO:0023052 signaling	-2.18011	7.80243	4.24507	30211	352	33	3	9.09091	5.00438	5970|7124|7157	RELA|TNF|TP53	-0.828602	0	30	0	0	-6.61736	74.7335
1	-6.38893	GO:0048511	M1	1	0	GO Biological Processes	19	rhythmic process	19_GO:0048511 rhythmic process	-6.38893	20.5727	10.6228	30211	267	33	6	18.1818	6.71408	2932|3309|5728|7042|7124|7157	GSK3B|HSPA5|PTEN|TGFB2|TNF|TP53	-4.46117	0	31	1	1	-6.38893	32.3112
1	-6.15422	GO:0007346	M1	1	0	GO Biological Processes	19	regulation of mitotic cell cycle	19_GO:0050789 regulation of biological process	-6.15422	13.4348	9.05228	30211	477	33	7	21.2121	7.11647	301|1956|4609|5728|5925|7124|7157	ANXA1|EGFR|MYC|PTEN|RB1|TNF|TP53	-4.25771	0	31	0	0	-6.38893	32.3112
1	-6.08416	GO:2000045	M1	1	0	GO Biological Processes	19	regulation of G1/S transition of mitotic cell cycle	19_GO:0050789 regulation of biological process	-6.08416	28.6089	11.5789	30211	160	33	5	15.1515	6.24156	301|1956|5728|5925|7157	ANXA1|EGFR|PTEN|RB1|TP53	-4.19519	0	31	0	0	-6.38893	32.3112
1	-5.73927	GO:1902806	M1	1	0	GO Biological Processes	19	regulation of cell cycle G1/S phase transition	19_GO:0050789 regulation of biological process	-5.73927	24.348	10.6191	30211	188	33	5	15.1515	6.24156	301|1956|5728|5925|7157	ANXA1|EGFR|PTEN|RB1|TP53	-3.89583	0	31	0	0	-6.38893	32.3112
1	-5.10454	GO:0010564	M1	1	0	GO Biological Processes	19	regulation of cell cycle process	19_GO:0050789 regulation of biological process	-5.10454	9.31453	7.29522	30211	688	33	7	21.2121	7.11647	301|1956|4609|5728|5925|7124|7157	ANXA1|EGFR|MYC|PTEN|RB1|TNF|TP53	-3.37911	0	31	0	0	-6.38893	32.3112
1	-4.87603	GO:0007623	M1	1	0	GO Biological Processes	19	circadian rhythm	19_GO:0048511 rhythmic process	-4.87603	27.5334	10.141	30211	133	33	4	12.1212	5.68144	2932|5728|7124|7157	GSK3B|PTEN|TNF|TP53	-3.17675	0	31	0	0	-6.38893	32.3112
1	-4.61253	GO:1901990	M1	1	0	GO Biological Processes	19	regulation of mitotic cell cycle phase transition	19_GO:0050789 regulation of biological process	-4.61253	14.2599	7.89799	30211	321	33	5	15.1515	6.24156	301|1956|5728|5925|7157	ANXA1|EGFR|PTEN|RB1|TP53	-2.9549	0	31	0	0	-6.38893	32.3112
1	-4.35145	GO:0010721	M1	1	0	GO Biological Processes	19	negative regulation of cell development	19_GO:0032502 developmental process	-4.35145	20.2317	8.58157	30211	181	33	4	12.1212	5.68144	2932|5728|7124|7157	GSK3B|PTEN|TNF|TP53	-2.73996	0	31	0	0	-6.38893	32.3112
1	-4.08334	GO:1901987	M1	1	0	GO Biological Processes	19	regulation of cell cycle phase transition	19_GO:0050789 regulation of biological process	-4.08334	11.0299	6.80347	30211	415	33	5	15.1515	6.24156	301|1956|5728|5925|7157	ANXA1|EGFR|PTEN|RB1|TP53	-2.5146	0	31	0	0	-6.38893	32.3112
1	-4.03053	GO:0045930	M1	1	0	GO Biological Processes	19	negative regulation of mitotic cell cycle	19_GO:0048519 negative regulation of biological process	-4.03053	16.7212	7.72132	30211	219	33	4	12.1212	5.68144	5728|5925|7124|7157	PTEN|RB1|TNF|TP53	-2.47458	0	31	0	0	-6.38893	32.3112
1	-3.95731	GO:2000106	M1	1	0	GO Biological Processes	19	regulation of leukocyte apoptotic process	19_GO:0050789 regulation of biological process	-3.95731	32.3112	9.5593	30211	85	33	3	9.09091	5.00438	301|5728|7157	ANXA1|PTEN|TP53	-2.4149	0	31	0	0	-6.38893	32.3112
1	-3.94221	GO:2000134	M1	1	0	GO Biological Processes	19	negative regulation of G1/S transition of mitotic cell cycle	19_GO:0048519 negative regulation of biological process	-3.94221	31.9355	9.50014	30211	86	33	3	9.09091	5.00438	5728|5925|7157	PTEN|RB1|TP53	-2.40372	0	31	0	0	-6.38893	32.3112
1	-3.7872	GO:1902807	M1	1	0	GO Biological Processes	19	negative regulation of cell cycle G1/S phase transition	19_GO:0048519 negative regulation of biological process	-3.7872	28.314	8.90991	30211	97	33	3	9.09091	5.00438	5728|5925|7157	PTEN|RB1|TP53	-2.26961	0	31	0	0	-6.38893	32.3112
1	-3.7378	GO:0007264	M1	1	0	GO Biological Processes	19	small GTPase mediated signal transduction	19_GO:0023052 signaling	-3.7378	14.0304	6.99145	30211	261	33	4	12.1212	5.68144	3162|3725|5925|7157	HMOX1|JUN|RB1|TP53	-2.23302	0	31	0	0	-6.38893	32.3112
1	-3.3315	GO:0001655	M1	1	0	GO Biological Processes	19	urogenital system development	19_GO:0032502 developmental process	-3.3315	10.9639	6.05509	30211	334	33	4	12.1212	5.68144	301|4609|5728|7042	ANXA1|MYC|PTEN|TGFB2	-1.87526	0	31	0	0	-6.38893	32.3112
1	-3.31882	GO:0050768	M1	1	0	GO Biological Processes	19	negative regulation of neurogenesis	19_GO:0032502 developmental process	-3.31882	19.6175	7.30129	30211	140	33	3	9.09091	5.00438	5728|7124|7157	PTEN|TNF|TP53	-1.86818	0	31	0	0	-6.38893	32.3112
1	-3.27439	GO:0051961	M1	1	0	GO Biological Processes	19	negative regulation of nervous system development	19_GO:0032502 developmental process	-3.27439	18.9411	7.16113	30211	145	33	3	9.09091	5.00438	5728|7124|7157	PTEN|TNF|TP53	-1.83241	0	31	0	0	-6.38893	32.3112
1	-3.16929	GO:0048589	M1	1	0	GO Biological Processes	19	developmental growth	19_GO:0040007 growth	-3.16929	9.92395	5.70353	30211	369	33	4	12.1212	5.68144	301|5728|7042|7157	ANXA1|PTEN|TGFB2|TP53	-1.73657	0	31	0	0	-6.38893	32.3112
1	-3.16053	GO:0040007	M1	1	0	GO Biological Processes	19	growth	19_GO:0040007 growth	-3.16053	9.87046	5.68487	30211	371	33	4	12.1212	5.68144	301|5728|7042|7157	ANXA1|PTEN|TGFB2|TP53	-1.72857	0	31	0	0	-6.38893	32.3112
1	-3.07387	GO:1901991	M1	1	0	GO Biological Processes	19	negative regulation of mitotic cell cycle phase transition	19_GO:0048519 negative regulation of biological process	-3.07387	16.1556	6.55282	30211	170	33	3	9.09091	5.00438	5728|5925|7157	PTEN|RB1|TP53	-1.65319	0	31	0	0	-6.38893	32.3112
1	-2.9478	GO:0007265	M1	1	0	GO Biological Processes	19	Ras protein signal transduction	19_GO:0023052 signaling	-2.9478	14.6088	6.18955	30211	188	33	3	9.09091	5.00438	3725|5925|7157	JUN|RB1|TP53	-1.54387	0	31	0	0	-6.38893	32.3112
1	-2.69734	GO:1901988	M1	1	0	GO Biological Processes	19	negative regulation of cell cycle phase transition	19_GO:0048519 negative regulation of biological process	-2.69734	11.9411	5.50794	30211	230	33	3	9.09091	5.00438	5728|5925|7157	PTEN|RB1|TP53	-1.31022	0	31	0	0	-6.38893	32.3112
1	-2.46046	GO:0010948	M1	1	0	GO Biological Processes	19	negative regulation of cell cycle process	19_GO:0048519 negative regulation of biological process	-2.46046	9.84392	4.90757	30211	279	33	3	9.09091	5.00438	5728|5925|7157	PTEN|RB1|TP53	-1.09545	0	31	0	0	-6.38893	32.3112
1	-2.35233	GO:0007162	M1	1	0	GO Biological Processes	19	negative regulation of cell adhesion	19_GO:0022610 biological adhesion	-2.35233	9.00477	4.64629	30211	305	33	3	9.09091	5.00438	301|5728|7040	ANXA1|PTEN|TGFB1	-0.991865	0	31	0	0	-6.38893	32.3112
1	-2.3172	GO:0071103	M1	1	0	GO Biological Processes	19	DNA conformation change	19_GO:0009987 cellular process	-2.3172	8.74667	4.56303	30211	314	33	3	9.09091	5.00438	301|5925|7157	ANXA1|RB1|TP53	-0.95932	0	31	0	0	-6.38893	32.3112
1	-6.25902	GO:0046824	M1	1	0	GO Biological Processes	19	positive regulation of nucleocytoplasmic transport	19_GO:0051179 localization	-6.25902	61.0323	15.3921	30211	60	33	4	12.1212	5.68144	2932|4734|5743|7040	GSK3B|NEDD4|PTGS2|TGFB1	-4.34994	0	32	1	1	-6.25902	61.0323
1	-5.29921	GO:0046822	M1	1	0	GO Biological Processes	19	regulation of nucleocytoplasmic transport	19_GO:0051179 localization	-5.29921	35.211	11.5567	30211	104	33	4	12.1212	5.68144	2932|4734|5743|7040	GSK3B|NEDD4|PTGS2|TGFB1	-3.53626	0	32	0	0	-6.25902	61.0323
1	-4.62237	GO:0045912	M1	1	0	GO Biological Processes	19	negative regulation of carbohydrate metabolic process	19_GO:0048519 negative regulation of biological process	-4.62237	53.852	12.4916	30211	51	33	3	9.09091	5.00438	2932|7040|7157	GSK3B|TGFB1|TP53	-2.96087	0	32	0	0	-6.25902	61.0323
1	-4.53017	GO:0032386	M1	1	0	GO Biological Processes	19	regulation of intracellular transport	19_GO:0051179 localization	-4.53017	13.7049	7.72079	30211	334	33	5	15.1515	6.24156	2932|4734|5594|5743|7040	GSK3B|NEDD4|MAPK1|PTGS2|TGFB1	-2.88516	0	32	0	0	-6.25902	61.0323
1	-4.47662	GO:0038127	M1	1	0	GO Biological Processes	19	ERBB signaling pathway	19_GO:0023052 signaling	-4.47662	48.1834	11.7907	30211	57	33	3	9.09091	5.00438	1956|5594|7040	EGFR|MAPK1|TGFB1	-2.84749	0	32	0	0	-6.25902	61.0323
1	-4.19992	GO:0032388	M1	1	0	GO Biological Processes	19	positive regulation of intracellular transport	19_GO:0051179 localization	-4.19992	18.4946	8.16714	30211	198	33	4	12.1212	5.68144	2932|4734|5743|7040	GSK3B|NEDD4|PTGS2|TGFB1	-2.61088	0	32	0	0	-6.25902	61.0323
1	-4.14333	GO:0007169	M1	1	0	GO Biological Processes	19	transmembrane receptor protein tyrosine kinase signaling pathway	19_GO:0023052 signaling	-4.14333	11.3584	6.92253	30211	403	33	5	15.1515	6.24156	1956|2932|3315|5594|7040	EGFR|GSK3B|HSPB1|MAPK1|TGFB1	-2.56403	0	32	0	0	-6.25902	61.0323
1	-3.94221	GO:0034103	M1	1	0	GO Biological Processes	19	regulation of tissue remodeling	19_GO:0032501 multicellular organismal process	-3.94221	31.9355	9.50014	30211	86	33	3	9.09091	5.00438	7040|7128|7157	TGFB1|TNFAIP3|TP53	-2.40372	0	32	0	0	-6.25902	61.0323
1	-3.39347	GO:1900180	M1	1	0	GO Biological Processes	19	regulation of protein localization to nucleus	19_GO:0051179 localization	-3.39347	20.8065	7.54136	30211	132	33	3	9.09091	5.00438	2932|5743|7040	GSK3B|PTGS2|TGFB1	-1.93318	0	32	0	0	-6.25902	61.0323
1	-3.32175	GO:0030111	M1	1	0	GO Biological Processes	19	regulation of Wnt signaling pathway	19_GO:0023052 signaling	-3.32175	10.8986	6.03362	30211	336	33	4	12.1212	5.68144	1956|2932|7040|7128	EGFR|GSK3B|TGFB1|TNFAIP3	-1.86818	0	32	0	0	-6.25902	61.0323
1	-3.31882	GO:0050921	M1	1	0	GO Biological Processes	19	positive regulation of chemotaxis	19_GO:0040011 locomotion	-3.31882	19.6175	7.30129	30211	140	33	3	9.09091	5.00438	3315|5594|7040	HSPB1|MAPK1|TGFB1	-1.86818	0	32	0	0	-6.25902	61.0323
1	-3.28314	GO:0030177	M1	1	0	GO Biological Processes	19	positive regulation of Wnt signaling pathway	19_GO:0023052 signaling	-3.28314	19.0726	7.18859	30211	144	33	3	9.09091	5.00438	1956|7040|7128	EGFR|TGFB1|TNFAIP3	-1.83882	0	32	0	0	-6.25902	61.0323
1	-3.18202	GO:0090316	M1	1	0	GO Biological Processes	19	positive regulation of intracellular protein transport	19_GO:0051179 localization	-3.18202	17.6055	6.8761	30211	156	33	3	9.09091	5.00438	2932|5743|7040	GSK3B|PTGS2|TGFB1	-1.74777	0	32	0	0	-6.25902	61.0323
1	-2.73	GO:0033157	M1	1	0	GO Biological Processes	19	regulation of intracellular protein transport	19_GO:0051179 localization	-2.73	12.261	5.59397	30211	224	33	3	9.09091	5.00438	2932|5743|7040	GSK3B|PTGS2|TGFB1	-1.34013	0	32	0	0	-6.25902	61.0323
1	-2.72449	GO:0050920	M1	1	0	GO Biological Processes	19	regulation of chemotaxis	19_GO:0040011 locomotion	-2.72449	12.2065	5.5794	30211	225	33	3	9.09091	5.00438	3315|5594|7040	HSPB1|MAPK1|TGFB1	-1.33531	0	32	0	0	-6.25902	61.0323
1	-2.54189	GO:0060828	M1	1	0	GO Biological Processes	19	regulation of canonical Wnt signaling pathway	19_GO:0023052 signaling	-2.54189	10.5228	5.10945	30211	261	33	3	9.09091	5.00438	1956|2932|7040	EGFR|GSK3B|TGFB1	-1.16564	0	32	0	0	-6.25902	61.0323
1	-5.9417	GO:2001242	M1	1	0	GO Biological Processes	19	regulation of intrinsic apoptotic signaling pathway	19_GO:0023052 signaling	-5.9417	26.7686	11.1744	30211	171	33	5	15.1515	6.24156	3315|4609|4780|5743|7157	HSPB1|MYC|NFE2L2|PTGS2|TP53	-4.06984	0	33	1	1	-5.9417	26.926
1	-3.72266	GO:2001243	M1	1	0	GO Biological Processes	19	negative regulation of intrinsic apoptotic signaling pathway	19_GO:0023052 signaling	-3.72266	26.926	8.67311	30211	102	33	3	9.09091	5.00438	3315|4780|5743	HSPB1|NFE2L2|PTGS2	-2.22502	0	33	0	0	-5.9417	26.926
1	-3.70009	GO:0007568	M1	1	0	GO Biological Processes	19	aging	19_GO:0032502 developmental process	-3.70009	13.7151	6.90095	30211	267	33	4	12.1212	5.68144	1728|4780|5743|7157	NQO1|NFE2L2|PTGS2|TP53	-2.20687	0	33	0	0	-5.9417	26.926
1	-2.67606	GO:0001894	M1	1	0	GO Biological Processes	19	tissue homeostasis	19_GO:0032501 multicellular organismal process	-2.67606	11.737	5.45234	30211	234	33	3	9.09091	5.00438	3315|5743|5925	HSPB1|PTGS2|RB1	-1.29237	0	33	0	0	-5.9417	26.926
1	-2.45176	GO:0060249	M1	1	0	GO Biological Processes	19	anatomical structure homeostasis	19_GO:0065007 biological regulation	-2.45176	9.77386	4.88627	30211	281	33	3	9.09091	5.00438	3315|5743|5925	HSPB1|PTGS2|RB1	-1.08741	0	33	0	0	-5.9417	26.926
1	-2.15663	GO:0048871	M1	1	0	GO Biological Processes	19	multicellular organismal homeostasis	19_GO:0032501 multicellular organismal process	-2.15663	7.65029	4.19168	30211	359	33	3	9.09091	5.00438	3315|5743|5925	HSPB1|PTGS2|RB1	-0.805751	0	33	0	0	-5.9417	26.926
1	-5.79709	GO:0060322	M1	1	0	GO Biological Processes	19	head development	19_GO:0032502 developmental process	-5.79709	9.30607	7.80763	30211	787	33	8	24.2424	7.46009	1152|1956|2932|3309|4609|5594|5728|7157	CKB|EGFR|GSK3B|HSPA5|MYC|MAPK1|PTEN|TP53	-3.94539	0	34	1	1	-5.79709	28.025
1	-4.89174	GO:0007420	M1	1	0	GO Biological Processes	19	brain development	19_GO:0032502 developmental process	-4.89174	8.63665	6.96481	30211	742	33	7	21.2121	7.11647	1152|1956|2932|3309|4609|5728|7157	CKB|EGFR|GSK3B|HSPA5|MYC|PTEN|TP53	-3.18963	0	34	0	0	-5.79709	28.025
1	-3.83624	GO:1903320	M1	1	0	GO Biological Processes	19	regulation of protein modification by small protein conjugation or removal	19_GO:0008152 metabolic process	-3.83624	14.8859	7.2314	30211	246	33	4	12.1212	5.68144	3309|5728|5970|7128	HSPA5|PTEN|RELA|TNFAIP3	-2.30738	0	34	0	0	-5.79709	28.025
1	-3.77402	GO:0000079	M1	1	0	GO Biological Processes	19	regulation of cyclin-dependent protein serine/threonine kinase activity	19_GO:0008152 metabolic process	-3.77402	28.025	8.86114	30211	98	33	3	9.09091	5.00438	1956|5728|7128	EGFR|PTEN|TNFAIP3	-2.25921	0	34	0	0	-5.79709	28.025
1	-3.7353	GO:1904029	M1	1	0	GO Biological Processes	19	regulation of cyclin-dependent protein kinase activity	19_GO:0008152 metabolic process	-3.7353	27.1926	8.71909	30211	101	33	3	9.09091	5.00438	1956|5728|7128	EGFR|PTEN|TNFAIP3	-2.23231	0	34	0	0	-5.79709	28.025
1	-3.6494	GO:0021761	M1	1	0	GO Biological Processes	19	limbic system development	19_GO:0032502 developmental process	-3.6494	25.4301	8.41046	30211	108	33	3	9.09091	5.00438	2932|4609|5728	GSK3B|MYC|PTEN	-2.16054	0	34	0	0	-5.79709	28.025
1	-3.14315	GO:0030900	M1	1	0	GO Biological Processes	19	forebrain development	19_GO:0032502 developmental process	-3.14315	9.76517	5.64798	30211	375	33	4	12.1212	5.68144	1956|2932|4609|5728	EGFR|GSK3B|MYC|PTEN	-1.71348	0	34	0	0	-5.79709	28.025
1	-3.08128	GO:0021543	M1	1	0	GO Biological Processes	19	pallium development	19_GO:0032502 developmental process	-3.08128	16.2512	6.57462	30211	169	33	3	9.09091	5.00438	1956|2932|5728	EGFR|GSK3B|PTEN	-1.65911	0	34	0	0	-5.79709	28.025
1	-2.79236	GO:0031396	M1	1	0	GO Biological Processes	19	regulation of protein ubiquitination	19_GO:0008152 metabolic process	-2.79236	12.8942	5.76055	30211	213	33	3	9.09091	5.00438	3309|5728|7128	HSPA5|PTEN|TNFAIP3	-1.39692	0	34	0	0	-5.79709	28.025
1	-2.6095	GO:0021537	M1	1	0	GO Biological Processes	19	telencephalon development	19_GO:0032502 developmental process	-2.6095	11.1192	5.28061	30211	247	33	3	9.09091	5.00438	1956|2932|5728	EGFR|GSK3B|PTEN	-1.22988	0	34	0	0	-5.79709	28.025
1	-5.74156	GO:0045765	M1	1	0	GO Biological Processes	19	regulation of angiogenesis	19_GO:0032502 developmental process	-5.74156	15.9215	9.21764	30211	345	33	6	18.1818	6.71408	3162|3315|4780|7042|7124|7128	HMOX1|HSPB1|NFE2L2|TGFB2|TNF|TNFAIP3	-3.89583	0	35	1	1	-5.74156	44.2977
1	-5.69831	GO:1901342	M1	1	0	GO Biological Processes	19	regulation of vasculature development	19_GO:0032502 developmental process	-5.69831	15.6493	9.12879	30211	351	33	6	18.1818	6.71408	3162|3315|4780|7042|7124|7128	HMOX1|HSPB1|NFE2L2|TGFB2|TNF|TNFAIP3	-3.85879	0	35	0	0	-5.74156	44.2977
1	-4.36678	GO:0032731	M1	1	0	GO Biological Processes	19	positive regulation of interleukin-1 beta production	19_GO:0048518 positive regulation of biological process	-4.36678	44.2977	11.2852	30211	62	33	3	9.09091	5.00438	841|3315|7124	CASP8|HSPB1|TNF	-2.75414	0	35	0	0	-5.74156	44.2977
1	-4.1543	GO:0032732	M1	1	0	GO Biological Processes	19	positive regulation of interleukin-1 production	19_GO:0048518 positive regulation of biological process	-4.1543	37.6227	10.3596	30211	73	33	3	9.09091	5.00438	841|3315|7124	CASP8|HSPB1|TNF	-2.57285	0	35	0	0	-5.74156	44.2977
1	-4.08514	GO:1903201	M1	1	0	GO Biological Processes	19	regulation of oxidative stress-induced cell death	19_GO:0050896 response to stimulus	-4.08514	35.6682	10.0725	30211	77	33	3	9.09091	5.00438	3315|4780|7124	HSPB1|NFE2L2|TNF	-2.51536	0	35	0	0	-5.74156	44.2977
1	-3.85528	GO:1900407	M1	1	0	GO Biological Processes	19	regulation of cellular response to oxidative stress	19_GO:0050896 response to stimulus	-3.85528	29.8528	9.16533	30211	92	33	3	9.09091	5.00438	3315|4780|7124	HSPB1|NFE2L2|TNF	-2.32546	0	35	0	0	-5.74156	44.2977
1	-3.7353	GO:1902882	M1	1	0	GO Biological Processes	19	regulation of response to oxidative stress	19_GO:0050896 response to stimulus	-3.7353	27.1926	8.71909	30211	101	33	3	9.09091	5.00438	3315|4780|7124	HSPB1|NFE2L2|TNF	-2.23231	0	35	0	0	-5.74156	44.2977
1	-3.5042	GO:0006986	M1	1	0	GO Biological Processes	19	response to unfolded protein	19_GO:0050896 response to stimulus	-3.5042	22.698	7.90839	30211	121	33	3	9.09091	5.00438	3309|3315|4780	HSPA5|HSPB1|NFE2L2	-2.03153	0	35	0	0	-5.74156	44.2977
1	-3.30085	GO:0035966	M1	1	0	GO Biological Processes	19	response to topologically incorrect protein	19_GO:0050896 response to stimulus	-3.30085	19.3412	7.24436	30211	142	33	3	9.09091	5.00438	3309|3315|4780	HSPA5|HSPB1|NFE2L2	-1.85259	0	35	0	0	-5.74156	44.2977
1	-2.9815	GO:0045766	M1	1	0	GO Biological Processes	19	positive regulation of angiogenesis	19_GO:0032502 developmental process	-2.9815	15.0079	6.28527	30211	183	33	3	9.09091	5.00438	3162|3315|4780	HMOX1|HSPB1|NFE2L2	-1.57326	0	35	0	0	-5.74156	44.2977
1	-2.9815	GO:1904018	M1	1	0	GO Biological Processes	19	positive regulation of vasculature development	19_GO:0032502 developmental process	-2.9815	15.0079	6.28527	30211	183	33	3	9.09091	5.00438	3162|3315|4780	HMOX1|HSPB1|NFE2L2	-1.57326	0	35	0	0	-5.74156	44.2977
1	-2.21456	GO:0009615	M1	1	0	GO Biological Processes	19	response to virus	19_GO:0044419 biological process involved in interspecies interaction between organisms	-2.21456	8.03057	4.32395	30211	342	33	3	9.09091	5.00438	3315|5970|7124	HSPB1|RELA|TNF	-0.859238	0	35	0	0	-5.74156	44.2977
1	-5.59693	GO:0009612	M1	1	0	GO Biological Processes	19	response to mechanical stimulus	19_GO:0050896 response to stimulus	-5.59693	22.7733	10.2418	30211	201	33	5	15.1515	6.24156	841|3725|5743|5970|7124	CASP8|JUN|PTGS2|RELA|TNF	-3.78016	0	36	1	1	-5.59693	31.5684
1	-5.30208	GO:0030099	M1	1	0	GO Biological Processes	19	myeloid cell differentiation	19_GO:0002376 immune system process	-5.30208	19.8157	9.49287	30211	231	33	5	15.1515	6.24156	841|2194|3725|5925|7124	CASP8|FASN|JUN|RB1|TNF	-3.5375	0	36	0	0	-5.59693	31.5684
1	-5.11086	GO:0002573	M1	1	0	GO Biological Processes	19	myeloid leukocyte differentiation	19_GO:0002376 immune system process	-5.11086	31.5684	10.9079	30211	116	33	4	12.1212	5.68144	841|2194|3725|7124	CASP8|FASN|JUN|TNF	-3.38393	0	36	0	0	-5.59693	31.5684
1	-4.28732	GO:0043123	M1	1	0	GO Biological Processes	19	positive regulation of I-kappaB kinase/NF-kappaB signaling	19_GO:0023052 signaling	-4.28732	19.4784	8.40434	30211	188	33	4	12.1212	5.68144	841|3162|5970|7124	CASP8|HMOX1|RELA|TNF	-2.68495	0	36	0	0	-5.59693	31.5684
1	-5.1608	GO:0016032	M1	1	0	GO Biological Processes	19	viral process	19_GO:0016032 viral process	-5.1608	18.5321	9.14891	30211	247	33	5	15.1515	6.24156	1956|2932|4734|6520|7157	EGFR|GSK3B|NEDD4|SLC3A2|TP53	-3.41701	0	37	1	1	-5.1608	18.5321
1	-3.00917	GO:0019058	M1	1	0	GO Biological Processes	19	viral life cycle	19_GO:0016032 viral process	-3.00917	15.3433	6.3646	30211	179	33	3	9.09091	5.00438	1956|4734|6520	EGFR|NEDD4|SLC3A2	-1.59585	0	37	0	0	-5.1608	18.5321
1	-5.11987	GO:0045920	M1	1	0	GO Biological Processes	19	negative regulation of exocytosis	19_GO:0051179 localization	-5.11987	78.4701	15.1644	30211	35	33	3	9.09091	5.00438	301|3162|6622	ANXA1|HMOX1|SNCA	-3.39143	0	38	1	1	-5.11987	78.4701
1	-5.11987	GO:0090050	M1	1	0	GO Biological Processes	19	positive regulation of cell migration involved in sprouting angiogenesis	19_GO:0040011 locomotion	-5.11987	78.4701	15.1644	30211	35	33	3	9.09091	5.00438	301|3162|5743	ANXA1|HMOX1|PTGS2	-3.39143	0	38	0	0	-5.11987	78.4701
1	-4.48785	GO:0051048	M1	1	0	GO Biological Processes	19	negative regulation of secretion	19_GO:0051179 localization	-4.48785	21.9278	8.96788	30211	167	33	4	12.1212	5.68144	301|3162|6622|7124	ANXA1|HMOX1|SNCA|TNF	-2.85269	0	38	0	0	-5.11987	78.4701
1	-4.26574	GO:0010517	M1	1	0	GO Biological Processes	19	regulation of phospholipase activity	19_GO:0065007 biological regulation	-4.26574	40.9919	10.8367	30211	67	33	3	9.09091	5.00438	301|1956|6622	ANXA1|EGFR|SNCA	-2.66897	0	38	0	0	-5.11987	78.4701
1	-4.14967	GO:0017157	M1	1	0	GO Biological Processes	19	regulation of exocytosis	19_GO:0051179 localization	-4.14967	17.9507	8.03301	30211	204	33	4	12.1212	5.68144	301|2932|3162|6622	ANXA1|GSK3B|HMOX1|SNCA	-2.56929	0	38	0	0	-5.11987	78.4701
1	-4.06843	GO:0090049	M1	1	0	GO Biological Processes	19	regulation of cell migration involved in sprouting angiogenesis	19_GO:0040011 locomotion	-4.06843	35.211	10.0041	30211	78	33	3	9.09091	5.00438	301|3162|5743	ANXA1|HMOX1|PTGS2	-2.50385	0	38	0	0	-5.11987	78.4701
1	-3.86935	GO:0060191	M1	1	0	GO Biological Processes	19	regulation of lipase activity	19_GO:0065007 biological regulation	-3.86935	30.1808	9.21887	30211	91	33	3	9.09091	5.00438	301|1956|6622	ANXA1|EGFR|SNCA	-2.33666	0	38	0	0	-5.11987	78.4701
1	-3.85528	GO:0019217	M1	1	0	GO Biological Processes	19	regulation of fatty acid metabolic process	19_GO:0008152 metabolic process	-3.85528	29.8528	9.16533	30211	92	33	3	9.09091	5.00438	301|5743|6622	ANXA1|PTGS2|SNCA	-2.32546	0	38	0	0	-5.11987	78.4701
1	-3.47299	GO:0042177	M1	1	0	GO Biological Processes	19	negative regulation of protein catabolic process	19_GO:0048519 negative regulation of biological process	-3.47299	22.1488	7.8036	30211	124	33	3	9.09091	5.00438	1956|5970|6622	EGFR|RELA|SNCA	-2.00449	0	38	0	0	-5.11987	78.4701
1	-3.39347	GO:0010565	M1	1	0	GO Biological Processes	19	regulation of cellular ketone metabolic process	19_GO:0008152 metabolic process	-3.39347	20.8065	7.54136	30211	132	33	3	9.09091	5.00438	301|5743|6622	ANXA1|PTGS2|SNCA	-1.93318	0	38	0	0	-5.11987	78.4701
1	-3.29196	GO:1903531	M1	1	0	GO Biological Processes	19	negative regulation of secretion by cell	19_GO:0051179 localization	-3.29196	19.206	7.21634	30211	143	33	3	9.09091	5.00438	301|3162|6622	ANXA1|HMOX1|SNCA	-1.84528	0	38	0	0	-5.11987	78.4701
1	-4.37025	GO:0043409	M1	1	0	GO Biological Processes	19	negative regulation of MAPK cascade	19_GO:0023052 signaling	-4.37025	20.4578	8.63405	30211	179	33	4	12.1212	5.68144	2950|4609|5728|7345	GSTP1|MYC|PTEN|UCHL1	-2.7545	0	39	1	1	-4.37025	37.1143
1	-4.22516	GO:0031175	M1	1	0	GO Biological Processes	19	neuron projection development	19_GO:0032502 developmental process	-4.22516	8.5961	6.41783	30211	639	33	6	18.1818	6.71408	2932|3725|4734|5728|5925|7345	GSK3B|JUN|NEDD4|PTEN|RB1|UCHL1	-2.63392	0	39	0	0	-4.37025	37.1143
1	-4.13665	GO:0019233	M1	1	0	GO Biological Processes	19	sensory perception of pain	19_GO:0032501 multicellular organismal process	-4.13665	37.1143	10.2856	30211	74	33	3	9.09091	5.00438	5743|7124|7345	PTGS2|TNF|UCHL1	-2.55841	0	39	0	0	-4.37025	37.1143
1	-3.35557	GO:0030534	M1	1	0	GO Biological Processes	19	adult behavior	19_GO:0007610 behavior	-3.35557	20.1945	7.41875	30211	136	33	3	9.09091	5.00438	5728|6622|7345	PTEN|SNCA|UCHL1	-1.89771	0	39	0	0	-4.37025	37.1143
1	-3.33706	GO:0050905	M1	1	0	GO Biological Processes	19	neuromuscular process	19_GO:0032501 multicellular organismal process	-3.33706	19.9018	7.3594	30211	138	33	3	9.09091	5.00438	5728|7124|7345	PTEN|TNF|UCHL1	-1.88001	0	39	0	0	-4.37025	37.1143
1	-2.96116	GO:0007626	M1	1	0	GO Biological Processes	19	locomotory behavior	19_GO:0007610 behavior	-2.96116	14.7659	6.22739	30211	186	33	3	9.09091	5.00438	5728|6622|7345	PTEN|SNCA|UCHL1	-1.55509	0	39	0	0	-4.37025	37.1143
1	-2.08909	GO:0061564	M1	1	0	GO Biological Processes	19	axon development	19_GO:0032502 developmental process	-2.08909	7.22751	4.0398	30211	380	33	3	9.09091	5.00438	3725|5728|7345	JUN|PTEN|UCHL1	-0.741991	0	39	0	0	-4.37025	37.1143
1	-4.34487	GO:0051603	M1	1	0	GO Biological Processes	19	proteolysis involved in cellular protein catabolic process	19_GO:0008152 metabolic process	-4.34487	9.03439	6.61796	30211	608	33	6	18.1818	6.71408	841|3309|4734|4780|7128|7345	CASP8|HSPA5|NEDD4|NFE2L2|TNFAIP3|UCHL1	-2.73453	0	40	1	1	-4.34487	12.1256
1	-4.22892	GO:0044257	M1	1	0	GO Biological Processes	19	cellular protein catabolic process	19_GO:0008152 metabolic process	-4.22892	8.60958	6.42407	30211	638	33	6	18.1818	6.71408	841|3309|4734|4780|7128|7345	CASP8|HSPA5|NEDD4|NFE2L2|TNFAIP3|UCHL1	-2.63658	0	40	0	0	-4.34487	12.1256
1	-4.03108	GO:0030163	M1	1	0	GO Biological Processes	19	protein catabolic process	19_GO:0008152 metabolic process	-4.03108	7.92628	6.09972	30211	693	33	6	18.1818	6.71408	841|3309|4734|4780|7128|7345	CASP8|HSPA5|NEDD4|NFE2L2|TNFAIP3|UCHL1	-2.47458	0	40	0	0	-4.34487	12.1256
1	-3.60377	GO:0006511	M1	1	0	GO Biological Processes	19	ubiquitin-dependent protein catabolic process	19_GO:0008152 metabolic process	-3.60377	8.70233	5.89296	30211	526	33	5	15.1515	6.24156	3309|4734|4780|7128|7345	HSPA5|NEDD4|NFE2L2|TNFAIP3|UCHL1	-2.11923	0	40	0	0	-4.34487	12.1256
1	-3.56608	GO:0019941	M1	1	0	GO Biological Processes	19	modification-dependent protein catabolic process	19_GO:0008152 metabolic process	-3.56608	8.53997	5.8243	30211	536	33	5	15.1515	6.24156	3309|4734|4780|7128|7345	HSPA5|NEDD4|NFE2L2|TNFAIP3|UCHL1	-2.08582	0	40	0	0	-4.34487	12.1256
1	-3.52551	GO:0043632	M1	1	0	GO Biological Processes	19	modification-dependent macromolecule catabolic process	19_GO:0008152 metabolic process	-3.52551	8.36823	5.75081	30211	547	33	5	15.1515	6.24156	3309|4734|4780|7128|7345	HSPA5|NEDD4|NFE2L2|TNFAIP3|UCHL1	-2.04943	0	40	0	0	-4.34487	12.1256
1	-3.49663	GO:0043161	M1	1	0	GO Biological Processes	19	proteasome-mediated ubiquitin-dependent protein catabolic process	19_GO:0008152 metabolic process	-3.49663	12.1256	6.42561	30211	302	33	4	12.1212	5.68144	3309|4734|4780|7345	HSPA5|NEDD4|NFE2L2|UCHL1	-2.0248	0	40	0	0	-4.34487	12.1256
1	-3.28335	GO:0010498	M1	1	0	GO Biological Processes	19	proteasomal protein catabolic process	19_GO:0008152 metabolic process	-3.28335	10.6452	5.9495	30211	344	33	4	12.1212	5.68144	3309|4734|4780|7345	HSPA5|NEDD4|NFE2L2|UCHL1	-1.83882	0	40	0	0	-4.34487	12.1256
1	-2.69198	GO:0045088	M1	1	0	GO Biological Processes	19	regulation of innate immune response	19_GO:0044419 biological process involved in interspecies interaction between organisms	-2.69198	11.8894	5.49391	30211	231	33	3	9.09091	5.00438	841|4780|7128	CASP8|NFE2L2|TNFAIP3	-1.30692	0	40	0	0	-4.34487	12.1256
1	-2.18351	GO:0002831	M1	1	0	GO Biological Processes	19	regulation of response to biotic stimulus	19_GO:0050896 response to stimulus	-2.18351	7.82466	4.25282	30211	351	33	3	9.09091	5.00438	841|4780|7128	CASP8|NFE2L2|TNFAIP3	-0.83073	0	40	0	0	-4.34487	12.1256
1	-4.10896	GO:1901215	M1	1	0	GO Biological Processes	19	negative regulation of neuron death	19_GO:0048519 negative regulation of biological process	-4.10896	17.5212	7.92552	30211	209	33	4	12.1212	5.68144	2932|3162|3725|6622	GSK3B|HMOX1|JUN|SNCA	-2.53497	0	41	1	1	-4.10896	18.9411
1	-3.27439	GO:0043524	M1	1	0	GO Biological Processes	19	negative regulation of neuron apoptotic process	19_GO:0048519 negative regulation of biological process	-3.27439	18.9411	7.16113	30211	145	33	3	9.09091	5.00438	3162|3725|6622	HMOX1|JUN|SNCA	-1.83241	0	41	0	0	-4.10896	18.9411
1	-3.23008	GO:0006873	M1	1	0	GO Biological Processes	19	cellular ion homeostasis	19_GO:0065007 biological regulation	-3.23008	7.20854	5.2287	30211	635	33	5	15.1515	6.24156	1152|3162|4609|5594|6622	CKB|HMOX1|MYC|MAPK1|SNCA	-1.7943	0	41	0	0	-4.10896	18.9411
1	-3.11138	GO:0051100	M1	1	0	GO Biological Processes	19	negative regulation of binding	19_GO:0065007 biological regulation	-3.11138	16.6452	6.66371	30211	165	33	3	9.09091	5.00438	2932|3162|3725	GSK3B|HMOX1|JUN	-1.68473	0	41	0	0	-4.10896	18.9411
1	-3.03416	GO:0098771	M1	1	0	GO Biological Processes	19	inorganic ion homeostasis	19_GO:0065007 biological regulation	-3.03416	6.52055	4.89396	30211	702	33	5	15.1515	6.24156	1152|3162|4609|5594|6622	CKB|HMOX1|MYC|MAPK1|SNCA	-1.61792	0	41	0	0	-4.10896	18.9411
1	-2.9166	GO:0055082	M1	1	0	GO Biological Processes	19	cellular chemical homeostasis	19_GO:0065007 biological regulation	-2.9166	6.13596	4.69704	30211	746	33	5	15.1515	6.24156	1152|3162|4609|5594|6622	CKB|HMOX1|MYC|MAPK1|SNCA	-1.51481	0	41	0	0	-4.10896	18.9411
1	-2.89607	GO:0050801	M1	1	0	GO Biological Processes	19	ion homeostasis	19_GO:0065007 biological regulation	-2.89607	6.07085	4.66294	30211	754	33	5	15.1515	6.24156	1152|3162|4609|5594|6622	CKB|HMOX1|MYC|MAPK1|SNCA	-1.4957	0	41	0	0	-4.10896	18.9411
1	-2.34844	GO:0030003	M1	1	0	GO Biological Processes	19	cellular cation homeostasis	19_GO:0065007 biological regulation	-2.34844	5.90635	4.0819	30211	620	33	4	12.1212	5.68144	3162|4609|5594|6622	HMOX1|MYC|MAPK1|SNCA	-0.988622	0	41	0	0	-4.10896	18.9411
1	-2.18105	GO:0055080	M1	1	0	GO Biological Processes	19	cation homeostasis	19_GO:0065007 biological regulation	-2.18105	5.29182	3.77686	30211	692	33	4	12.1212	5.68144	3162|4609|5594|6622	HMOX1|MYC|MAPK1|SNCA	-0.828912	0	41	0	0	-4.10896	18.9411
1	-3.75859	GO:0090066	M1	1	0	GO Biological Processes	19	regulation of anatomical structure size	19_GO:0065007 biological regulation	-3.75859	9.39923	6.17927	30211	487	33	5	15.1515	6.24156	246|2932|5728|5743|7124	ALOX15|GSK3B|PTEN|PTGS2|TNF	-2.24563	0	42	1	1	-3.75859	16.1556
1	-3.75446	GO:0090407	M1	1	0	GO Biological Processes	19	organophosphate biosynthetic process	19_GO:0008152 metabolic process	-3.75446	9.37997	6.17153	30211	488	33	5	15.1515	6.24156	246|1152|2182|5728|7040	ALOX15|CKB|ACSL4|PTEN|TGFB1	-2.24332	0	42	0	0	-3.75859	16.1556
1	-3.07387	GO:1901617	M1	1	0	GO Biological Processes	19	organic hydroxy compound biosynthetic process	19_GO:0008152 metabolic process	-3.07387	16.1556	6.55282	30211	170	33	3	9.09091	5.00438	246|6622|7042	ALOX15|SNCA|TGFB2	-1.65319	0	42	0	0	-3.75859	16.1556
1	-3.01618	GO:0030258	M1	1	0	GO Biological Processes	19	lipid modification	19_GO:0008152 metabolic process	-3.01618	15.4295	6.38483	30211	178	33	3	9.09091	5.00438	246|5728|114757	ALOX15|PTEN|CYGB	-1.60214	0	42	0	0	-3.75859	16.1556
1	-2.79125	GO:1901615	M1	1	0	GO Biological Processes	19	organic hydroxy compound metabolic process	19_GO:0008152 metabolic process	-2.79125	7.84141	4.9271	30211	467	33	4	12.1212	5.68144	246|5728|6622|7042	ALOX15|PTEN|SNCA|TGFB2	-1.39651	0	42	0	0	-3.75859	16.1556
1	-2.7693	GO:0010810	M1	1	0	GO Biological Processes	19	regulation of cell-substrate adhesion	19_GO:0022610 biological adhesion	-2.7693	12.6565	5.69858	30211	217	33	3	9.09091	5.00438	246|2932|5728	ALOX15|GSK3B|PTEN	-1.37595	0	42	0	0	-3.75859	16.1556
1	-2.18351	GO:0032535	M1	1	0	GO Biological Processes	19	regulation of cellular component size	19_GO:0065007 biological regulation	-2.18351	7.82466	4.25282	30211	351	33	3	9.09091	5.00438	246|2932|5728	ALOX15|GSK3B|PTEN	-0.83073	0	42	0	0	-3.75859	16.1556
1	-2.14016	GO:0006644	M1	1	0	GO Biological Processes	19	phospholipid metabolic process	19_GO:0008152 metabolic process	-2.14016	7.5452	4.15442	30211	364	33	3	9.09091	5.00438	246|5728|6622	ALOX15|PTEN|SNCA	-0.790546	0	42	0	0	-3.75859	16.1556
1	-2.10479	GO:1902903	M1	1	0	GO Biological Processes	19	regulation of supramolecular fiber organization	19_GO:0050789 regulation of biological process	-2.10479	7.32388	4.07489	30211	375	33	3	9.09091	5.00438	246|5925|6622	ALOX15|RB1|SNCA	-0.757064	0	42	0	0	-3.75859	16.1556
1	-2.69198	GO:0046942	M1	1	0	GO Biological Processes	19	carboxylic acid transport	19_GO:0051179 localization	-2.69198	11.8894	5.49391	30211	231	33	3	9.09091	5.00438	301|4609|6520	ANXA1|MYC|SLC3A2	-1.30692	0	43	1	1	-2.69198	11.8894
1	-2.52329	GO:0015849	M1	1	0	GO Biological Processes	19	organic acid transport	19_GO:0051179 localization	-2.52329	10.364	5.06292	30211	265	33	3	9.09091	5.00438	301|4609|6520	ANXA1|MYC|SLC3A2	-1.15103	0	43	0	0	-2.69198	11.8894
1	-2.32105	GO:0015711	M1	1	0	GO Biological Processes	19	organic anion transport	19_GO:0051179 localization	-2.32105	8.77462	4.57211	30211	313	33	3	9.09091	5.00438	301|4609|6520	ANXA1|MYC|SLC3A2	-0.962526	0	43	0	0	-2.69198	11.8894

## Sheet: CC
_MEMBER_MyList	_LogP_MyList	GO	_PATTERN_	_RANK_	GiniIndex	Category	CategoryID	Description	PARENT_GO	LogP	Enrichment	Z-score	#TotalGeneInLibrary	rich factor	#GeneInGO	#GeneInHitList	#GeneInGOAndHitList	%InGO	STDV %InGO	GeneID	Hits	Log(q-value)	EvidenceCutoff	GROUP_ID	FirstInGroupByEnrichment	FirstInGroupByLogP	BestLogPInGroup	BestEnrichmentInGroup	URL
1	-8.3105	GO:0044297	M1	1	0	GO Cellular Components	20	cell body		-8.3105	15.1459	11.0098	30211	0.0165441	544	33	9	27.2727	7.75275	841|1152|1728|6520|6622|7042|7124|7345|114757	CASP8|CKB|NQO1|SLC3A2|SNCA|TGFB2|TNF|UCHL1|CYGB	-5.02382	0	1	1	1	-8.3105	15.2581
1	-7.42554	GO:0043025	M1	1	0	GO Cellular Components	20	neuronal cell body		-7.42554	15.2581	10.4127	30211	0.0166667	480	33	8	24.2424	7.46009	1152|1728|6520|6622|7042|7124|7345|114757	CKB|NQO1|SLC3A2|SNCA|TGFB2|TNF|UCHL1|CYGB	-4.43989	0	1	0	0	-8.3105	15.2581
1	-3.25501	GO:0030424	M1	1	0	GO Cellular Components	20	axon		-3.25501	7.30052	5.27192	30211	0.00797448	627	33	5	15.1515	6.24156	2932|3315|6622|7042|7345	GSK3B|HSPB1|SNCA|TGFB2|UCHL1	-1.29055	0	1	0	0	-8.3105	15.2581
1	-5.88393	GO:0045121	M1	1	0	GO Cellular Components	20	membrane raft		-5.88393	16.8494	9.51442	30211	0.0184049	326	33	6	18.1818	6.71408	841|1956|3162|5594|5743|7124	CASP8|EGFR|HMOX1|MAPK1|PTGS2|TNF	-3.1916	0	2	1	1	-5.88393	33.4933
1	-5.87622	GO:0098857	M1	1	0	GO Cellular Components	20	membrane microdomain		-5.87622	16.7979	9.49819	30211	0.0183486	327	33	6	18.1818	6.71408	841|1956|3162|5594|5743|7124	CASP8|EGFR|HMOX1|MAPK1|PTGS2|TNF	-3.1916	0	2	0	0	-5.88393	33.4933
1	-4.00373	GO:0005901	M1	1	0	GO Cellular Components	20	caveola		-4.00373	33.4933	9.74308	30211	0.0365854	82	33	3	9.09091	5.00438	3162|5594|5743	HMOX1|MAPK1|PTGS2	-1.74693	0	2	0	0	-5.88393	33.4933
1	-3.93401	GO:0031968	M1	1	0	GO Cellular Components	20	organelle outer membrane		-3.93401	15.7842	7.47517	30211	0.0172414	232	33	4	12.1212	5.68144	841|2182|3162|5743	CASP8|ACSL4|HMOX1|PTGS2	-1.74693	0	2	0	0	-5.88393	33.4933
1	-3.91967	GO:0019867	M1	1	0	GO Cellular Components	20	outer membrane		-3.91967	15.6493	7.43906	30211	0.017094	234	33	4	12.1212	5.68144	841|2182|3162|5743	CASP8|ACSL4|HMOX1|PTGS2	-1.74693	0	2	0	0	-5.88393	33.4933
1	-3.59151	GO:0044853	M1	1	0	GO Cellular Components	20	plasma membrane raft		-3.59151	24.3049	8.20739	30211	0.0265487	113	33	3	9.09091	5.00438	3162|5594|5743	HMOX1|MAPK1|PTGS2	-1.5601	0	2	0	0	-5.88393	33.4933
1	-2.83991	GO:0005741	M1	1	0	GO Cellular Components	20	mitochondrial outer membrane		-2.83991	13.3973	5.88964	30211	0.0146341	205	33	3	9.09091	5.00438	841|2182|3162	CASP8|ACSL4|HMOX1	-0.895648	0	2	0	0	-5.88393	33.4933
1	-2.32879	GO:0005788	M1	1	0	GO Cellular Components	20	endoplasmic reticulum lumen		-2.32879	8.83104	4.59041	30211	0.0096463	311	33	3	9.09091	5.00438	3309|5594|5743	HSPA5|MAPK1|PTGS2	-0.489266	0	2	0	0	-5.88393	33.4933
1	-5.25657	GO:0005925	M1	1	0	GO Cellular Components	20	focal adhesion		-5.25657	13.1096	8.25416	30211	0.0143198	419	33	6	18.1818	6.71408	301|1956|3309|3315|5594|6130	ANXA1|EGFR|HSPA5|HSPB1|MAPK1|RPL7A	-2.69535	0	3	1	1	-5.25657	13.1096
1	-5.20388	GO:0030055	M1	1	0	GO Cellular Components	20	cell-substrate junction		-5.20388	12.8339	8.15366	30211	0.0140187	428	33	6	18.1818	6.71408	301|1956|3309|3315|5594|6130	ANXA1|EGFR|HSPA5|HSPB1|MAPK1|RPL7A	-2.69535	0	3	0	0	-5.25657	13.1096
1	-2.71901	GO:0016323	M1	1	0	GO Cellular Components	20	basolateral plasma membrane		-2.71901	12.1525	5.56493	30211	0.0132743	226	33	3	9.09091	5.00438	301|1956|6520	ANXA1|EGFR|SLC3A2	-0.794054	0	3	0	0	-5.25657	13.1096
1	-2.58978	GO:0009925	M1	1	0	GO Cellular Components	20	basal plasma membrane		-2.58978	10.942	5.23033	30211	0.0119522	251	33	3	9.09091	5.00438	301|1956|6520	ANXA1|EGFR|SLC3A2	-0.683306	0	3	0	0	-5.25657	13.1096
1	-2.50498	GO:0045178	M1	1	0	GO Cellular Components	20	basal part of cell		-2.50498	10.2099	5.01737	30211	0.0111524	269	33	3	9.09091	5.00438	301|1956|6520	ANXA1|EGFR|SLC3A2	-0.616237	0	3	0	0	-5.25657	13.1096
1	-2.15995	GO:0016324	M1	1	0	GO Cellular Components	20	apical plasma membrane		-2.15995	7.67166	4.19922	30211	0.00837989	358	33	3	9.09091	5.00438	301|5728|6520	ANXA1|PTEN|SLC3A2	-0.35039	0	3	0	0	-5.25657	13.1096
1	-2.06444	GO:0005769	M1	1	0	GO Cellular Components	20	early endosome		-2.06444	7.07849	3.98495	30211	0.00773196	388	33	3	9.09091	5.00438	301|1956|5594	ANXA1|EGFR|MAPK1	-0.309234	0	3	0	0	-5.25657	13.1096
1	-4.90552	GO:0005667	M1	1	0	GO Cellular Components	20	transcription regulator complex		-4.90552	11.3725	7.59907	30211	0.0124224	483	33	6	18.1818	6.71408	3725|4609|4780|5925|5970|7157	JUN|MYC|NFE2L2|RB1|RELA|TP53	-2.46393	0	4	1	1	-4.90552	36.1376
1	-4.10207	GO:0017053	M1	1	0	GO Cellular Components	20	transcription repressor complex		-4.10207	36.1376	10.1421	30211	0.0394737	76	33	3	9.09091	5.00438	3725|4609|7157	JUN|MYC|TP53	-1.76964	0	4	0	0	-4.90552	36.1376
1	-3.94848	GO:0090575	M1	1	0	GO Cellular Components	20	RNA polymerase II transcription regulator complex		-3.94848	15.9215	7.51173	30211	0.0173913	230	33	4	12.1212	5.68144	3725|4609|4780|5925	JUN|MYC|NFE2L2|RB1	-1.74693	0	4	0	0	-4.90552	36.1376
1	-4.57409	GO:0031983	M1	1	0	GO Cellular Components	20	vesicle lumen		-4.57409	13.9982	7.81495	30211	0.0152905	327	33	5	15.1515	6.24156	1956|2950|5594|7040|7042	EGFR|GSTP1|MAPK1|TGFB1|TGFB2	-2.1905	0	5	1	1	-4.57409	30.1808
1	-3.86935	GO:0031091	M1	1	0	GO Cellular Components	20	platelet alpha granule		-3.86935	30.1808	9.21887	30211	0.032967	91	33	3	9.09091	5.00438	6622|7040|7042	SNCA|TGFB1|TGFB2	-1.7288	0	5	0	0	-4.57409	30.1808
1	-3.39136	GO:0034774	M1	1	0	GO Cellular Components	20	secretory granule lumen		-3.39136	11.3725	6.18788	30211	0.0124224	322	33	4	12.1212	5.68144	2950|5594|7040|7042	GSTP1|MAPK1|TGFB1|TGFB2	-1.39052	0	5	0	0	-4.57409	30.1808
1	-3.37617	GO:0060205	M1	1	0	GO Cellular Components	20	cytoplasmic vesicle lumen		-3.37617	11.2675	6.15403	30211	0.0123077	325	33	4	12.1212	5.68144	2950|5594|7040|7042	GSTP1|MAPK1|TGFB1|TGFB2	-1.39052	0	5	0	0	-4.57409	30.1808
1	-3.68549	GO:0016605	M1	1	0	GO Cellular Components	20	PML body		-3.68549	26.1567	8.53904	30211	0.0285714	105	33	3	9.09091	5.00438	5728|5925|7157	PTEN|RB1|TP53	-1.58137	0	6	1	1	-3.68549	26.1567
1	-3.6376	GO:0042470	M1	1	0	GO Cellular Components	20	melanosome		-3.6376	25.1968	8.36876	30211	0.0275229	109	33	3	9.09091	5.00438	2194|3309|6520	FASN|HSPA5|SLC3A2	-1.58137	0	7	1	1	-3.6376	25.1968
1	-3.6376	GO:0048770	M1	1	0	GO Cellular Components	20	pigment granule		-3.6376	25.1968	8.36876	30211	0.0275229	109	33	3	9.09091	5.00438	2194|3309|6520	FASN|HSPA5|SLC3A2	-1.58137	0	7	0	0	-3.6376	25.1968
1	-2.37596	GO:0030425	M1	1	0	GO Cellular Components	20	dendrite		-2.37596	6.01304	4.13272	30211	0.00656814	609	33	4	12.1212	5.68144	1152|1728|2932|4734	CKB|NQO1|GSK3B|NEDD4	-0.515594	0	8	1	1	-2.37596	6.01304
1	-2.37091	GO:0097447	M1	1	0	GO Cellular Components	20	dendritic tree		-2.37091	5.99335	4.12339	30211	0.00654665	611	33	4	12.1212	5.68144	1152|1728|2932|4734	CKB|NQO1|GSK3B|NEDD4	-0.515594	0	8	0	0	-2.37596	6.01304
1	-2.23681	GO:0098552	M1	1	0	GO Cellular Components	20	side of membrane		-2.23681	5.49016	3.87773	30211	0.005997	667	33	4	12.1212	5.68144	246|301|5728|7124	ALOX15|ANXA1|PTEN|TNF	-0.412531	0	9	1	1	-2.23681	5.49016
1	-2.12338	GO:0048471	M1	1	0	GO Cellular Components	20	perinuclear region of cytoplasm		-2.12338	5.0931	3.67326	30211	0.00556328	719	33	4	12.1212	5.68144	1956|3162|4734|6622	EGFR|HMOX1|NEDD4|SNCA	-0.340671	0	10	1	1	-2.12338	5.0931
1	-2.10884	GO:0000323	M1	1	0	GO Cellular Components	20	lytic vacuole		-2.10884	5.04399	3.64725	30211	0.00550964	726	33	4	12.1212	5.68144	5594|6520|6622|7128	MAPK1|SLC3A2|SNCA|TNFAIP3	-0.340671	0	11	1	1	-2.10884	5.04399
1	-2.10884	GO:0005764	M1	1	0	GO Cellular Components	20	lysosome		-2.10884	5.04399	3.64725	30211	0.00550964	726	33	4	12.1212	5.68144	5594|6520|6622|7128	MAPK1|SLC3A2|SNCA|TNFAIP3	-0.340671	0	11	0	0	-2.10884	5.04399
1	-2.02262	GO:0005819	M1	1	0	GO Cellular Components	20	spindle		-2.02262	6.83198	3.89262	30211	0.00746269	402	33	3	9.09091	5.00438	3315|5594|5925	HSPB1|MAPK1|RB1	-0.280007	0	12	1	1	-2.02262	6.83198

## Sheet: MF
_MEMBER_MyList	_LogP_MyList	GO	_PATTERN_	_RANK_	GiniIndex	Category	CategoryID	Description	PARENT_GO	LogP	Enrichment	Z-score	#TotalGeneInLibrary	rich factor	#GeneInGO	#GeneInHitList	#GeneInGOAndHitList	%InGO	STDV %InGO	GeneID	Hits	Log(q-value)	EvidenceCutoff	GROUP_ID	FirstInGroupByEnrichment	FirstInGroupByLogP	BestLogPInGroup	BestEnrichmentInGroup	URL
1	-12.2456	GO:0031625	M1	1	0	GO Molecular Functions	21	ubiquitin protein ligase binding		-12.2456	30.721	17.0501	30211	0.033557	298	33	10	30.303	8.00006	841|1152|1956|2932|3309|3725|5925|5970|7157|7345	CASP8|CKB|EGFR|GSK3B|HSPA5|JUN|RB1|RELA|TP53|UCHL1	-8.59576	0	1	1	1	-12.2456	30.721
1	-11.9789	GO:0044389	M1	1	0	GO Molecular Functions	21	ubiquitin-like protein ligase binding		-11.9789	28.8796	16.5011	30211	0.0315457	317	33	10	30.303	8.00006	841|1152|1956|2932|3309|3725|5925|5970|7157|7345	CASP8|CKB|EGFR|GSK3B|HSPA5|JUN|RB1|RELA|TP53|UCHL1	-8.59576	0	1	0	0	-12.2456	30.721
1	-6.23906	GO:0019904	M1	1	0	GO Molecular Functions	21	protein domain specific binding		-6.23906	10.6607	8.47003	30211	0.0116448	687	33	8	24.2424	7.46009	841|3309|4734|4780|5728|5925|5970|7157	CASP8|HSPA5|NEDD4|NFE2L2|PTEN|RB1|RELA|TP53	-3.45793	0	1	0	0	-12.2456	30.721
1	-7.50314	GO:0140297	M1	1	0	GO Molecular Functions	21	DNA-binding transcription factor binding		-7.50314	15.6159	10.5491	30211	0.0170576	469	33	8	24.2424	7.46009	2932|3315|3725|4609|4780|5925|5970|7157	GSK3B|HSPB1|JUN|MYC|NFE2L2|RB1|RELA|TP53	-4.29604	0	2	1	1	-7.50314	65.3918
1	-7.08595	GO:0061629	M1	1	0	GO Molecular Functions	21	RNA polymerase II-specific DNA-binding transcription factor binding		-7.08595	18.468	10.8223	30211	0.0201729	347	33	7	21.2121	7.11647	2932|3315|3725|4780|5925|5970|7157	GSK3B|HSPB1|JUN|NFE2L2|RB1|RELA|TP53	-4.1007	0	2	0	0	-7.50314	65.3918
1	-6.7171	GO:0008134	M1	1	0	GO Molecular Functions	21	transcription factor binding		-6.7171	12.3298	9.22212	30211	0.013468	594	33	8	24.2424	7.46009	2932|3315|3725|4609|4780|5925|5970|7157	GSK3B|HSPB1|JUN|MYC|NFE2L2|RB1|RELA|TP53	-3.81104	0	2	0	0	-7.50314	65.3918
1	-4.8781	GO:0001046	M1	1	0	GO Molecular Functions	21	core promoter sequence-specific DNA binding		-4.8781	65.3918	13.809	30211	0.0714286	42	33	3	9.09091	5.00438	4609|5970|7157	MYC|RELA|TP53	-2.36997	0	2	0	0	-7.50314	65.3918
1	-4.59688	GO:0140296	M1	1	0	GO Molecular Functions	21	general transcription initiation factor binding		-4.59688	52.8164	12.3665	30211	0.0576923	52	33	3	9.09091	5.00438	3725|5970|7157	JUN|RELA|TP53	-2.14311	0	2	0	0	-7.50314	65.3918
1	-3.86511	GO:0001228	M1	1	0	GO Molecular Functions	21	DNA-binding transcription activator activity, RNA polymerase II-specific		-3.86511	9.90784	6.38035	30211	0.0108225	462	33	5	15.1515	6.24156	3725|4609|4780|5970|7157	JUN|MYC|NFE2L2|RELA|TP53	-1.50586	0	2	0	0	-7.50314	65.3918
1	-3.84765	GO:0001216	M1	1	0	GO Molecular Functions	21	DNA-binding transcription activator activity		-3.84765	9.8228	6.34716	30211	0.0107296	466	33	5	15.1515	6.24156	3725|4609|4780|5970|7157	JUN|MYC|NFE2L2|RELA|TP53	-1.50586	0	2	0	0	-7.50314	65.3918
1	-3.6494	GO:0001221	M1	1	0	GO Molecular Functions	21	transcription coregulator binding		-3.6494	25.4301	8.41046	30211	0.0277778	108	33	3	9.09091	5.00438	4609|4780|5970	MYC|NFE2L2|RELA	-1.34539	0	2	0	0	-7.50314	65.3918
1	-3.39645	GO:0001227	M1	1	0	GO Molecular Functions	21	DNA-binding transcription repressor activity, RNA polymerase II-specific		-3.39645	11.4079	6.19927	30211	0.0124611	321	33	4	12.1212	5.68144	3725|4609|5970|7157	JUN|MYC|RELA|TP53	-1.11018	0	2	0	0	-7.50314	65.3918
1	-3.37617	GO:0001217	M1	1	0	GO Molecular Functions	21	DNA-binding transcription repressor activity		-3.37617	11.2675	6.15403	30211	0.0123077	325	33	4	12.1212	5.68144	3725|4609|5970|7157	JUN|MYC|RELA|TP53	-1.10693	0	2	0	0	-7.50314	65.3918
1	-2.44065	GO:0003682	M1	1	0	GO Molecular Functions	21	chromatin binding		-2.44065	6.27044	4.25301	30211	0.00684931	584	33	4	12.1212	5.68144	1956|3725|5970|7157	EGFR|JUN|RELA|TP53	-0.312737	0	2	0	0	-7.50314	65.3918
1	-7.09757	GO:0019900	M1	1	0	GO Molecular Functions	21	kinase binding		-7.09757	10.942	9.13606	30211	0.0119522	753	33	9	27.2727	7.75275	1956|2932|2950|3315|5728|5925|5970|7128|7157	EGFR|GSK3B|GSTP1|HSPB1|PTEN|RB1|RELA|TNFAIP3|TP53	-4.1007	0	3	1	1	-7.09757	33.6575
1	-6.4339	GO:0002020	M1	1	0	GO Molecular Functions	21	protease binding		-6.4339	33.6575	12.6223	30211	0.0367647	136	33	5	15.1515	6.24156	2932|5728|7124|7128|7157	GSK3B|PTEN|TNF|TNFAIP3|TP53	-3.59478	0	3	0	0	-7.09757	33.6575
1	-4.10807	GO:0019901	M1	1	0	GO Molecular Functions	21	protein kinase binding		-4.10807	8.18615	6.225	30211	0.00894188	671	33	6	18.1818	6.71408	2932|2950|3315|5728|5970|7157	GSK3B|GSTP1|HSPB1|PTEN|RELA|TP53	-1.72489	0	3	0	0	-7.09757	33.6575
1	-6.01439	GO:0016491	M1	1	0	GO Molecular Functions	21	oxidoreductase activity		-6.01439	9.95092	8.12956	30211	0.0108696	736	33	8	24.2424	7.46009	246|1728|2194|2950|3162|5743|6622|114757	ALOX15|NQO1|FASN|GSTP1|HMOX1|PTGS2|SNCA|CYGB	-3.28441	0	4	1	1	-6.01439	52.8164
1	-5.64907	GO:0016209	M1	1	0	GO Molecular Functions	21	antioxidant activity		-5.64907	43.0816	12.8475	30211	0.0470588	85	33	4	12.1212	5.68144	1728|2950|5743|114757	NQO1|GSTP1|PTGS2|CYGB	-3.00625	0	4	0	0	-6.01439	52.8164
1	-4.59688	GO:0004601	M1	1	0	GO Molecular Functions	21	peroxidase activity		-4.59688	52.8164	12.3665	30211	0.0576923	52	33	3	9.09091	5.00438	2950|5743|114757	GSTP1|PTGS2|CYGB	-2.14311	0	4	0	0	-6.01439	52.8164
1	-4.49977	GO:0016684	M1	1	0	GO Molecular Functions	21	oxidoreductase activity, acting on peroxide as acceptor		-4.49977	49.0438	11.8998	30211	0.0535714	56	33	3	9.09091	5.00438	2950|5743|114757	GSTP1|PTGS2|CYGB	-2.09431	0	4	0	0	-6.01439	52.8164
1	-3.3279	GO:0020037	M1	1	0	GO Molecular Functions	21	heme binding		-3.3279	19.7587	7.33019	30211	0.0215827	139	33	3	9.09091	5.00438	3162|5743|114757	HMOX1|PTGS2|CYGB	-1.07505	0	4	0	0	-6.01439	52.8164
1	-3.23998	GO:0046906	M1	1	0	GO Molecular Functions	21	tetrapyrrole binding		-3.23998	18.4326	7.05396	30211	0.0201342	149	33	3	9.09091	5.00438	3162|5743|114757	HMOX1|PTGS2|CYGB	-1.00292	0	4	0	0	-6.01439	52.8164
1	-5.83049	GO:0045296	M1	1	0	GO Molecular Functions	21	cadherin binding		-5.83049	16.4952	9.40224	30211	0.018018	333	33	6	18.1818	6.71408	301|1956|2194|3309|6130|6520	ANXA1|EGFR|FASN|HSPA5|RPL7A|SLC3A2	-3.14627	0	5	1	1	-5.83049	16.4952
1	-4.55705	GO:0050839	M1	1	0	GO Molecular Functions	21	cell adhesion molecule binding		-4.55705	9.8616	6.98048	30211	0.010772	557	33	6	18.1818	6.71408	301|1956|2194|3309|6130|6520	ANXA1|EGFR|FASN|HSPA5|RPL7A|SLC3A2	-2.12811	0	5	0	0	-5.83049	16.4952
1	-5.58874	GO:0051219	M1	1	0	GO Molecular Functions	21	phosphoprotein binding		-5.58874	41.6129	12.6166	30211	0.0454545	88	33	4	12.1212	5.68144	4734|5594|5925|6622	NEDD4|MAPK1|RB1|SNCA	-2.98371	0	6	1	1	-5.58874	41.6129
1	-5.43772	GO:0043130	M1	1	0	GO Molecular Functions	21	ubiquitin binding		-5.43772	38.1452	12.0541	30211	0.0416667	96	33	4	12.1212	5.68144	3315|4734|7128|7345	HSPB1|NEDD4|TNFAIP3|UCHL1	-2.86745	0	7	1	1	-5.43772	38.1452
1	-5.11086	GO:0032182	M1	1	0	GO Molecular Functions	21	ubiquitin-like protein binding		-5.11086	31.5684	10.9079	30211	0.0344828	116	33	4	12.1212	5.68144	3315|4734|7128|7345	HSPB1|NEDD4|TNFAIP3|UCHL1	-2.57277	0	7	0	0	-5.43772	38.1452
1	-2.92803	GO:0008234	M1	1	0	GO Molecular Functions	21	cysteine-type peptidase activity		-2.92803	14.3793	6.13385	30211	0.0157068	191	33	3	9.09091	5.00438	841|7128|7345	CASP8|TNFAIP3|UCHL1	-0.735963	0	7	0	0	-5.43772	38.1452
1	-3.67545	GO:0005126	M1	1	0	GO Molecular Functions	21	cytokine receptor binding		-3.67545	13.5127	6.84221	30211	0.0147601	271	33	4	12.1212	5.68144	841|7040|7042|7124	CASP8|TGFB1|TGFB2|TNF	-1.35296	0	8	1	1	-3.67545	13.5127
1	-2.6708	GO:0005125	M1	1	0	GO Molecular Functions	21	cytokine activity		-2.6708	11.687	5.43866	30211	0.012766	235	33	3	9.09091	5.00438	7040|7042|7124	TGFB1|TGFB2|TNF	-0.530654	0	8	0	0	-3.67545	13.5127
1	-3.22313	GO:0005506	M1	1	0	GO Molecular Functions	21	iron ion binding		-3.22313	18.1884	7.00193	30211	0.0198676	151	33	3	9.09091	5.00438	246|6622|114757	ALOX15|SNCA|CYGB	-1.00131	0	9	1	1	-3.22313	18.1884
1	-2.7946	GO:0008289	M1	1	0	GO Molecular Functions	21	lipid binding		-2.7946	5.75777	4.49554	30211	0.00628931	795	33	5	15.1515	6.24156	246|301|2950|5728|6622	ALOX15|ANXA1|GSTP1|PTEN|SNCA	-0.628894	0	9	0	0	-3.22313	18.1884
1	-2.6708	GO:0019207	M1	1	0	GO Molecular Functions	21	kinase regulator activity		-2.6708	11.687	5.43866	30211	0.012766	235	33	3	9.09091	5.00438	2950|3315|6622	GSTP1|HSPB1|SNCA	-0.530654	0	9	0	0	-3.22313	18.1884
1	-2.05836	GO:0004857	M1	1	0	GO Molecular Functions	21	enzyme inhibitor activity		-2.05836	7.04219	3.97148	30211	0.00769231	390	33	3	9.09091	5.00438	301|3315|6622	ANXA1|HSPB1|SNCA	0	0	9	0	0	-3.22313	18.1884
1	-3.0961	GO:0042803	M1	1	0	GO Molecular Functions	21	protein homodimerization activity		-3.0961	6.73151	4.99886	30211	0.00735294	680	33	5	15.1515	6.24156	3162|3315|5743|5970|7042	HMOX1|HSPB1|PTGS2|RELA|TGFB2	-0.889004	0	10	1	1	-3.0961	6.91802
1	-2.03737	GO:0033218	M1	1	0	GO Molecular Functions	21	amide binding		-2.03737	6.91802	3.92508	30211	0.00755667	397	33	3	9.09091	5.00438	2194|5970|7042	FASN|RELA|TGFB2	0	0	10	0	0	-3.0961	6.91802
1	-2.91503	GO:0019902	M1	1	0	GO Molecular Functions	21	phosphatase binding		-2.91503	14.2303	6.09741	30211	0.015544	193	33	3	9.09091	5.00438	1956|5594|7157	EGFR|MAPK1|TP53	-0.735963	0	11	1	1	-2.91503	14.2303
1	-2.10265	GO:0016301	M1	1	0	GO Molecular Functions	21	kinase activity		-2.10265	5.02324	3.6362	30211	0.00548697	729	33	4	12.1212	5.68144	1152|1956|2932|5594	CKB|EGFR|GSK3B|MAPK1	0	0	11	0	0	-2.91503	14.2303

## Sheet: KEGG
_MEMBER_MyList	_LogP_MyList	GO	_PATTERN_	_RANK_	GiniIndex	Category	CategoryID	Description	PARENT_GO	LogP	Enrichment	Z-score	#TotalGeneInLibrary	rich factor	#GeneInGO	#GeneInHitList	#GeneInGOAndHitList	%InGO	STDV %InGO	GeneID	Hits	Log(q-value)	EvidenceCutoff	GROUP_ID	FirstInGroupByEnrichment	FirstInGroupByLogP	BestLogPInGroup	BestEnrichmentInGroup	URL
1	-20.9923	hsa05200	M1	1	0	KEGG Pathway	24	Pathways in cancer		-20.9923	29.3093	21.7636	30211	0.0320151	531	33	17	51.5152	8.69989	841|1728|1956|2932|2950|3162|3725|4609|4780|5594|5728|5743|5925|5970|7040|7042|7157	CASP8|NQO1|EGFR|GSK3B|GSTP1|HMOX1|JUN|MYC|NFE2L2|MAPK1|PTEN|PTGS2|RB1|RELA|TGFB1|TGFB2|TP53	-18.5665	0	1	1	1	-20.9923	70.8411
1	-20.8021	hsa05225	M1	1	0	KEGG Pathway	24	Hepatocellular carcinoma		-20.8021	70.8411	30.018	30211	0.077381	168	33	13	39.3939	8.50581	1728|1956|2932|2950|3162|4609|4780|5594|5728|5925|7040|7042|7157	NQO1|EGFR|GSK3B|GSTP1|HMOX1|MYC|NFE2L2|MAPK1|PTEN|RB1|TGFB1|TGFB2|TP53	-18.5665	0	1	0	0	-20.9923	70.8411
1	-8.90389	hsa05206	M1	1	0	KEGG Pathway	24	MicroRNAs in cancer		-8.90389	23.6254	13.241	30211	0.0258065	310	33	8	24.2424	7.46009	1956|3162|4609|5594|5728|5743|7042|7157	EGFR|HMOX1|MYC|MAPK1|PTEN|PTGS2|TGFB2|TP53	-7.84445	0	1	0	0	-20.9923	70.8411
1	-6.5148	hsa04068	M1	1	0	KEGG Pathway	24	FoxO signaling pathway		-6.5148	34.9422	12.8743	30211	0.0381679	131	33	5	15.1515	6.24156	1956|5594|5728|7040|7042	EGFR|MAPK1|PTEN|TGFB1|TGFB2	-5.77759	0	1	0	0	-20.9923	70.8411
1	-14.9083	hsa05161	M1	1	0	KEGG Pathway	24	Hepatitis B		-14.9083	56.5114	23.4267	30211	0.0617284	162	33	10	30.303	8.00006	841|3725|4609|5594|5925|5970|7040|7042|7124|7157	CASP8|JUN|MYC|MAPK1|RB1|RELA|TGFB1|TGFB2|TNF|TP53	-12.8489	0	2	1	1	-14.9083	85.1614
1	-13.5243	hsa05166	M1	1	0	KEGG Pathway	24	Human T-cell leukemia virus 1 infection		-13.5243	41.2381	19.8985	30211	0.045045	222	33	10	30.303	8.00006	3725|4609|5594|5728|5925|5970|7040|7042|7124|7157	JUN|MYC|MAPK1|PTEN|RB1|RELA|TGFB1|TGFB2|TNF|TP53	-11.6347	0	2	0	0	-14.9083	85.1614
1	-13.3931	hsa05210	M1	1	0	KEGG Pathway	24	Colorectal cancer		-13.3931	85.1614	25.8455	30211	0.0930233	86	33	8	24.2424	7.46009	1956|2932|3725|4609|5594|7040|7042|7157	EGFR|GSK3B|JUN|MYC|MAPK1|TGFB1|TGFB2|TP53	-11.6347	0	2	0	0	-14.9083	85.1614
1	-12.304	hsa04010	M1	1	0	KEGG Pathway	24	MAPK signaling pathway		-12.304	31.1389	17.1723	30211	0.0340136	294	33	10	30.303	8.00006	1956|3315|3725|4609|5594|5970|7040|7042|7124|7157	EGFR|HSPB1|JUN|MYC|MAPK1|RELA|TGFB1|TGFB2|TNF|TP53	-10.7888	0	2	0	0	-14.9083	85.1614
1	-11.7107	hsa05212	M1	1	0	KEGG Pathway	24	Pancreatic cancer		-11.7107	84.321	24.0499	30211	0.0921053	76	33	7	21.2121	7.11647	1956|5594|5925|5970|7040|7042|7157	EGFR|MAPK1|RB1|RELA|TGFB1|TGFB2|TP53	-10.3883	0	2	0	0	-14.9083	85.1614
1	-11.7107	hsa05220	M1	1	0	KEGG Pathway	24	Chronic myeloid leukemia		-11.7107	84.321	24.0499	30211	0.0921053	76	33	7	21.2121	7.11647	4609|5594|5925|5970|7040|7042|7157	MYC|MAPK1|RB1|RELA|TGFB1|TGFB2|TP53	-10.3883	0	2	0	0	-14.9083	85.1614
1	-11.6696	hsa05140	M1	1	0	KEGG Pathway	24	Leishmaniasis		-11.6696	83.2259	23.8898	30211	0.0909091	77	33	7	21.2121	7.11647	3725|5594|5743|5970|7040|7042|7124	JUN|MAPK1|PTGS2|RELA|TGFB1|TGFB2|TNF	-10.3883	0	2	0	0	-14.9083	85.1614
1	-11.4411	hsa05226	M1	1	0	KEGG Pathway	24	Gastric cancer		-11.4411	49.1535	19.485	30211	0.0536913	149	33	8	24.2424	7.46009	1956|2932|4609|5594|5925|7040|7042|7157	EGFR|GSK3B|MYC|MAPK1|RB1|TGFB1|TGFB2|TP53	-10.2055	0	2	0	0	-14.9083	85.1614
1	-11.28	hsa04218	M1	1	0	KEGG Pathway	24	Cellular senescence		-11.28	46.9479	19.0264	30211	0.0512821	156	33	8	24.2424	7.46009	4609|5594|5728|5925|5970|7040|7042|7157	MYC|MAPK1|PTEN|RB1|RELA|TGFB1|TGFB2|TP53	-10.0657	0	2	0	0	-14.9083	85.1614
1	-10.7925	hsa05142	M1	1	0	KEGG Pathway	24	Chagas disease		-10.7925	62.8274	20.6833	30211	0.0686275	102	33	7	21.2121	7.11647	841|3725|5594|5970|7040|7042|7124	CASP8|JUN|MAPK1|RELA|TGFB1|TGFB2|TNF	-9.59837	0	2	0	0	-14.9083	85.1614
1	-8.93409	hsa04933	M1	1	0	KEGG Pathway	24	AGE-RAGE signaling pathway in diabetic complications		-8.93409	54.9291	17.8627	30211	0.06	100	33	6	18.1818	6.71408	3725|5594|5970|7040|7042|7124	JUN|MAPK1|RELA|TGFB1|TGFB2|TNF	-7.85993	0	2	0	0	-14.9083	85.1614
1	-8.65781	hsa05205	M1	1	0	KEGG Pathway	24	Proteoglycans in cancer		-8.65781	31.2605	14.3759	30211	0.0341463	205	33	7	21.2121	7.11647	1956|4609|5594|7040|7042|7124|7157	EGFR|MYC|MAPK1|TGFB1|TGFB2|TNF|TP53	-7.63977	0	2	0	0	-14.9083	85.1614
1	-8.63555	hsa05145	M1	1	0	KEGG Pathway	24	Toxoplasmosis		-8.63555	49.0438	16.8445	30211	0.0535714	112	33	6	18.1818	6.71408	841|5594|5970|7040|7042|7124	CASP8|MAPK1|RELA|TGFB1|TGFB2|TNF	-7.63047	0	2	0	0	-14.9083	85.1614
1	-8.32663	hsa04110	M1	1	0	KEGG Pathway	24	Cell cycle		-8.32663	43.5945	15.8435	30211	0.047619	126	33	6	18.1818	6.71408	2932|4609|5925|7040|7042|7157	GSK3B|MYC|RB1|TGFB1|TGFB2|TP53	-7.33414	0	2	0	0	-14.9083	85.1614
1	-8.28543	hsa04380	M1	1	0	KEGG Pathway	24	Osteoclast differentiation		-8.28543	42.9134	15.7139	30211	0.046875	128	33	6	18.1818	6.71408	3725|5594|5970|7040|7042|7124	JUN|MAPK1|RELA|TGFB1|TGFB2|TNF	-7.30517	0	2	0	0	-14.9083	85.1614
1	-8.0493	hsa05321	M1	1	0	KEGG Pathway	24	Inflammatory bowel disease		-8.0493	70.4219	18.5279	30211	0.0769231	65	33	5	15.1515	6.24156	3725|5970|7040|7042|7124	JUN|RELA|TGFB1|TGFB2|TNF	-7.1148	0	2	0	0	-14.9083	85.1614
1	-7.39932	hsa05152	M1	1	0	KEGG Pathway	24	Tuberculosis		-7.39932	30.5162	13.134	30211	0.0333333	180	33	6	18.1818	6.71408	841|5594|5970|7040|7042|7124	CASP8|MAPK1|RELA|TGFB1|TGFB2|TNF	-6.52552	0	2	0	0	-14.9083	85.1614
1	-7.23651	hsa04350	M1	1	0	KEGG Pathway	24	TGF-beta signaling pathway		-7.23651	48.696	15.3154	30211	0.0531915	94	33	5	15.1515	6.24156	4609|5594|7040|7042|7124	MYC|MAPK1|TGFB1|TGFB2|TNF	-6.39015	0	2	0	0	-14.9083	85.1614
1	-7.0581	hsa05146	M1	1	0	KEGG Pathway	24	Amoebiasis		-7.0581	44.8767	14.6782	30211	0.0490196	102	33	5	15.1515	6.24156	3315|5970|7040|7042|7124	HSPB1|RELA|TGFB1|TGFB2|TNF	-6.23754	0	2	0	0	-14.9083	85.1614
1	-6.01335	hsa05211	M1	1	0	KEGG Pathway	24	Renal cell carcinoma		-6.01335	53.0716	14.3195	30211	0.057971	69	33	4	12.1212	5.68144	3725|5594|7040|7042	JUN|MAPK1|TGFB1|TGFB2	-5.30286	0	2	0	0	-14.9083	85.1614
1	-5.49278	hsa05323	M1	1	0	KEGG Pathway	24	Rheumatoid arthritis		-5.49278	39.3757	12.2566	30211	0.0430108	93	33	4	12.1212	5.68144	3725|7040|7042|7124	JUN|TGFB1|TGFB2|TNF	-4.83703	0	2	0	0	-14.9083	85.1614
1	-4.64837	hsa05144	M1	1	0	KEGG Pathway	24	Malaria		-4.64837	54.9291	12.6204	30211	0.06	50	33	3	9.09091	5.00438	7040|7042|7124	TGFB1|TGFB2|TNF	-4.04123	0	2	0	0	-14.9083	85.1614
1	-4.5928	hsa04390	M1	1	0	KEGG Pathway	24	Hippo signaling pathway		-4.5928	23.3245	9.27399	30211	0.0254777	157	33	4	12.1212	5.68144	2932|4609|7040|7042	GSK3B|MYC|TGFB1|TGFB2	-4.00072	0	2	0	0	-14.9083	85.1614
1	-3.88359	hsa05410	M1	1	0	KEGG Pathway	24	Hypertrophic cardiomyopathy		-3.88359	30.5162	9.27328	30211	0.0333333	90	33	3	9.09091	5.00438	7040|7042|7124	TGFB1|TGFB2|TNF	-3.35135	0	2	0	0	-14.9083	85.1614
1	-3.80052	hsa05414	M1	1	0	KEGG Pathway	24	Dilated cardiomyopathy		-3.80052	28.6089	8.95943	30211	0.03125	96	33	3	9.09091	5.00438	7040|7042|7124	TGFB1|TGFB2|TNF	-3.28099	0	2	0	0	-14.9083	85.1614
1	-2.39269	hsa04060	M1	1	0	KEGG Pathway	24	Cytokine-cytokine receptor interaction		-2.39269	9.31002	4.74295	30211	0.0101695	295	33	3	9.09091	5.00438	7040|7042|7124	TGFB1|TGFB2|TNF	-1.92059	0	2	0	0	-14.9083	85.1614
1	-13.4657	hsa05163	M1	1	0	KEGG Pathway	24	Human cytomegalovirus infection		-13.4657	40.6882	19.7597	30211	0.0444444	225	33	10	30.303	8.00006	841|1956|2932|4609|5594|5743|5925|5970|7124|7157	CASP8|EGFR|GSK3B|MYC|MAPK1|PTGS2|RB1|RELA|TNF|TP53	-11.6347	0	3	1	1	-13.4657	111.644
1	-13.1191	hsa05160	M1	1	0	KEGG Pathway	24	Hepatitis C		-13.1191	52.48	21.3858	30211	0.0573248	157	33	9	27.2727	7.75275	841|1956|2932|4609|5594|5925|5970|7124|7157	CASP8|EGFR|GSK3B|MYC|MAPK1|RB1|RELA|TNF|TP53	-11.4404	0	3	0	0	-13.4657	111.644
1	-12.9614	hsa05215	M1	1	0	KEGG Pathway	24	Prostate cancer		-12.9614	75.5039	24.3034	30211	0.0824742	97	33	8	24.2424	7.46009	1956|2932|2950|5594|5728|5925|5970|7157	EGFR|GSK3B|GSTP1|MAPK1|PTEN|RB1|RELA|TP53	-11.3791	0	3	0	0	-13.4657	111.644
1	-12.2839	hsa05167	M1	1	0	KEGG Pathway	24	Kaposi sarcoma-associated herpesvirus infection		-12.2839	42.4709	19.1623	30211	0.0463918	194	33	9	27.2727	7.75275	841|2932|3725|4609|5594|5743|5925|5970|7157	CASP8|GSK3B|JUN|MYC|MAPK1|PTGS2|RB1|RELA|TP53	-10.7888	0	3	0	0	-13.4657	111.644
1	-11.7928	hsa05165	M1	1	0	KEGG Pathway	24	Human papillomavirus infection		-11.7928	27.6582	16.1265	30211	0.0302115	331	33	10	30.303	8.00006	841|1956|2932|5594|5728|5743|5925|5970|7124|7157	CASP8|EGFR|GSK3B|MAPK1|PTEN|PTGS2|RB1|RELA|TNF|TP53	-10.4024	0	3	0	0	-13.4657	111.644
1	-11.4885	hsa05224	M1	1	0	KEGG Pathway	24	Breast cancer		-11.4885	49.8223	19.6219	30211	0.0544218	147	33	8	24.2424	7.46009	1956|2932|3725|4609|5594|5728|5925|7157	EGFR|GSK3B|JUN|MYC|MAPK1|PTEN|RB1|TP53	-10.2307	0	3	0	0	-13.4657	111.644
1	-10.3892	hsa05213	M1	1	0	KEGG Pathway	24	Endometrial cancer		-10.3892	94.7053	23.6211	30211	0.103448	58	33	6	18.1818	6.71408	1956|2932|4609|5594|5728|7157	EGFR|GSK3B|MYC|MAPK1|PTEN|TP53	-9.23285	0	3	0	0	-13.4657	111.644
1	-9.15458	hsa05222	M1	1	0	KEGG Pathway	24	Small cell lung cancer		-9.15458	59.7055	18.6483	30211	0.0652174	92	33	6	18.1818	6.71408	4609|5728|5743|5925|5970|7157	MYC|PTEN|PTGS2|RB1|RELA|TP53	-8.033	0	3	0	0	-13.4657	111.644
1	-9.08351	hsa05219	M1	1	0	KEGG Pathway	24	Bladder cancer		-9.08351	111.644	23.4434	30211	0.121951	41	33	5	15.1515	6.24156	1956|4609|5594|5925|7157	EGFR|MYC|MAPK1|RB1|TP53	-7.99411	0	3	0	0	-13.4657	111.644
1	-7.88506	hsa05230	M1	1	0	KEGG Pathway	24	Central carbon metabolism in cancer		-7.88506	65.3918	17.8356	30211	0.0714286	70	33	5	15.1515	6.24156	1956|4609|5594|5728|7157	EGFR|MYC|MAPK1|PTEN|TP53	-6.96129	0	3	0	0	-13.4657	111.644
1	-7.82276	hsa05218	M1	1	0	KEGG Pathway	24	Melanoma		-7.82276	63.5753	17.5789	30211	0.0694444	72	33	5	15.1515	6.24156	1956|5594|5728|5925|7157	EGFR|MAPK1|PTEN|RB1|TP53	-6.90945	0	3	0	0	-13.4657	111.644
1	-7.73261	hsa05214	M1	1	0	KEGG Pathway	24	Glioma		-7.73261	61.0323	17.2131	30211	0.0666667	75	33	5	15.1515	6.24156	1956|5594|5728|5925|7157	EGFR|MAPK1|PTEN|RB1|TP53	-6.8395	0	3	0	0	-13.4657	111.644
1	-7.14542	hsa01522	M1	1	0	KEGG Pathway	24	Endocrine resistance		-7.14542	46.7084	14.9872	30211	0.0510204	98	33	5	15.1515	6.24156	1956|3725|5594|5925|7157	EGFR|JUN|MAPK1|RB1|TP53	-6.30783	0	3	0	0	-13.4657	111.644
1	-7.07684	hsa05203	M1	1	0	KEGG Pathway	24	Viral carcinogenesis		-7.07684	26.926	12.2865	30211	0.0294118	204	33	6	18.1818	6.71408	841|3725|5594|5925|5970|7157	CASP8|JUN|MAPK1|RB1|RELA|TP53	-6.24785	0	3	0	0	-13.4657	111.644
1	-7.02701	hsa04151	M1	1	0	KEGG Pathway	24	PI3K-Akt signaling pathway		-7.02701	18.1028	10.7037	30211	0.019774	354	33	7	21.2121	7.11647	1956|2932|4609|5594|5728|5970|7157	EGFR|GSK3B|MYC|MAPK1|PTEN|RELA|TP53	-6.21957	0	3	0	0	-13.4657	111.644
1	-5.93879	hsa05223	M1	1	0	KEGG Pathway	24	Non-small cell lung cancer		-5.93879	50.8603	14.0069	30211	0.0555556	72	33	4	12.1212	5.68144	1956|5594|5925|7157	EGFR|MAPK1|RB1|TP53	-5.23474	0	3	0	0	-13.4657	111.644
1	-5.046	hsa05216	M1	1	0	KEGG Pathway	24	Thyroid cancer		-5.046	74.2285	14.7384	30211	0.0810811	37	33	3	9.09091	5.00438	4609|5594|7157	MYC|MAPK1|TP53	-4.42326	0	3	0	0	-13.4657	111.644
1	-5.03827	hsa04919	M1	1	0	KEGG Pathway	24	Thyroid hormone signaling pathway		-5.03827	30.264	10.666	30211	0.0330579	121	33	4	12.1212	5.68144	2932|4609|5594|7157	GSK3B|MYC|MAPK1|TP53	-4.42079	0	3	0	0	-13.4657	111.644
1	-4.48785	hsa04310	M1	1	0	KEGG Pathway	24	Wnt signaling pathway		-4.48785	21.9278	8.96788	30211	0.0239521	167	33	4	12.1212	5.68144	2932|3725|4609|7157	GSK3B|JUN|MYC|TP53	-3.90554	0	3	0	0	-13.4657	111.644
1	-4.26574	hsa05221	M1	1	0	KEGG Pathway	24	Acute myeloid leukemia		-4.26574	40.9919	10.8367	30211	0.0447761	67	33	3	9.09091	5.00438	4609|5594|5970	MYC|MAPK1|RELA	-3.70231	0	3	0	0	-13.4657	111.644
1	-3.29196	hsa04550	M1	1	0	KEGG Pathway	24	Signaling pathways regulating pluripotency of stem cells		-3.29196	19.206	7.21634	30211	0.020979	143	33	3	9.09091	5.00438	2932|4609|5594	GSK3B|MYC|MAPK1	-2.7968	0	3	0	0	-13.4657	111.644
1	-2.92151	hsa05202	M1	1	0	KEGG Pathway	24	Transcriptional misregulation in cancer		-2.92151	14.3045	6.11556	30211	0.015625	192	33	3	9.09091	5.00438	4609|5970|7157	MYC|RELA|TP53	-2.43417	0	3	0	0	-13.4657	111.644
1	-13.0738	hsa04657	M1	1	0	KEGG Pathway	24	IL-17 signaling pathway		-13.0738	77.9136	24.6972	30211	0.0851064	94	33	8	24.2424	7.46009	841|2932|3725|5594|5743|5970|7124|7128	CASP8|GSK3B|JUN|MAPK1|PTGS2|RELA|TNF|TNFAIP3	-11.4404	0	4	1	1	-13.0738	77.9136
1	-12.1252	hsa05169	M1	1	0	KEGG Pathway	24	Epstein-Barr virus infection		-12.1252	40.7889	18.7629	30211	0.0445545	202	33	9	27.2727	7.75275	841|3725|4609|4734|5925|5970|7124|7128|7157	CASP8|JUN|MYC|NEDD4|RB1|RELA|TNF|TNFAIP3|TP53	-10.6678	0	4	0	0	-13.0738	77.9136
1	-11.8807	hsa05417	M1	1	0	KEGG Pathway	24	Lipid and atherosclerosis		-11.8807	38.3226	18.1613	30211	0.0418605	215	33	9	27.2727	7.75275	841|2932|3309|3725|4780|5594|5970|7124|7157	CASP8|GSK3B|HSPA5|JUN|NFE2L2|MAPK1|RELA|TNF|TP53	-10.458	0	4	0	0	-13.0738	77.9136
1	-10.5031	hsa04668	M1	1	0	KEGG Pathway	24	TNF signaling pathway		-10.5031	57.2178	19.7103	30211	0.0625	112	33	7	21.2121	7.11647	841|3725|5594|5743|5970|7124|7128	CASP8|JUN|MAPK1|PTGS2|RELA|TNF|TNFAIP3	-9.3283	0	4	0	0	-13.0738	77.9136
1	-8.83062	hsa04625	M1	1	0	KEGG Pathway	24	C-type lectin receptor signaling pathway		-8.83062	52.8164	17.504	30211	0.0576923	104	33	6	18.1818	6.71408	841|3725|5594|5743|5970|7124	CASP8|JUN|MAPK1|PTGS2|RELA|TNF	-7.78542	0	4	0	0	-13.0738	77.9136
1	-8.81521	hsa05022	M1	1	0	KEGG Pathway	24	Pathways of neurodegeneration - multiple diseases		-8.81521	17.3096	11.8604	30211	0.0189076	476	33	9	27.2727	7.75275	841|2932|3309|5594|5743|5970|6622|7124|7345	CASP8|GSK3B|HSPA5|MAPK1|PTGS2|RELA|SNCA|TNF|UCHL1	-7.7838	0	4	0	0	-13.0738	77.9136
1	-8.12704	hsa04210	M1	1	0	KEGG Pathway	24	Apoptosis		-8.12704	40.389	15.224	30211	0.0441176	136	33	6	18.1818	6.71408	841|3725|5594|5970|7124|7157	CASP8|JUN|MAPK1|RELA|TNF|TP53	-7.15868	0	4	0	0	-13.0738	77.9136
1	-8.09729	hsa05131	M1	1	0	KEGG Pathway	24	Shigellosis		-8.09729	25.9449	13.0172	30211	0.0283401	247	33	7	21.2121	7.11647	1956|2932|3725|5594|5970|7124|7157	EGFR|GSK3B|JUN|MAPK1|RELA|TNF|TP53	-7.14052	0	4	0	0	-13.0738	77.9136
1	-8.07012	hsa05162	M1	1	0	KEGG Pathway	24	Measles		-8.07012	39.5173	15.0511	30211	0.0431655	139	33	6	18.1818	6.71408	841|2932|3725|5970|7128|7157	CASP8|GSK3B|JUN|RELA|TNFAIP3|TP53	-7.12463	0	4	0	0	-13.0738	77.9136
1	-7.7866	hsa04932	M1	1	0	KEGG Pathway	24	Non-alcoholic fatty liver disease		-7.7866	35.4381	14.2143	30211	0.0387097	155	33	6	18.1818	6.71408	841|2932|3725|5970|7040|7124	CASP8|GSK3B|JUN|RELA|TGFB1|TNF	-6.88351	0	4	0	0	-13.0738	77.9136
1	-7.34258	hsa04621	M1	1	0	KEGG Pathway	24	NOD-like receptor signaling pathway		-7.34258	29.8528	12.9816	30211	0.0326087	184	33	6	18.1818	6.71408	841|3725|5594|5970|7124|7128	CASP8|JUN|MAPK1|RELA|TNF|TNFAIP3	-6.48726	0	4	0	0	-13.0738	77.9136
1	-7.01576	hsa04620	M1	1	0	KEGG Pathway	24	Toll-like receptor signaling pathway		-7.01576	44.0137	14.5304	30211	0.0480769	104	33	5	15.1515	6.24156	841|3725|5594|5970|7124	CASP8|JUN|MAPK1|RELA|TNF	-6.21957	0	4	0	0	-13.0738	77.9136
1	-7.01576	hsa04660	M1	1	0	KEGG Pathway	24	T cell receptor signaling pathway		-7.01576	44.0137	14.5304	30211	0.0480769	104	33	5	15.1515	6.24156	2932|3725|5594|5970|7124	GSK3B|JUN|MAPK1|RELA|TNF	-6.21957	0	4	0	0	-13.0738	77.9136
1	-6.78755	hsa05010	M1	1	0	KEGG Pathway	24	Alzheimer disease		-6.78755	16.6885	10.2313	30211	0.0182292	384	33	7	21.2121	7.11647	841|2932|5594|5743|5970|6622|7124	CASP8|GSK3B|MAPK1|PTGS2|RELA|SNCA|TNF	-6.00687	0	4	0	0	-13.0738	77.9136
1	-6.74712	hsa05171	M1	1	0	KEGG Pathway	24	Coronavirus disease - COVID-19		-6.74712	23.6763	11.4656	30211	0.0258621	232	33	6	18.1818	6.71408	1956|3725|5594|5970|6130|7124	EGFR|JUN|MAPK1|RELA|RPL7A|TNF	-5.97399	0	4	0	0	-13.0738	77.9136
1	-6.72282	hsa04071	M1	1	0	KEGG Pathway	24	Sphingolipid signaling pathway		-6.72282	38.4657	13.5416	30211	0.0420168	119	33	5	15.1515	6.24156	5594|5728|5970|7124|7157	MAPK1|PTEN|RELA|TNF|TP53	-5.96441	0	4	0	0	-13.0738	77.9136
1	-6.72282	hsa04722	M1	1	0	KEGG Pathway	24	Neurotrophin signaling pathway		-6.72282	38.4657	13.5416	30211	0.0420168	119	33	5	15.1515	6.24156	2932|3725|5594|5970|7157	GSK3B|JUN|MAPK1|RELA|TP53	-5.96441	0	4	0	0	-13.0738	77.9136
1	-6.56658	hsa05132	M1	1	0	KEGG Pathway	24	Salmonella infection		-6.56658	22.0599	11.0346	30211	0.0240964	249	33	6	18.1818	6.71408	841|3725|4609|5594|5970|7124	CASP8|JUN|MYC|MAPK1|RELA|TNF	-5.81535	0	4	0	0	-13.0738	77.9136
1	-6.41809	hsa05135	M1	1	0	KEGG Pathway	24	Yersinia infection		-6.41809	33.4119	12.5735	30211	0.0364963	137	33	5	15.1515	6.24156	2932|3725|5594|5970|7124	GSK3B|JUN|MAPK1|RELA|TNF	-5.68771	0	4	0	0	-13.0738	77.9136
1	-6.34079	hsa04936	M1	1	0	KEGG Pathway	24	Alcoholic liver disease		-6.34079	32.2354	12.3373	30211	0.0352113	142	33	5	15.1515	6.24156	841|2194|2932|5970|7124	CASP8|FASN|GSK3B|RELA|TNF	-5.61714	0	4	0	0	-13.0738	77.9136
1	-6.15232	hsa04150	M1	1	0	KEGG Pathway	24	mTOR signaling pathway		-6.15232	29.5318	11.7765	30211	0.0322581	155	33	5	15.1515	6.24156	2932|5594|5728|6520|7124	GSK3B|MAPK1|PTEN|SLC3A2|TNF	-5.4353	0	4	0	0	-13.0738	77.9136
1	-5.84423	hsa05133	M1	1	0	KEGG Pathway	24	Pertussis		-5.84423	48.1834	13.6191	30211	0.0526316	76	33	4	12.1212	5.68144	3725|5594|5970|7124	JUN|MAPK1|RELA|TNF	-5.15277	0	4	0	0	-13.0738	77.9136
1	-5.71165	hsa04662	M1	1	0	KEGG Pathway	24	B cell receptor signaling pathway		-5.71165	44.6578	13.0907	30211	0.0487805	82	33	4	12.1212	5.68144	2932|3725|5594|5970	GSK3B|JUN|MAPK1|RELA	-5.03242	0	4	0	0	-13.0738	77.9136
1	-5.63968	hsa05130	M1	1	0	KEGG Pathway	24	Pathogenic Escherichia coli infection		-5.63968	23.2357	10.354	30211	0.0253807	197	33	5	15.1515	6.24156	841|3725|5594|5970|7124	CASP8|JUN|MAPK1|RELA|TNF	-4.96644	0	4	0	0	-13.0738	77.9136
1	-5.57588	hsa05415	M1	1	0	KEGG Pathway	24	Diabetic cardiomyopathy		-5.57588	22.5489	10.1869	30211	0.0246305	203	33	5	15.1515	6.24156	2932|5728|5970|7040|7042	GSK3B|PTEN|RELA|TGFB1|TGFB2	-4.91438	0	4	0	0	-13.0738	77.9136
1	-5.48378	hsa05170	M1	1	0	KEGG Pathway	24	Human immunodeficiency virus 1 infection		-5.48378	21.5916	9.94929	30211	0.0235849	212	33	5	15.1515	6.24156	841|3725|5594|5970|7124	CASP8|JUN|MAPK1|RELA|TNF	-4.83372	0	4	0	0	-13.0738	77.9136
1	-5.29921	hsa04064	M1	1	0	KEGG Pathway	24	NF-kappa B signaling pathway		-5.29921	35.211	11.5567	30211	0.0384615	104	33	4	12.1212	5.68144	5743|5970|7124|7128	PTGS2|RELA|TNF|TNFAIP3	-4.65474	0	4	0	0	-13.0738	77.9136
1	-5.23403	hsa04931	M1	1	0	KEGG Pathway	24	Insulin resistance		-5.23403	33.9068	11.3287	30211	0.037037	108	33	4	12.1212	5.68144	2932|5728|5970|7124	GSK3B|PTEN|RELA|TNF	-4.60056	0	4	0	0	-13.0738	77.9136
1	-4.47662	hsa05134	M1	1	0	KEGG Pathway	24	Legionellosis		-4.47662	48.1834	11.7907	30211	0.0526316	57	33	3	9.09091	5.00438	841|5970|7124	CASP8|RELA|TNF	-3.8991	0	4	0	0	-13.0738	77.9136
1	-4.4477	hsa05164	M1	1	0	KEGG Pathway	24	Influenza A		-4.4477	21.4149	8.85282	30211	0.0233918	171	33	4	12.1212	5.68144	841|5594|5970|7124	CASP8|MAPK1|RELA|TNF	-3.87493	0	4	0	0	-13.0738	77.9136
1	-4.22749	hsa04920	M1	1	0	KEGG Pathway	24	Adipocytokine signaling pathway		-4.22749	39.8037	10.6708	30211	0.0434783	69	33	3	9.09091	5.00438	2182|5970|7124	ACSL4|RELA|TNF	-3.66865	0	4	0	0	-13.0738	77.9136
1	-4.20879	hsa04622	M1	1	0	KEGG Pathway	24	RIG-I-like receptor signaling pathway		-4.20879	39.2351	10.5906	30211	0.0428571	70	33	3	9.09091	5.00438	841|5970|7124	CASP8|RELA|TNF	-3.66345	0	4	0	0	-13.0738	77.9136
1	-4.20879	hsa04917	M1	1	0	KEGG Pathway	24	Prolactin signaling pathway		-4.20879	39.2351	10.5906	30211	0.0428571	70	33	3	9.09091	5.00438	2932|5594|5970	GSK3B|MAPK1|RELA	-3.66345	0	4	0	0	-13.0738	77.9136
1	-4.1722	hsa04137	M1	1	0	KEGG Pathway	24	Mitophagy - animal		-4.1722	38.1452	10.435	30211	0.0416667	72	33	3	9.09091	5.00438	3725|5970|7157	JUN|RELA|TP53	-3.63128	0	4	0	0	-13.0738	77.9136
1	-3.66327	hsa05020	M1	1	0	KEGG Pathway	24	Prion disease		-3.66327	13.4137	6.81331	30211	0.014652	273	33	4	12.1212	5.68144	2932|3309|5594|7124	GSK3B|HSPA5|MAPK1|TNF	-3.15202	0	4	0	0	-13.0738	77.9136
1	-3.34628	hsa04910	M1	1	0	KEGG Pathway	24	Insulin signaling pathway		-3.34628	20.0471	7.38892	30211	0.0218978	137	33	3	9.09091	5.00438	2194|2932|5594	FASN|GSK3B|MAPK1	-2.84314	0	4	0	0	-13.0738	77.9136
1	-2.92151	hsa04062	M1	1	0	KEGG Pathway	24	Chemokine signaling pathway		-2.92151	14.3045	6.11556	30211	0.015625	192	33	3	9.09091	5.00438	2932|5594|5970	GSK3B|MAPK1|RELA	-2.43417	0	4	0	0	-13.0738	77.9136
1	-2.6991	hsa05168	M1	1	0	KEGG Pathway	24	Herpes simplex virus 1 infection		-2.6991	7.39786	4.74601	30211	0.00808081	495	33	4	12.1212	5.68144	841|5970|7124|7157	CASP8|RELA|TNF|TP53	-2.21944	0	4	0	0	-13.0738	77.9136
1	-11.6853	hsa05418	M1	1	0	KEGG Pathway	24	Fluid shear stress and atherosclerosis		-11.6853	52.6898	20.1984	30211	0.057554	139	33	8	24.2424	7.46009	1728|2950|3162|3725|4780|5970|7124|7157	NQO1|GSTP1|HMOX1|JUN|NFE2L2|RELA|TNF|TP53	-10.3883	0	5	1	1	-11.6853	52.6898
1	-10.036	hsa05208	M1	1	0	KEGG Pathway	24	Chemical carcinogenesis - reactive oxygen species		-10.036	32.8425	15.7824	30211	0.0358744	223	33	8	24.2424	7.46009	1728|1956|3162|3725|4780|5594|5728|5970	NQO1|EGFR|HMOX1|JUN|NFE2L2|MAPK1|PTEN|RELA	-8.89737	0	6	1	1	-10.036	53.852
1	-7.4571	hsa04012	M1	1	0	KEGG Pathway	24	ErbB signaling pathway		-7.4571	53.852	16.1357	30211	0.0588235	85	33	5	15.1515	6.24156	1956|2932|3725|4609|5594	EGFR|GSK3B|JUN|MYC|MAPK1	-6.57375	0	6	0	0	-10.036	53.852
1	-7.35621	hsa05235	M1	1	0	KEGG Pathway	24	PD-L1 expression and PD-1 checkpoint pathway in cancer		-7.35621	51.4317	15.7559	30211	0.0561798	89	33	5	15.1515	6.24156	1956|3725|5594|5728|5970	EGFR|JUN|MAPK1|PTEN|RELA	-6.49175	0	6	0	0	-10.036	53.852
1	-6.97805	hsa05207	M1	1	0	KEGG Pathway	24	Chemical carcinogenesis - receptor activation		-6.97805	25.9099	12.0358	30211	0.0283019	212	33	6	18.1818	6.71408	1956|3725|4609|5594|5925|5970	EGFR|JUN|MYC|MAPK1|RB1|RELA	-6.18968	0	6	0	0	-10.036	53.852
1	-6.54807	hsa04926	M1	1	0	KEGG Pathway	24	Relaxin signaling pathway		-6.54807	35.4839	12.9791	30211	0.0387597	129	33	5	15.1515	6.24156	1956|3725|5594|5970|7040	EGFR|JUN|MAPK1|RELA|TGFB1	-5.8039	0	6	0	0	-10.036	53.852
1	-5.77663	hsa01521	M1	1	0	KEGG Pathway	24	EGFR tyrosine kinase inhibitor resistance		-5.77663	46.3537	13.3475	30211	0.0506329	79	33	4	12.1212	5.68144	1956|2932|5594|5728	EGFR|GSK3B|MAPK1|PTEN	-5.09133	0	6	0	0	-10.036	53.852
1	-5.59693	hsa04510	M1	1	0	KEGG Pathway	24	Focal adhesion		-5.59693	22.7733	10.2418	30211	0.0248756	201	33	5	15.1515	6.24156	1956|2932|3725|5594|5728	EGFR|GSK3B|JUN|MAPK1|PTEN	-4.9296	0	6	0	0	-10.036	53.852
1	-5.23403	hsa04659	M1	1	0	KEGG Pathway	24	Th17 cell differentiation		-5.23403	33.9068	11.3287	30211	0.037037	108	33	4	12.1212	5.68144	3725|5594|5970|7040	JUN|MAPK1|RELA|TGFB1	-4.60056	0	6	0	0	-10.036	53.852
1	-5.21813	hsa04066	M1	1	0	KEGG Pathway	24	HIF-1 signaling pathway		-5.21813	33.5958	11.2736	30211	0.0366972	109	33	4	12.1212	5.68144	1956|3162|5594|5970	EGFR|HMOX1|MAPK1|RELA	-4.59005	0	6	0	0	-10.036	53.852
1	-4.62564	hsa04921	M1	1	0	KEGG Pathway	24	Oxytocin signaling pathway		-4.62564	23.7788	9.37143	30211	0.025974	154	33	4	12.1212	5.68144	1956|3725|5594|5743	EGFR|JUN|MAPK1|PTGS2	-4.02358	0	6	0	0	-10.036	53.852
1	-4.61462	hsa04934	M1	1	0	KEGG Pathway	24	Cushing syndrome		-4.61462	23.6254	9.33865	30211	0.0258065	155	33	4	12.1212	5.68144	1956|2932|5594|5925	EGFR|GSK3B|MAPK1|RB1	-4.01758	0	6	0	0	-10.036	53.852
1	-4.20879	hsa05120	M1	1	0	KEGG Pathway	24	Epithelial cell signaling in Helicobacter pylori infection		-4.20879	39.2351	10.5906	30211	0.0428571	70	33	3	9.09091	5.00438	1956|3725|5970	EGFR|JUN|RELA	-3.66345	0	6	0	0	-10.036	53.852
1	-3.85528	hsa04658	M1	1	0	KEGG Pathway	24	Th1 and Th2 cell differentiation		-3.85528	29.8528	9.16533	30211	0.0326087	92	33	3	9.09091	5.00438	3725|5594|5970	JUN|MAPK1|RELA	-3.32732	0	6	0	0	-10.036	53.852
1	-3.84136	hsa04912	M1	1	0	KEGG Pathway	24	GnRH signaling pathway		-3.84136	29.5318	9.11264	30211	0.0322581	93	33	3	9.09091	5.00438	1956|3725|5594	EGFR|JUN|MAPK1	-3.31764	0	6	0	0	-10.036	53.852
1	-3.77402	hsa05231	M1	1	0	KEGG Pathway	24	Choline metabolism in cancer		-3.77402	28.025	8.86114	30211	0.0306122	98	33	3	9.09091	5.00438	1956|3725|5594	EGFR|JUN|MAPK1	-3.25865	0	6	0	0	-10.036	53.852
1	-3.33706	hsa04915	M1	1	0	KEGG Pathway	24	Estrogen signaling pathway		-3.33706	19.9018	7.3594	30211	0.0217391	138	33	3	9.09091	5.00438	1956|3725|5594	EGFR|JUN|MAPK1	-2.83792	0	6	0	0	-10.036	53.852
1	-2.74668	hsa04024	M1	1	0	KEGG Pathway	24	cAMP signaling pathway		-2.74668	12.4274	5.63822	30211	0.0135747	221	33	3	9.09091	5.00438	3725|5594|5970	JUN|MAPK1|RELA	-2.2632	0	6	0	0	-10.036	53.852
1	-2.68665	hsa04014	M1	1	0	KEGG Pathway	24	Ras signaling pathway		-2.68665	11.8382	5.47997	30211	0.012931	232	33	3	9.09091	5.00438	1956|5594|5970	EGFR|MAPK1|RELA	-2.21079	0	6	0	0	-10.036	53.852
1	-9.08351	hsa04216	M1	1	0	KEGG Pathway	24	Ferroptosis		-9.08351	111.644	23.4434	30211	0.121951	41	33	5	15.1515	6.24156	246|2182|3162|6520|7157	ALOX15|ACSL4|HMOX1|SLC3A2|TP53	-7.99411	0	7	1	1	-9.08351	111.644
1	-5.91465	hsa01524	M1	1	0	KEGG Pathway	24	Platinum drug resistance		-5.91465	50.1636	13.907	30211	0.0547945	73	33	4	12.1212	5.68144	841|2950|5594|7157	CASP8|GSTP1|MAPK1|TP53	-5.21694	0	8	1	1	-5.91465	50.1636
1	-4.1543	hsa04115	M1	1	0	KEGG Pathway	24	p53 signaling pathway		-4.1543	37.6227	10.3596	30211	0.0410959	73	33	3	9.09091	5.00438	841|5728|7157	CASP8|PTEN|TP53	-3.61774	0	8	0	0	-5.91465	50.1636
1	-5.00499	hsa05012	M1	1	0	KEGG Pathway	24	Parkinson disease		-5.00499	17.2084	8.78021	30211	0.018797	266	33	5	15.1515	6.24156	3309|4780|6622|7157|7345	HSPA5|NFE2L2|SNCA|TP53|UCHL1	-4.39271	0	9	1	1	-5.00499	17.2084
1	-2.14016	hsa05014	M1	1	0	KEGG Pathway	24	Amyotrophic lateral sclerosis		-2.14016	7.5452	4.15442	30211	0.00824176	364	33	3	9.09091	5.00438	3309|7124|7157	HSPA5|TNF|TP53	-1.67179	0	9	0	0	-5.00499	17.2084
1	-4.57126	hsa04217	M1	1	0	KEGG Pathway	24	Necroptosis		-4.57126	23.0311	9.21053	30211	0.0251572	159	33	4	12.1212	5.68144	246|841|7124|7128	ALOX15|CASP8|TNF|TNFAIP3	-3.98409	0	10	1	1	-4.57126	23.0311
1	-4.43153	hsa04370	M1	1	0	KEGG Pathway	24	VEGF signaling pathway		-4.43153	46.5501	11.5809	30211	0.0508475	59	33	3	9.09091	5.00438	3315|5594|5743	HSPB1|MAPK1|PTGS2	-3.86346	0	11	1	1	-4.43153	46.5501
1	-3.56909	hsa04726	M1	1	0	KEGG Pathway	24	Serotonergic synapse		-3.56909	23.8822	8.1298	30211	0.026087	115	33	3	9.09091	5.00438	246|5594|5743	ALOX15|MAPK1|PTGS2	-3.06192	0	11	0	0	-4.43153	46.5501

[truncated: 2 more sheets: BP, CC and MF enrichment score, Bubble diagram OF KEGG]
